# Supplementary material for: In silico Prediction of Protein–Protein Interaction Network Induced by Manganese II in Meyerozyma guilliermondii
Source: Front Microbiol. 2020 Feb 19;11:236. doi: 10.3389/fmicb.2020.00236 (PMC7042463; doi:10.3389/fmicb.2020.00236)
Supplement: Supplementary file 1 [file Table_1.xlsx]

## Sheet: Plan1
Table S1.Description of the enrichment of proteins identified in the proteome of M.guilliermondii.
#node1	node2	node1_string_internal_id	node2	neighborhood_on_chromosome	gene_fusion	phylogenetic_cooccurrence	homology	coexpression	experimentally_determined_interaction	database_annotated	automated_textmining	combined_score
PGUG_02539	PGUG_05417	1855572	1853159	4929.XP_001484810.1	4929.XP_001482397.1	0.098	0	0	0	0.977	0.893	0	0.628	0.999
PGUG_04681	PGUG_05380	1853488	1853122	4929.XP_001482726.1	4929.XP_001482360.1	0	0	0	0	0.951	0.085	0.900	0.892	0.999
PGUG_02119	PGUG_01327	1857210	1856418	4929.XP_001486448.1	4929.XP_001485656.1	0	0	0	0	0.744	0.982	0	0.887	0.999
PGUG_04067	PGUG_05417	1854100	1853159	4929.XP_001483338.1	4929.XP_001482397.1	0.176	0	0	0	0.986	0.893	0	0.748	0.999
PGUG_04067	PGUG_03990	1854100	1854023	4929.XP_001483338.1	4929.XP_001483261.1	0.176	0	0	0	0.929	0.991	0	0.783	0.999
RPS1	PGUG_05417	1853516	1853159	4929.XP_001482754.1	4929.XP_001482397.1	0	0	0	0	0.956	0.984	0	0.564	0.999
PGUG_01007	PGUG_04067	1858392	1854100	4929.XP_001487630.1	4929.XP_001483338.1	0	0	0	0	0.969	0.893	0	0.778	0.999
PGUG_03356	MET3	1854737	1853890	4929.XP_001483975.1	4929.XP_001483128.1	0.219	0.601	0	0	0.986	0	0.900	0.892	0.999
PGUG_01007	PGUG_02028	1858392	1857119	4929.XP_001487630.1	4929.XP_001486357.1	0	0	0	0	0.929	0.982	0	0.635	0.999
PGUG_01133	PGUG_00316	1858518	1857701	4929.XP_001487756.1	4929.XP_001486939.1	0.219	0	0.469	0	0.923	0.999	0	0.868	0.999
PGUG_00316	PGUG_01384	1857701	1856475	4929.XP_001486939.1	4929.XP_001485713.1	0.162	0	0.472	0	0.823	0.999	0	0.892	0.999
PGUG_03763	PGUG_04335	1855144	1854368	4929.XP_001484382.1	4929.XP_001483606.1	0	0.899	0.479	0	0.832	0.880	0.900	0.892	0.999
PGUG_02119	PGUG_04960	1857210	1853767	4929.XP_001486448.1	4929.XP_001483005.1	0	0	0	0	0.537	0.983	0	0.891	0.999
PGUG_00031	UTP10	1857416	1855581	4929.XP_001486654.1	4929.XP_001484819.1	0	0	0	0	0.936	0.997	0	0.889	0.999
PGUG_04476	PGUG_04067	1854509	1854100	4929.XP_001483747.1	4929.XP_001483338.1	0	0	0	0	0.987	0.893	0	0.458	0.999
PGUG_01877	PGUG_02624	1856967	1855657	4929.XP_001486205.1	4929.XP_001484895.1	0.219	0	0	0	0.955	0.893	0	0.769	0.999
PGUG_01875	PGUG_03123	1856966	1856156	4929.XP_001486204.1	4929.XP_001485394.1	0.219	0.009	0	0	0.914	0.678	0.900	0.780	0.999
PGUG_01891	PGUG_02798	1856982	1855831	4929.XP_001486220.1	4929.XP_001485069.1	0	0	0	0	0.975	0.893	0	0.709	0.999
PGUG_01405	PGUG_03808	1856496	1855189	4929.XP_001485734.1	4929.XP_001484427.1	0.219	0.899	0	0	0.882	0.389	0	0.892	0.999
PGUG_02173	PGUG_02105	1857264	1857196	4929.XP_001486502.1	4929.XP_001486434.1	0	0.807	0.477	0	0.992	0.991	0.900	0.892	0.999
PGUG_01007	RPS1	1858392	1853516	4929.XP_001487630.1	4929.XP_001482754.1	0	0	0	0	0.929	0.982	0	0.745	0.999
PGUG_02539	PGUG_04067	1855572	1854100	4929.XP_001484810.1	4929.XP_001483338.1	0.176	0	0	0	0.984	0.893	0	0.777	0.999
PGUG_03985	PGUG_03984	1854018	1854017	4929.XP_001483256.1	4929.XP_001483255.1	0.176	0.704	0.478	0	0.550	0.680	0.800	0.882	0.999
PGUG_05491	PGUG_05417	1853233	1853159	4929.XP_001482471.1	4929.XP_001482397.1	0.098	0	0	0	0.929	0.984	0	0.606	0.999
PGUG_05866	PGUG_05863	1852865	1852862	4929.XP_001482103.1	4929.XP_001482100.1	0.219	0	0	0	0.972	0.209	0.900	0.892	0.999
PGUG_01763	PGUG_04828	1856854	1853635	4929.XP_001486092.1	4929.XP_001482873.1	0.448	0.311	0.361	0	0.999	0	0.900	0.892	0.999
PGUG_00055	PGUG_02052	1857440	1857143	4929.XP_001486678.1	4929.XP_001486381.1	0.219	0	0	0	0.908	0	0.900	0.885	0.999
PGUG_00866	PGUG_05474	1858251	1853216	4929.XP_001487489.1	4929.XP_001482454.1	0	0	0	0	0.838	0.997	0	0.787	0.999
PGUG_00924	PGUG_03239	1858309	1856272	4929.XP_001487547.1	4929.XP_001485510.1	0	0	0	0	0.737	0.997	0.800	0.892	0.999
PGUG_01384	PGUG_02610	1856475	1855643	4929.XP_001485713.1	4929.XP_001484881.1	0.162	0	0	0	0.929	0.999	0	0.775	0.999
PGUG_01951	PGUG_02539	1857042	1855572	4929.XP_001486280.1	4929.XP_001484810.1	0.098	0	0	0	0.970	0.893	0	0.709	0.999
PGUG_01327	PGUG_04960	1856418	1853767	4929.XP_001485656.1	4929.XP_001483005.1	0	0	0	0	0.737	0.973	0	0.885	0.999
PGUG_01877	PGUG_02539	1856967	1855572	4929.XP_001486205.1	4929.XP_001484810.1	0.176	0	0	0	0.975	0.893	0	0.778	0.999
PGUG_00501	PGUG_05422	1857886	1853164	4929.XP_001487124.1	4929.XP_001482402.1	0	0	0	0	0.729	0.954	0.800	0.885	0.999
PGUG_01182	PGUG_01438	1858567	1856529	4929.XP_001487805.1	4929.XP_001485767.1	0.176	0	0	0	0.808	0.893	0.800	0.891	0.999
PGUG_00316	PGUG_02610	1857701	1855643	4929.XP_001486939.1	4929.XP_001484881.1	0.219	0	0.261	0	0.929	0.999	0	0.776	0.999
PGUG_01505	PGUG_01364	1856596	1856455	4929.XP_001485834.1	4929.XP_001485693.1	0.336	0.875	0.394	0	0.999	0.049	0	0.892	0.999
PGUG_00485	PGUG_05410	1857870	1853152	4929.XP_001487108.1	4929.XP_001482390.1	0	0	0	0	0.725	0.893	0.800	0.887	0.999
PGUG_02028	RPS1	1857119	1853516	4929.XP_001486357.1	4929.XP_001482754.1	0	0	0	0	0.929	0.982	0	0.330	0.999
PGUG_02787	PGUG_04080	1855820	1854113	4929.XP_001485058.1	4929.XP_001483351.1	0.219	0.768	0.479	0	0.832	0.811	0.800	0.785	0.999
PGUG_02959	PGUG_03392	1855992	1854773	4929.XP_001485230.1	4929.XP_001484011.1	0	0	0	0	0.087	0.999	0	0.884	0.999
PGUG_01951	PGUG_01877	1857042	1856967	4929.XP_001486280.1	4929.XP_001486205.1	0.176	0	0	0	0.972	0.976	0	0.856	0.999
PGUG_02909	PGUG_02641	1855942	1855674	4929.XP_001485180.1	4929.XP_001484912.1	0.176	0.732	0.469	0	0.256	0.559	0.900	0.879	0.999
PGUG_01875	PGUG_02911	1856966	1855944	4929.XP_001486204.1	4929.XP_001485182.1	0.219	0	0	0	0.732	0.676	0.900	0.887	0.999
PGUG_00514	PGUG_01505	1857899	1856596	4929.XP_001487137.1	4929.XP_001485834.1	0.336	0	0.430	0	0.967	0.065	0.900	0.892	0.999
PGUG_01171	PGUG_01877	1858556	1856967	4929.XP_001487794.1	4929.XP_001486205.1	0.095	0	0.251	0	0.971	0.893	0	0.605	0.999
PGUG_01007	PGUG_05491	1858392	1853233	4929.XP_001487630.1	4929.XP_001482471.1	0	0	0	0	0.929	0.982	0	0.781	0.999
PGUG_01951	PGUG_04067	1857042	1854100	4929.XP_001486280.1	4929.XP_001483338.1	0.176	0	0	0	0.978	0.893	0	0.779	0.999
PGUG_01133	PGUG_02610	1858518	1855643	4929.XP_001487756.1	4929.XP_001484881.1	0.219	0	0	0	0.929	0.999	0	0.751	0.999
PGUG_00055	PGUG_05628	1857440	1853370	4929.XP_001486678.1	4929.XP_001482608.1	0.219	0	0.472	0	0.899	0	0.900	0.892	0.999
PGUG_02126	PGUG_05290	1857217	1853032	4929.XP_001486455.1	4929.XP_001482270.1	0	0	0	0	0.738	0.999	0	0.892	0.999
PGUG_01007	PGUG_02539	1858392	1855572	4929.XP_001487630.1	4929.XP_001484810.1	0	0	0	0	0.967	0.893	0	0.771	0.999
PGUG_01763	PGUG_01677	1856854	1856768	4929.XP_001486092.1	4929.XP_001486006.1	0.327	0.842	0.432	0	0.744	0.737	0.800	0.892	0.999
PGUG_00452	PGUG_02074	1857837	1857165	4929.XP_001487075.1	4929.XP_001486403.1	0	0	0	0	0.623	0.893	0.800	0.892	0.999
PGUG_01877	PGUG_04067	1856967	1854100	4929.XP_001486205.1	4929.XP_001483338.1	0.219	0	0	0	0.980	0.893	0	0.782	0.999
PGUG_00150	PGUG_03763	1857535	1855144	4929.XP_001486773.1	4929.XP_001484382.1	0.162	0.080	0.469	0	0.846	0.814	0.900	0.888	0.999
PGUG_01133	PGUG_01384	1858518	1856475	4929.XP_001487756.1	4929.XP_001485713.1	0.162	0	0.475	0.624	0.959	0.999	0	0.892	0.999
PGUG_00379	PGUG_04067	1857765	1854100	4929.XP_001487003.1	4929.XP_001483338.1	0.162	0	0	0	0.980	0.893	0	0.606	0.999
PGUG_01007	PGUG_05417	1858392	1853159	4929.XP_001487630.1	4929.XP_001482397.1	0	0	0	0	0.973	0.984	0	0.606	0.999
PGUG_01600	UTP10	1856691	1855581	4929.XP_001485929.1	4929.XP_001484819.1	0	0	0	0	0.797	0.997	0	0.395	0.999
PGUG_00657	PGUG_04067	1858042	1854100	4929.XP_001487280.1	4929.XP_001483338.1	0.176	0	0	0	0.966	0.893	0	0.731	0.999
PGUG_03626	PGUG_04828	1855007	1853635	4929.XP_001484245.1	4929.XP_001482873.1	0.429	0	0.235	0	0.983	0	0	0.892	0.999
PGUG_01877	PGUG_05417	1856967	1853159	4929.XP_001486205.1	4929.XP_001482397.1	0.176	0	0	0	0.980	0.893	0	0.731	0.999
PGUG_00485	PGUG_04673	1857870	1853480	4929.XP_001487108.1	4929.XP_001482718.1	0	0	0	0	0.737	0.954	0.800	0.892	0.999
PGUG_01951	PGUG_02798	1857042	1855831	4929.XP_001486280.1	4929.XP_001485069.1	0.170	0	0	0	0.956	0.906	0	0.746	0.999
PGUG_00150	PGUG_04335	1857535	1854368	4929.XP_001486773.1	4929.XP_001483606.1	0	0	0.469	0	0.737	0.714	0.900	0.873	0.999
PGUG_02309	PGUG_03356	1855342	1854737	4929.XP_001484580.1	4929.XP_001483975.1	0.162	0.708	0	0	0.727	0.268	0.900	0.888	0.999
PGUG_05863	PGUG_05862	1852862	1852861	4929.XP_001482100.1	4929.XP_001482099.1	0.219	0	0.260	0	0.737	0.274	0.900	0.892	0.998
TRM8	TRM82	1858213	1853685	4929.XP_001487451.1	4929.XP_001482923.1	0	0	0	0	0.637	0.954	0.360	0.892	0.998
PGUG_04476	PGUG_05417	1854509	1853159	4929.XP_001483747.1	4929.XP_001482397.1	0	0	0	0	0.978	0.893	0	0.308	0.998
RPS0	PGUG_05417	1855403	1853159	4929.XP_001484641.1	4929.XP_001482397.1	0.095	0	0	0	0.963	0.893	0	0.607	0.998
PGUG_00657	PGUG_02539	1858042	1855572	4929.XP_001487280.1	4929.XP_001484810.1	0.098	0	0	0	0.929	0.893	0	0.779	0.998
PGUG_01877	PGUG_04408	1856967	1854441	4929.XP_001486205.1	4929.XP_001483679.1	0	0	0	0	0.929	0.893	0	0.775	0.998
PGUG_02545	PGUG_04067	1855578	1854100	4929.XP_001484816.1	4929.XP_001483338.1	0.176	0	0	0	0.929	0.893	0	0.747	0.998
PGUG_01007	PGUG_00657	1858392	1858042	4929.XP_001487630.1	4929.XP_001487280.1	0	0	0	0	0.966	0.893	0	0.602	0.998
PGUG_01171	PGUG_05417	1858556	1853159	4929.XP_001487794.1	4929.XP_001482397.1	0.076	0	0.273	0	0.960	0.893	0	0.507	0.998
PGUG_01007	PGUG_01877	1858392	1856967	4929.XP_001487630.1	4929.XP_001486205.1	0	0	0	0	0.954	0.893	0	0.731	0.998
PGUG_00756	PGUG_02732	1858141	1855765	4929.XP_001487379.1	4929.XP_001485003.1	0	0	0	0	0.839	0.954	0	0.776	0.998
PGUG_01951	PGUG_01891	1857042	1856982	4929.XP_001486280.1	4929.XP_001486220.1	0.098	0	0	0	0.929	0.974	0	0.329	0.998
PGUG_00379	PGUG_02624	1857765	1855657	4929.XP_001487003.1	4929.XP_001484895.1	0.162	0	0	0	0.929	0.893	0	0.744	0.998
PGUG_01877	PGUG_03816	1856967	1855197	4929.XP_001486205.1	4929.XP_001484435.1	0	0	0	0	0.952	0.893	0	0.750	0.998
PGUG_00719	PGUG_04375	1858104	1854408	4929.XP_001487342.1	4929.XP_001483646.1	0	0	0	0	0.929	0.893	0	0.772	0.998
PGUG_02539	PGUG_05785	1855572	1852785	4929.XP_001484810.1	4929.XP_001482023.1	0.098	0	0	0	0.929	0.893	0	0.769	0.998
PGUG_03816	PGUG_04375	1855197	1854408	4929.XP_001484435.1	4929.XP_001483646.1	0	0	0.464	0	0.929	0.893	0	0.777	0.998
PGUG_00363	PGUG_01877	1857748	1856967	4929.XP_001486986.1	4929.XP_001486205.1	0	0	0	0	0.953	0.893	0	0.724	0.998
PGUG_04520	PGUG_05746	1854553	1852745	4929.XP_001483791.1	4929.XP_001481983.1	0	0	0.337	0.785	0.925	0.978	0	0.770	0.998
PGUG_02798	PGUG_05417	1855831	1853159	4929.XP_001485069.1	4929.XP_001482397.1	0.176	0	0	0	0.957	0.893	0	0.558	0.998
PGUG_02539	PGUG_04375	1855572	1854408	4929.XP_001484810.1	4929.XP_001483646.1	0.176	0	0.361	0	0.929	0.893	0	0.779	0.998
PGUG_03123	PGUG_02911	1856156	1855944	4929.XP_001485394.1	4929.XP_001485182.1	0.219	0.781	0.263	0	0.679	0	0.900	0.731	0.998
PGUG_04408	PGUG_04067	1854441	1854100	4929.XP_001483679.1	4929.XP_001483338.1	0	0	0	0	0.929	0.893	0	0.767	0.998
PGUG_00383	PGUG_01877	1857768	1856967	4929.XP_001487006.1	4929.XP_001486205.1	0.176	0	0	0	0.929	0.893	0	0.779	0.998
PGUG_01877	RPS0	1856967	1855403	4929.XP_001486205.1	4929.XP_001484641.1	0.167	0	0	0	0.929	0.893	0	0.746	0.998
PGUG_00365	PGUG_04403	1857750	1854436	4929.XP_001486988.1	4929.XP_001483674.1	0	0	0	0	0.160	0.905	0.800	0.892	0.998
PGUG_02798	RPS1	1855831	1853516	4929.XP_001485069.1	4929.XP_001482754.1	0	0	0.200	0	0.929	0.893	0	0.778	0.998
PGUG_00240	PGUG_03416	1857625	1854797	4929.XP_001486863.1	4929.XP_001484035.1	0.219	0.755	0	0	0.737	0	0.900	0.819	0.998
PGUG_00779	PGUG_03239	1858164	1856272	4929.XP_001487402.1	4929.XP_001485510.1	0	0	0	0	0.929	0.893	0	0.826	0.998
PGUG_02089	PGUG_04067	1857180	1854100	4929.XP_001486418.1	4929.XP_001483338.1	0	0	0	0	0.929	0.893	0	0.779	0.998
PGUG_03700	PGUG_04207	1855081	1854240	4929.XP_001484319.1	4929.XP_001483478.1	0	0	0	0	0.929	0.893	0	0.775	0.998
PGUG_00926	PGUG_01405	1858311	1856496	4929.XP_001487549.1	4929.XP_001485734.1	0.169	0	0	0	0.929	0.132	0.800	0.892	0.998
PGUG_01180	PGUG_03763	1858565	1855144	4929.XP_001487803.1	4929.XP_001484382.1	0.176	0	0	0	0.743	0.700	0.900	0.812	0.998
PGUG_04538	PGUG_04960	1854571	1853767	4929.XP_001483809.1	4929.XP_001483005.1	0	0	0	0	0.737	0.954	0	0.889	0.998
PGUG_01171	PGUG_00379	1858556	1857765	4929.XP_001487794.1	4929.XP_001487003.1	0.064	0	0.207	0	0.953	0.880	0	0.632	0.998
PGUG_01084	PGUG_00816	1858469	1858201	4929.XP_001487707.1	4929.XP_001487439.1	0	0	0	0	0.723	0.954	0	0.874	0.998
PGUG_02028	PGUG_03990	1857119	1854023	4929.XP_001486357.1	4929.XP_001483261.1	0	0	0	0	0.929	0.893	0	0.808	0.998
PGUG_02545	RPS1	1855578	1853516	4929.XP_001484816.1	4929.XP_001482754.1	0	0	0.276	0	0.929	0.893	0	0.709	0.998
PGUG_03700	PGUG_04408	1855081	1854441	4929.XP_001484319.1	4929.XP_001483679.1	0	0	0	0	0.929	0.893	0	0.769	0.998
PGUG_04375	PGUG_05491	1854408	1853233	4929.XP_001483646.1	4929.XP_001482471.1	0	0	0	0	0.929	0.893	0	0.780	0.998
PGUG_02624	PGUG_04067	1855657	1854100	4929.XP_001484895.1	4929.XP_001483338.1	0.219	0	0	0	0.956	0.893	0	0.626	0.998
PGUG_01007	PGUG_03816	1858392	1855197	4929.XP_001487630.1	4929.XP_001484435.1	0	0	0	0	0.929	0.893	0	0.779	0.998
PGUG_00031	PGUG_05474	1857416	1853216	4929.XP_001486654.1	4929.XP_001482454.1	0	0	0	0	0.738	0.990	0	0.628	0.998
PGUG_02539	PGUG_05491	1855572	1853233	4929.XP_001484810.1	4929.XP_001482471.1	0.098	0	0	0	0.922	0.893	0	0.779	0.998
PGUG_00719	PGUG_00657	1858104	1858042	4929.XP_001487342.1	4929.XP_001487280.1	0.176	0	0	0	0.929	0.893	0	0.779	0.998
PGUG_01951	PGUG_05417	1857042	1853159	4929.XP_001486280.1	4929.XP_001482397.1	0.098	0	0	0	0.976	0.893	0	0.619	0.998
PGUG_03389	PGUG_04670	1854770	1853477	4929.XP_001484008.1	4929.XP_001482715.1	0.076	0	0	0	0.935	0.814	0	0.888	0.998
PGUG_00207	PGUG_01505	1857592	1856596	4929.XP_001486830.1	4929.XP_001485834.1	0.336	0.367	0.310	0	0.971	0.088	0	0.892	0.998
PGUG_00294	PGUG_01282	1857679	1856373	4929.XP_001486917.1	4929.XP_001485611.1	0.176	0.061	0	0	0.684	0.268	0.900	0.914	0.998
PGUG_01063	PGUG_02450	1858448	1855483	4929.XP_001487686.1	4929.XP_001484721.1	0	0	0	0	0.212	0.987	0	0.886	0.998
PGUG_00379	PGUG_01877	1857765	1856967	4929.XP_001487003.1	4929.XP_001486205.1	0.162	0	0	0	0.945	0.893	0	0.740	0.998
PGUG_02798	PGUG_05491	1855831	1853233	4929.XP_001485069.1	4929.XP_001482471.1	0.176	0	0	0	0.929	0.893	0	0.755	0.998
PGUG_04207	PGUG_03990	1854240	1854023	4929.XP_001483478.1	4929.XP_001483261.1	0	0	0	0	0.929	0.893	0	0.776	0.998
PGUG_02798	PGUG_04375	1855831	1854408	4929.XP_001485069.1	4929.XP_001483646.1	0	0	0	0	0.929	0.893	0	0.771	0.998
PGUG_02028	PGUG_05491	1857119	1853233	4929.XP_001486357.1	4929.XP_001482471.1	0	0	0	0	0.929	0.982	0	0.216	0.998
PGUG_01180	PGUG_00150	1858565	1857535	4929.XP_001487803.1	4929.XP_001486773.1	0.089	0.239	0.351	0	0.580	0.726	0.900	0.813	0.998
UTP10	PGUG_03307	1855581	1854688	4929.XP_001484819.1	4929.XP_001483926.1	0	0	0	0	0.603	0.990	0	0.736	0.998
PGUG_02089	PGUG_04207	1857180	1854240	4929.XP_001486418.1	4929.XP_001483478.1	0	0	0	0	0.929	0.893	0	0.776	0.998
PGUG_00657	PGUG_04375	1858042	1854408	4929.XP_001487280.1	4929.XP_001483646.1	0	0	0.274	0	0.929	0.893	0	0.776	0.998
PGUG_00657	PGUG_05417	1858042	1853159	4929.XP_001487280.1	4929.XP_001482397.1	0.098	0	0	0	0.968	0.893	0	0.454	0.998
PGUG_02624	PGUG_02539	1855657	1855572	4929.XP_001484895.1	4929.XP_001484810.1	0.176	0	0.220	0	0.953	0.893	0	0.636	0.998
PGUG_02545	PGUG_02539	1855578	1855572	4929.XP_001484816.1	4929.XP_001484810.1	0.098	0	0.239	0	0.952	0.893	0	0.746	0.998
PGUG_01763	PGUG_03626	1856854	1855007	4929.XP_001486092.1	4929.XP_001484245.1	0.429	0.625	0	0	0.603	0.303	0.900	0.814	0.998
RPS0	RPS1	1855403	1853516	4929.XP_001484641.1	4929.XP_001482754.1	0.168	0	0	0	0.929	0.893	0	0.818	0.998
PGUG_00390	PGUG_05358	1857775	1853100	4929.XP_001487013.1	4929.XP_001482338.1	0.219	0	0	0	0.922	0	0.800	0.892	0.998
PGUG_01877	PGUG_05105	1856967	1853912	4929.XP_001486205.1	4929.XP_001483150.1	0.176	0	0	0	0.964	0.893	0	0.566	0.998
PGUG_02658	PGUG_03638	1855691	1855018	4929.XP_001484929.1	4929.XP_001484256.1	0.098	0	0	0	0.929	0.893	0	0.778	0.998
PGUG_02798	PGUG_02545	1855831	1855578	4929.XP_001485069.1	4929.XP_001484816.1	0.175	0	0	0	0.929	0.893	0	0.746	0.998
PGUG_00756	PGUG_02119	1858141	1857210	4929.XP_001487379.1	4929.XP_001486448.1	0	0	0	0	0.736	0.954	0	0.892	0.998
PGUG_00657	PGUG_03990	1858042	1854023	4929.XP_001487280.1	4929.XP_001483261.1	0.098	0	0	0	0.929	0.893	0	0.770	0.998
PGUG_02798	PGUG_02539	1855831	1855572	4929.XP_001485069.1	4929.XP_001484810.1	0	0	0	0	0.929	0.893	0	0.780	0.998
PGUG_02766	RIB1	1855799	1854060	4929.XP_001485037.1	4929.XP_001483298.1	0.098	0.762	0.400	0	0.355	0	0.900	0.882	0.998
PGUG_00657	PGUG_05105	1858042	1853912	4929.XP_001487280.1	4929.XP_001483150.1	0.098	0	0	0	0.964	0.893	0	0.608	0.998
PGUG_05105	PGUG_05417	1853912	1853159	4929.XP_001483150.1	4929.XP_001482397.1	0.098	0	0	0	0.958	0.893	0	0.605	0.998
PGUG_02798	PGUG_05785	1855831	1852785	4929.XP_001485069.1	4929.XP_001482023.1	0	0	0	0	0.929	0.893	0	0.778	0.998
PGUG_00383	PGUG_04067	1857768	1854100	4929.XP_001487006.1	4929.XP_001483338.1	0.176	0	0	0	0.948	0.893	0	0.709	0.998
PGUG_00657	PGUG_02798	1858042	1855831	4929.XP_001487280.1	4929.XP_001485069.1	0	0	0	0	0.929	0.893	0	0.777	0.998
PGUG_02539	RPS0	1855572	1855403	4929.XP_001484810.1	4929.XP_001484641.1	0.094	0	0	0	0.956	0.893	0	0.706	0.998
PGUG_04408	PGUG_04207	1854441	1854240	4929.XP_001483679.1	4929.XP_001483478.1	0	0	0	0	0.929	0.893	0	0.782	0.998
RPS0	PGUG_05491	1855403	1853233	4929.XP_001484641.1	4929.XP_001482471.1	0.095	0	0	0	0.929	0.893	0	0.744	0.998
PGUG_00379	PGUG_02539	1857765	1855572	4929.XP_001487003.1	4929.XP_001484810.1	0.089	0	0.288	0	0.977	0.881	0	0.454	0.998
PGUG_00926	PGUG_05295	1858311	1853037	4929.XP_001487549.1	4929.XP_001482275.1	0.219	0	0	0	0.911	0.133	0.900	0.781	0.998
PGUG_02272	PGUG_01716	1857363	1856807	4929.XP_001486601.1	4929.XP_001486045.1	0.219	0	0	0	0.916	0.138	0.900	0.779	0.998
PGUG_00816	PGUG_01621	1858201	1856712	4929.XP_001487439.1	4929.XP_001485950.1	0.219	0	0	0	0.603	0.954	0	0.891	0.998
PGUG_05866	PGUG_05862	1852865	1852861	4929.XP_001482103.1	4929.XP_001482099.1	0.219	0.104	0.386	0	0.603	0.281	0.900	0.892	0.998
PGUG_04375	PGUG_04067	1854408	1854100	4929.XP_001483646.1	4929.XP_001483338.1	0.219	0	0	0	0.929	0.893	0	0.709	0.998
PGUG_01007	PGUG_03638	1858392	1855018	4929.XP_001487630.1	4929.XP_001484256.1	0	0	0	0	0.929	0.893	0	0.765	0.998
PGUG_00936	PGUG_00435	1858321	1857820	4929.XP_001487559.1	4929.XP_001487058.1	0	0	0	0	0.251	0.989	0	0.834	0.998
PGUG_01891	PGUG_05417	1856982	1853159	4929.XP_001486220.1	4929.XP_001482397.1	0.098	0	0	0	0.975	0.893	0	0.627	0.998
PGUG_02028	PGUG_04739	1857119	1853546	4929.XP_001486357.1	4929.XP_001482784.1	0	0	0	0	0.971	0.893	0	0.452	0.998
PGUG_04207	PGUG_05785	1854240	1852785	4929.XP_001483478.1	4929.XP_001482023.1	0.176	0	0	0	0.929	0.893	0	0.775	0.998
PGUG_02251	PGUG_01951	1857342	1857042	4929.XP_001486580.1	4929.XP_001486280.1	0.076	0	0	0	0.929	0.974	0	0.088	0.998
PGUG_04673	PGUG_05410	1853480	1853152	4929.XP_001482718.1	4929.XP_001482390.1	0	0	0	0	0.617	0.813	0.800	0.888	0.998
PGUG_03700	PGUG_05491	1855081	1853233	4929.XP_001484319.1	4929.XP_001482471.1	0	0	0	0	0.929	0.893	0	0.769	0.998
PGUG_02251	PGUG_01877	1857342	1856967	4929.XP_001486580.1	4929.XP_001486205.1	0.092	0	0	0	0.986	0.893	0	0.140	0.998
PGUG_01891	PGUG_04476	1856982	1854509	4929.XP_001486220.1	4929.XP_001483747.1	0	0	0	0	0.958	0.893	0	0.607	0.998
PGUG_01891	PGUG_04067	1856982	1854100	4929.XP_001486220.1	4929.XP_001483338.1	0.176	0	0	0	0.952	0.893	0	0.777	0.998
PGUG_04207	PGUG_04067	1854240	1854100	4929.XP_001483478.1	4929.XP_001483338.1	0	0	0	0	0.929	0.893	0	0.784	0.998
PGUG_04067	PGUG_05105	1854100	1853912	4929.XP_001483338.1	4929.XP_001483150.1	0.176	0	0	0	0.929	0.893	0	0.733	0.998
RPS1	PGUG_05491	1853516	1853233	4929.XP_001482754.1	4929.XP_001482471.1	0	0	0	0	0.929	0.983	0	0.113	0.998
PGUG_02028	PGUG_05417	1857119	1853159	4929.XP_001486357.1	4929.XP_001482397.1	0	0	0	0	0.929	0.984	0	0.088	0.998
PGUG_01095	PGUG_02383	1858480	1855416	4929.XP_001487718.1	4929.XP_001484654.1	0.219	0.635	0	0	0.624	0	0.900	0.889	0.998
PGUG_02798	PGUG_03700	1855831	1855081	4929.XP_001485069.1	4929.XP_001484319.1	0	0	0	0	0.929	0.893	0	0.776	0.998
PGUG_00562	PGUG_01321	1857947	1856412	4929.XP_001487185.1	4929.XP_001485650.1	0	0	0	0	0.441	0.893	0.800	0.891	0.998
PGUG_05009	PGUG_05697	1853816	1852696	4929.XP_001483054.1	4929.XP_001481934.1	0	0	0	0	0.162	0.985	0	0.892	0.998
PGUG_01171	PGUG_02539	1858556	1855572	4929.XP_001487794.1	4929.XP_001484810.1	0.076	0	0.307	0	0.929	0.893	0	0.744	0.998
PGUG_01891	PGUG_01877	1856982	1856967	4929.XP_001486220.1	4929.XP_001486205.1	0.176	0	0	0	0.978	0.893	0	0.237	0.998
UTP10	PGUG_05474	1855581	1853216	4929.XP_001484819.1	4929.XP_001482454.1	0	0	0	0	0.722	0.990	0	0.623	0.998
PGUG_00719	PGUG_04408	1858104	1854441	4929.XP_001487342.1	4929.XP_001483679.1	0	0	0	0	0.929	0.893	0	0.751	0.997
PGUG_00383	PGUG_05491	1857768	1853233	4929.XP_001487006.1	4929.XP_001482471.1	0.098	0	0	0	0.929	0.893	0	0.723	0.997
PGUG_00383	PGUG_05105	1857768	1853912	4929.XP_001487006.1	4929.XP_001483150.1	0.098	0	0	0	0.929	0.893	0	0.660	0.997
RPS0	PGUG_03700	1855403	1855081	4929.XP_001484641.1	4929.XP_001484319.1	0	0	0	0	0.929	0.893	0	0.709	0.997
PGUG_00719	PGUG_01951	1858104	1857042	4929.XP_001487342.1	4929.XP_001486280.1	0	0	0	0	0.929	0.893	0	0.731	0.997
PGUG_02089	PGUG_01951	1857180	1857042	4929.XP_001486418.1	4929.XP_001486280.1	0	0	0	0	0.929	0.893	0	0.664	0.997
PGUG_01877	PGUG_02797	1856967	1855830	4929.XP_001486205.1	4929.XP_001485068.1	0	0	0	0	0.938	0.893	0	0.597	0.997
PGUG_03619	PGUG_04739	1855000	1853546	4929.XP_001484238.1	4929.XP_001482784.1	0	0	0	0	0.929	0.893	0	0.725	0.997
PGUG_02658	PGUG_04375	1855691	1854408	4929.XP_001484929.1	4929.XP_001483646.1	0.176	0	0	0	0.929	0.893	0	0.711	0.997
PGUG_01877	PGUG_04672	1856967	1853479	4929.XP_001486205.1	4929.XP_001482717.1	0	0	0	0	0	0.982	0	0.884	0.997
PGUG_00379	PGUG_03990	1857765	1854023	4929.XP_001487003.1	4929.XP_001483261.1	0.089	0	0	0	0.929	0.893	0	0.731	0.997
PGUG_01877	PGUG_04739	1856967	1853546	4929.XP_001486205.1	4929.XP_001482784.1	0	0	0	0	0.977	0.893	0	0.102	0.997
PGUG_01405	PGUG_05240	1856496	1852982	4929.XP_001485734.1	4929.XP_001482220.1	0.219	0	0	0	0.744	0	0.900	0.892	0.997
PGUG_00719	PGUG_03816	1858104	1855197	4929.XP_001487342.1	4929.XP_001484435.1	0	0	0	0	0.929	0.893	0	0.731	0.997
PGUG_01877	PGUG_03638	1856967	1855018	4929.XP_001486205.1	4929.XP_001484256.1	0.176	0	0	0	0.929	0.893	0	0.608	0.997
PGUG_00657	PGUG_02658	1858042	1855691	4929.XP_001487280.1	4929.XP_001484929.1	0.098	0	0	0	0.929	0.893	0	0.631	0.997
PGUG_00657	PGUG_04408	1858042	1854441	4929.XP_001487280.1	4929.XP_001483679.1	0	0	0	0	0.929	0.893	0	0.637	0.997
PGUG_02545	PGUG_03990	1855578	1854023	4929.XP_001484816.1	4929.XP_001483261.1	0.098	0	0	0	0.929	0.893	0	0.683	0.997
PGUG_04079	PGUG_05746	1854112	1852745	4929.XP_001483350.1	4929.XP_001481983.1	0	0	0.457	0.813	0.929	0.954	0	0.781	0.997
PGUG_00719	PGUG_02798	1858104	1855831	4929.XP_001487342.1	4929.XP_001485069.1	0	0	0	0	0.929	0.893	0	0.676	0.997
PGUG_05417	PGUG_05785	1853159	1852785	4929.XP_001482397.1	4929.XP_001482023.1	0.098	0	0	0	0.929	0.893	0	0.696	0.997
PGUG_01877	PGUG_03619	1856967	1855000	4929.XP_001486205.1	4929.XP_001484238.1	0.176	0	0	0	0.929	0.893	0	0.605	0.997
PGUG_01951	PGUG_03700	1857042	1855081	4929.XP_001486280.1	4929.XP_001484319.1	0	0	0	0	0.952	0.893	0	0.606	0.997
PGUG_00379	PGUG_05105	1857765	1853912	4929.XP_001487003.1	4929.XP_001483150.1	0.089	0	0.205	0	0.929	0.893	0	0.546	0.997
PGUG_02539	PGUG_04207	1855572	1854240	4929.XP_001484810.1	4929.XP_001483478.1	0	0	0	0	0.929	0.893	0	0.739	0.997
PGUG_01877	PGUG_03700	1856967	1855081	4929.XP_001486205.1	4929.XP_001484319.1	0	0	0	0	0.929	0.893	0	0.731	0.997
PGUG_04067	RPS1	1854100	1853516	4929.XP_001483338.1	4929.XP_001482754.1	0	0	0	0	0.929	0.893	0	0.749	0.997
PGUG_00657	PGUG_02624	1858042	1855657	4929.XP_001487280.1	4929.XP_001484895.1	0.176	0	0	0	0.929	0.893	0	0.606	0.997
PGUG_01505	PGUG_05628	1856596	1853370	4929.XP_001485834.1	4929.XP_001482608.1	0.197	0	0	0	0.976	0	0	0.892	0.997
PGUG_02797	PGUG_04067	1855830	1854100	4929.XP_001485068.1	4929.XP_001483338.1	0	0	0	0	0.929	0.893	0	0.731	0.997
PGUG_04294	PGUG_05474	1854327	1853216	4929.XP_001483565.1	4929.XP_001482454.1	0	0	0	0	0.961	0.716	0	0.781	0.997
PGUG_03816	PGUG_03638	1855197	1855018	4929.XP_001484435.1	4929.XP_001484256.1	0	0	0	0	0.929	0.893	0	0.757	0.997
PGUG_02089	PGUG_02798	1857180	1855831	4929.XP_001486418.1	4929.XP_001485069.1	0	0	0	0	0.929	0.893	0	0.744	0.997
PGUG_02545	PGUG_03816	1855578	1855197	4929.XP_001484816.1	4929.XP_001484435.1	0	0	0.235	0	0.929	0.893	0	0.607	0.997
PGUG_01007	PGUG_01891	1858392	1856982	4929.XP_001487630.1	4929.XP_001486220.1	0	0	0	0	0.929	0.893	0	0.682	0.997
PGUG_00379	PGUG_05417	1857765	1853159	4929.XP_001487003.1	4929.XP_001482397.1	0.089	0	0	0	0.973	0.893	0	0.321	0.997
PGUG_01465	PGUG_04375	1856556	1854408	4929.XP_001485794.1	4929.XP_001483646.1	0.176	0	0.279	0	0.929	0.893	0	0.439	0.997
PGUG_04375	PGUG_03990	1854408	1854023	4929.XP_001483646.1	4929.XP_001483261.1	0.176	0	0	0	0.929	0.893	0	0.695	0.997
PGUG_01877	PGUG_04207	1856967	1854240	4929.XP_001486205.1	4929.XP_001483478.1	0	0	0	0	0.929	0.893	0	0.725	0.997
PGUG_02798	PGUG_04067	1855831	1854100	4929.XP_001485069.1	4929.XP_001483338.1	0	0	0	0	0.929	0.893	0	0.709	0.997
PGUG_02658	PGUG_04408	1855691	1854441	4929.XP_001484929.1	4929.XP_001483679.1	0	0	0	0	0.929	0.893	0	0.702	0.997
PGUG_02798	PGUG_02658	1855831	1855691	4929.XP_001485069.1	4929.XP_001484929.1	0	0	0	0	0.929	0.893	0	0.744	0.997
PGUG_01891	PGUG_05491	1856982	1853233	4929.XP_001486220.1	4929.XP_001482471.1	0.098	0	0	0	0.929	0.893	0	0.733	0.997
PGUG_00379	PGUG_05785	1857765	1852785	4929.XP_001487003.1	4929.XP_001482023.1	0.089	0	0.205	0	0.929	0.885	0	0.608	0.997
PGUG_01891	RPS1	1856982	1853516	4929.XP_001486220.1	4929.XP_001482754.1	0	0	0	0	0.929	0.893	0	0.665	0.997
PGUG_01171	PGUG_00512	1858556	1857897	4929.XP_001487794.1	4929.XP_001487135.1	0	0	0	0	0.047	0.984	0	0.833	0.997
PGUG_00719	PGUG_02089	1858104	1857180	4929.XP_001487342.1	4929.XP_001486418.1	0	0	0	0	0.929	0.893	0	0.731	0.997
PGUG_02028	PGUG_01877	1857119	1856967	4929.XP_001486357.1	4929.XP_001486205.1	0	0	0	0	0.974	0.893	0	0.218	0.997
PGUG_02089	PGUG_04375	1857180	1854408	4929.XP_001486418.1	4929.XP_001483646.1	0	0	0	0	0.929	0.893	0	0.748	0.997
PGUG_03638	PGUG_05491	1855018	1853233	4929.XP_001484256.1	4929.XP_001482471.1	0.089	0	0	0	0.929	0.893	0	0.624	0.997
PGUG_04067	PGUG_05785	1854100	1852785	4929.XP_001483338.1	4929.XP_001482023.1	0.176	0	0	0	0.929	0.893	0	0.709	0.997
PGUG_00936	PGUG_00924	1858321	1858309	4929.XP_001487559.1	4929.XP_001487547.1	0	0	0	0	0.138	0.870	0.800	0.892	0.997
RPS0	PGUG_03619	1855403	1855000	4929.XP_001484641.1	4929.XP_001484238.1	0.098	0	0	0	0.929	0.893	0	0.635	0.997
PGUG_02658	PGUG_05785	1855691	1852785	4929.XP_001484929.1	4929.XP_001482023.1	0.098	0	0	0	0.929	0.893	0	0.707	0.997
PGUG_00363	PGUG_02089	1857748	1857180	4929.XP_001486986.1	4929.XP_001486418.1	0	0	0	0	0.919	0.893	0	0.746	0.997
PGUG_01951	RPS0	1857042	1855403	4929.XP_001486280.1	4929.XP_001484641.1	0.096	0	0	0	0.951	0.893	0	0.609	0.997
UTR4	MDE1	1856196	1855893	4929.XP_001485434.1	4929.XP_001485131.1	0.098	0.681	0.394	0	0.054	0	0.900	0.882	0.997
PGUG_03990	PGUG_05105	1854023	1853912	4929.XP_001483261.1	4929.XP_001483150.1	0.098	0	0	0	0.929	0.893	0	0.616	0.997
PGUG_00390	PGUG_00035	1857775	1857420	4929.XP_001487013.1	4929.XP_001486658.1	0.219	0	0	0	0.830	0.122	0.900	0.799	0.997
PGUG_01891	PGUG_04375	1856982	1854408	4929.XP_001486220.1	4929.XP_001483646.1	0.176	0	0	0	0.929	0.893	0	0.697	0.997
PGUG_01007	PGUG_04408	1858392	1854441	4929.XP_001487630.1	4929.XP_001483679.1	0	0	0	0	0.929	0.893	0	0.709	0.997
PGUG_00756	PGUG_04960	1858141	1853767	4929.XP_001487379.1	4929.XP_001483005.1	0	0	0	0	0.830	0.880	0	0.891	0.997
PGUG_01171	PGUG_04067	1858556	1854100	4929.XP_001487794.1	4929.XP_001483338.1	0.095	0	0	0	0.929	0.893	0	0.672	0.997
PGUG_01171	PGUG_03990	1858556	1854023	4929.XP_001487794.1	4929.XP_001483261.1	0.076	0	0	0	0.929	0.893	0	0.629	0.997
PGUG_01007	PGUG_04375	1858392	1854408	4929.XP_001487630.1	4929.XP_001483646.1	0	0	0	0	0.929	0.893	0	0.749	0.997
EGD1	EGD2	1856948	1855473	4929.XP_001486186.1	4929.XP_001484711.1	0	0	0	0	0.905	0.880	0	0.779	0.997
RPS0	PGUG_04207	1855403	1854240	4929.XP_001484641.1	4929.XP_001483478.1	0	0	0	0	0.929	0.893	0	0.709	0.997
PGUG_00719	PGUG_01891	1858104	1856982	4929.XP_001487342.1	4929.XP_001486220.1	0	0	0	0	0.929	0.893	0	0.709	0.997
PGUG_03140	PGUG_03123	1856173	1856156	4929.XP_001485411.1	4929.XP_001485394.1	0.219	0.383	0.301	0	0.734	0.137	0.900	0.787	0.997
PGUG_02539	PGUG_04476	1855572	1854509	4929.XP_001484810.1	4929.XP_001483747.1	0	0	0	0	0.965	0.893	0	0.503	0.997
PGUG_04408	PGUG_04375	1854441	1854408	4929.XP_001483679.1	4929.XP_001483646.1	0	0	0	0	0.929	0.893	0	0.731	0.997
PGUG_01505	PGUG_05396	1856596	1853138	4929.XP_001485834.1	4929.XP_001482376.1	0.336	0	0	0	0.740	0	0.900	0.892	0.997
PGUG_00379	RPS0	1857765	1855403	4929.XP_001487003.1	4929.XP_001484641.1	0	0	0	0	0.929	0.893	0	0.637	0.997
PGUG_01171	PGUG_00719	1858556	1858104	4929.XP_001487794.1	4929.XP_001487342.1	0	0	0	0	0.929	0.893	0	0.727	0.997
PGUG_02798	PGUG_03990	1855831	1854023	4929.XP_001485069.1	4929.XP_001483261.1	0	0	0	0	0.929	0.893	0	0.709	0.997
PGUG_01007	PGUG_01951	1858392	1857042	4929.XP_001487630.1	4929.XP_001486280.1	0	0	0	0	0.962	0.893	0	0.443	0.997
PGUG_01171	PGUG_04739	1858556	1853546	4929.XP_001487794.1	4929.XP_001482784.1	0	0	0	0	0.929	0.880	0	0.753	0.997
PGUG_04408	PGUG_05491	1854441	1853233	4929.XP_001483679.1	4929.XP_001482471.1	0	0	0	0	0.929	0.893	0	0.696	0.997
PGUG_02658	RPS0	1855691	1855403	4929.XP_001484929.1	4929.XP_001484641.1	0.089	0	0	0	0.929	0.893	0	0.677	0.997
PGUG_03816	PGUG_05491	1855197	1853233	4929.XP_001484435.1	4929.XP_001482471.1	0	0	0	0	0.929	0.893	0	0.711	0.997
PGUG_01084	PGUG_01621	1858469	1856712	4929.XP_001487707.1	4929.XP_001485950.1	0	0	0	0	0.641	0.954	0	0.867	0.997
PGUG_01951	PGUG_04207	1857042	1854240	4929.XP_001486280.1	4929.XP_001483478.1	0	0	0	0	0.929	0.893	0	0.749	0.997
PGUG_02658	PGUG_02539	1855691	1855572	4929.XP_001484929.1	4929.XP_001484810.1	0.098	0	0	0	0.929	0.893	0	0.705	0.997
PGUG_02797	PGUG_02658	1855830	1855691	4929.XP_001485068.1	4929.XP_001484929.1	0	0	0	0	0.929	0.893	0	0.660	0.997
PGUG_01007	PGUG_00379	1858392	1857765	4929.XP_001487630.1	4929.XP_001487003.1	0	0	0	0	0.960	0.893	0	0.475	0.997
PGUG_04207	PGUG_05417	1854240	1853159	4929.XP_001483478.1	4929.XP_001482397.1	0	0	0.310	0	0.929	0.893	0	0.624	0.997
RPS0	PGUG_04408	1855403	1854441	4929.XP_001484641.1	4929.XP_001483679.1	0	0	0	0	0.929	0.893	0	0.731	0.997
PGUG_01877	PGUG_02658	1856967	1855691	4929.XP_001486205.1	4929.XP_001484929.1	0.176	0	0	0	0.929	0.893	0	0.606	0.997
PGUG_00719	PGUG_04207	1858104	1854240	4929.XP_001487342.1	4929.XP_001483478.1	0.219	0	0	0	0.929	0.893	0	0.635	0.997
RPS0	PGUG_04067	1855403	1854100	4929.XP_001484641.1	4929.XP_001483338.1	0.162	0	0	0	0.935	0.893	0	0.640	0.997
PGUG_00657	RPS1	1858042	1853516	4929.XP_001487280.1	4929.XP_001482754.1	0	0	0	0	0.929	0.893	0	0.662	0.997
PGUG_03596	PGUG_04079	1854977	1854112	4929.XP_001484215.1	4929.XP_001483350.1	0	0	0	0	0.929	0.885	0	0.708	0.997
PGUG_01951	PGUG_03619	1857042	1855000	4929.XP_001486280.1	4929.XP_001484238.1	0.098	0	0	0	0.937	0.893	0	0.628	0.997
PGUG_02624	PGUG_05417	1855657	1853159	4929.XP_001484895.1	4929.XP_001482397.1	0.176	0	0	0	0.935	0.893	0	0.545	0.997
PGUG_02545	PGUG_03700	1855578	1855081	4929.XP_001484816.1	4929.XP_001484319.1	0	0	0	0	0.929	0.893	0	0.731	0.997
PGUG_04476	PGUG_04408	1854509	1854441	4929.XP_001483747.1	4929.XP_001483679.1	0	0	0.237	0	0.929	0.893	0	0.546	0.997
PGUG_02539	PGUG_03990	1855572	1854023	4929.XP_001484810.1	4929.XP_001483261.1	0.098	0	0	0	0.929	0.893	0	0.616	0.997
PGUG_00719	PGUG_04067	1858104	1854100	4929.XP_001487342.1	4929.XP_001483338.1	0	0	0	0	0.929	0.893	0	0.750	0.997
PGUG_00569	PGUG_03114	1857954	1856147	4929.XP_001487192.1	4929.XP_001485385.1	0	0	0	0	0.110	0.893	0.800	0.892	0.997
PGUG_01007	RPS0	1858392	1855403	4929.XP_001487630.1	4929.XP_001484641.1	0	0	0	0	0.964	0.893	0	0.495	0.997
PGUG_00379	PGUG_02545	1857765	1855578	4929.XP_001487003.1	4929.XP_001484816.1	0.089	0	0	0	0.969	0.886	0	0.353	0.997
PGUG_03638	PGUG_04067	1855018	1854100	4929.XP_001484256.1	4929.XP_001483338.1	0.176	0	0	0	0.929	0.890	0	0.686	0.997
PGUG_01895	PGUG_03043	1856986	1856076	4929.XP_001486224.1	4929.XP_001485314.1	0	0.773	0	0	0.125	0.893	0	0.892	0.997
PGUG_03816	PGUG_04739	1855197	1853546	4929.XP_001484435.1	4929.XP_001482784.1	0	0	0	0	0.954	0.893	0	0.620	0.997
PGUG_00657	PGUG_03816	1858042	1855197	4929.XP_001487280.1	4929.XP_001484435.1	0	0	0.228	0	0.929	0.893	0	0.609	0.997
PGUG_00979	PGUG_03596	1858364	1854977	4929.XP_001487602.1	4929.XP_001484215.1	0	0	0	0	0.923	0.888	0	0.777	0.997
PGUG_00383	PGUG_03638	1857768	1855018	4929.XP_001487006.1	4929.XP_001484256.1	0.098	0	0	0	0.929	0.893	0	0.731	0.997
PGUG_02658	PGUG_02545	1855691	1855578	4929.XP_001484929.1	4929.XP_001484816.1	0.098	0	0	0	0.929	0.893	0	0.655	0.997
PGUG_01951	PGUG_05491	1857042	1853233	4929.XP_001486280.1	4929.XP_001482471.1	0.098	0	0	0	0.929	0.893	0	0.620	0.997
PGUG_01007	PGUG_04207	1858392	1854240	4929.XP_001487630.1	4929.XP_001483478.1	0	0	0	0	0.929	0.893	0	0.694	0.997
UTP10	PGUG_05282	1855581	1853024	4929.XP_001484819.1	4929.XP_001482262.1	0	0	0	0	0.971	0.749	0	0.681	0.997
PGUG_02658	PGUG_05491	1855691	1853233	4929.XP_001484929.1	4929.XP_001482471.1	0.098	0	0	0	0.929	0.893	0	0.709	0.997
PGUG_01084	PGUG_01723	1858469	1856814	4929.XP_001487707.1	4929.XP_001486052.1	0	0	0	0	0.737	0.954	0	0.780	0.997
PGUG_03816	PGUG_04207	1855197	1854240	4929.XP_001484435.1	4929.XP_001483478.1	0	0	0	0	0.929	0.893	0	0.702	0.997
PGUG_01465	PGUG_04739	1856556	1853546	4929.XP_001485794.1	4929.XP_001482784.1	0	0	0	0	0.957	0.893	0	0.553	0.997
PGUG_02658	PGUG_05417	1855691	1853159	4929.XP_001484929.1	4929.XP_001482397.1	0.098	0	0	0	0.929	0.893	0	0.696	0.997
PGUG_01951	PGUG_04408	1857042	1854441	4929.XP_001486280.1	4929.XP_001483679.1	0	0	0	0	0.929	0.893	0	0.657	0.997
PGUG_00379	PGUG_01951	1857765	1857042	4929.XP_001487003.1	4929.XP_001486280.1	0.089	0	0	0	0.970	0.893	0	0.127	0.997
PGUG_02545	PGUG_05491	1855578	1853233	4929.XP_001484816.1	4929.XP_001482471.1	0.098	0	0	0	0.929	0.893	0	0.667	0.997
PGUG_02798	PGUG_03619	1855831	1855000	4929.XP_001485069.1	4929.XP_001484238.1	0.175	0	0	0	0.929	0.893	0	0.615	0.997
PGUG_02624	PGUG_04375	1855657	1854408	4929.XP_001484895.1	4929.XP_001483646.1	0.219	0	0.366	0	0.929	0.893	0	0.547	0.997
BNA5	BNA1	1854425	1854297	4929.XP_001483663.1	4929.XP_001483535.1	0	0	0.452	0	0.612	0	0.900	0.892	0.997
PGUG_02744	PGUG_03619	1855777	1855000	4929.XP_001485015.1	4929.XP_001484238.1	0.098	0	0	0	0.929	0.893	0	0.673	0.997
PGUG_00379	PGUG_00363	1857765	1857748	4929.XP_001487003.1	4929.XP_001486986.1	0	0	0	0	0.966	0.893	0	0.478	0.997
PGUG_02251	PGUG_01891	1857342	1856982	4929.XP_001486580.1	4929.XP_001486220.1	0.054	0	0	0	0.974	0.893	0	0.084	0.997
PGUG_02089	RPS1	1857180	1853516	4929.XP_001486418.1	4929.XP_001482754.1	0	0	0	0	0.929	0.893	0	0.709	0.997
PGUG_02744	PGUG_04067	1855777	1854100	4929.XP_001485015.1	4929.XP_001483338.1	0.176	0	0	0	0.929	0.893	0	0.607	0.997
PGUG_02089	PGUG_03990	1857180	1854023	4929.XP_001486418.1	4929.XP_001483261.1	0	0	0	0	0.929	0.893	0	0.731	0.997
PGUG_00363	PGUG_05417	1857748	1853159	4929.XP_001486986.1	4929.XP_001482397.1	0	0	0	0	0.968	0.893	0	0.218	0.997
PGUG_00719	PGUG_02744	1858104	1855777	4929.XP_001487342.1	4929.XP_001485015.1	0	0	0	0	0.929	0.893	0	0.700	0.997
PGUG_02539	PGUG_05105	1855572	1853912	4929.XP_001484810.1	4929.XP_001483150.1	0.098	0	0.217	0	0.929	0.893	0	0.606	0.997
PGUG_00657	PGUG_04476	1858042	1854509	4929.XP_001487280.1	4929.XP_001483747.1	0	0	0	0	0.954	0.893	0	0.564	0.997
PGUG_00719	PGUG_05785	1858104	1852785	4929.XP_001487342.1	4929.XP_001482023.1	0.176	0	0	0	0.929	0.893	0	0.658	0.997
PGUG_02089	PGUG_04408	1857180	1854441	4929.XP_001486418.1	4929.XP_001483679.1	0	0	0	0	0.929	0.893	0	0.745	0.997
PGUG_01877	PGUG_04476	1856967	1854509	4929.XP_001486205.1	4929.XP_001483747.1	0	0	0	0	0.975	0.893	0	0.239	0.997
PGUG_02658	PGUG_04067	1855691	1854100	4929.XP_001484929.1	4929.XP_001483338.1	0.176	0	0	0	0.929	0.893	0	0.709	0.997
PGUG_03816	PGUG_04408	1855197	1854441	4929.XP_001484435.1	4929.XP_001483679.1	0	0	0	0	0.929	0.893	0	0.749	0.997
PGUG_02251	PGUG_02798	1857342	1855831	4929.XP_001486580.1	4929.XP_001485069.1	0	0	0	0	0.954	0.893	0	0.605	0.997
PGUG_01891	PGUG_03990	1856982	1854023	4929.XP_001486220.1	4929.XP_001483261.1	0.098	0	0	0	0.929	0.893	0	0.633	0.997
PGUG_00383	PGUG_04207	1857768	1854240	4929.XP_001487006.1	4929.XP_001483478.1	0	0	0	0	0.929	0.893	0	0.693	0.997
PGUG_02539	PGUG_03619	1855572	1855000	4929.XP_001484810.1	4929.XP_001484238.1	0.098	0	0	0	0.929	0.893	0	0.731	0.997
PGUG_01877	PGUG_02545	1856967	1855578	4929.XP_001486205.1	4929.XP_001484816.1	0.176	0	0	0	0.929	0.886	0	0.704	0.997
PGUG_02545	PGUG_04375	1855578	1854408	4929.XP_001484816.1	4929.XP_001483646.1	0	0	0	0	0.929	0.893	0	0.709	0.997
PGUG_00383	PGUG_05417	1857768	1853159	4929.XP_001487006.1	4929.XP_001482397.1	0.098	0	0	0	0.929	0.893	0	0.668	0.997
PGUG_03700	PGUG_04067	1855081	1854100	4929.XP_001484319.1	4929.XP_001483338.1	0	0	0	0	0.929	0.893	0	0.749	0.997
PGUG_02658	PGUG_02624	1855691	1855657	4929.XP_001484929.1	4929.XP_001484895.1	0.176	0	0	0	0.929	0.893	0	0.605	0.997
PGUG_03990	PGUG_05491	1854023	1853233	4929.XP_001483261.1	4929.XP_001482471.1	0.098	0	0	0	0.929	0.893	0	0.701	0.997
PGUG_01007	PGUG_00383	1858392	1857768	4929.XP_001487630.1	4929.XP_001487006.1	0	0	0	0	0.929	0.893	0	0.744	0.997
RPS0	PGUG_03638	1855403	1855018	4929.XP_001484641.1	4929.XP_001484256.1	0	0	0	0	0.929	0.889	0	0.667	0.997
PGUG_01057	PGUG_01437	1858442	1856528	4929.XP_001487680.1	4929.XP_001485766.1	0	0	0	0	0.054	0.986	0	0.854	0.997
PGUG_00657	PGUG_01891	1858042	1856982	4929.XP_001487280.1	4929.XP_001486220.1	0.098	0	0	0	0.929	0.893	0	0.623	0.997
PGUG_00730	PGUG_03982	1858115	1854015	4929.XP_001487353.1	4929.XP_001483253.1	0.176	0	0	0	0.647	0.264	0.900	0.891	0.997
PGUG_02539	PGUG_03700	1855572	1855081	4929.XP_001484810.1	4929.XP_001484319.1	0	0	0	0	0.929	0.893	0	0.729	0.997
PGUG_03638	PGUG_04207	1855018	1854240	4929.XP_001484256.1	4929.XP_001483478.1	0	0	0	0	0.929	0.893	0	0.637	0.997
PGUG_02798	PGUG_02744	1855831	1855777	4929.XP_001485069.1	4929.XP_001485015.1	0	0	0	0	0.929	0.893	0	0.731	0.997
PGUG_04375	RPS1	1854408	1853516	4929.XP_001483646.1	4929.XP_001482754.1	0	0	0	0	0.929	0.893	0	0.659	0.997
PGUG_00657	PGUG_05785	1858042	1852785	4929.XP_001487280.1	4929.XP_001482023.1	0.098	0	0	0	0.929	0.893	0	0.709	0.997
PGUG_01877	PGUG_03990	1856967	1854023	4929.XP_001486205.1	4929.XP_001483261.1	0.176	0	0	0	0.929	0.893	0	0.629	0.997
PGUG_02744	PGUG_03638	1855777	1855018	4929.XP_001485015.1	4929.XP_001484256.1	0	0	0	0	0.929	0.893	0	0.652	0.997
PGUG_01877	PGUG_01465	1856967	1856556	4929.XP_001486205.1	4929.XP_001485794.1	0.176	0	0	0	0.965	0.893	0	0.237	0.997
PGUG_00936	PGUG_03239	1858321	1856272	4929.XP_001487559.1	4929.XP_001485510.1	0	0	0	0	0.253	0.893	0.800	0.886	0.997
PGUG_02798	PGUG_03816	1855831	1855197	4929.XP_001485069.1	4929.XP_001484435.1	0	0	0	0	0.929	0.893	0	0.731	0.997
PGUG_03700	PGUG_03990	1855081	1854023	4929.XP_001484319.1	4929.XP_001483261.1	0	0	0	0	0.928	0.893	0	0.607	0.996
PGUG_04207	PGUG_05105	1854240	1853912	4929.XP_001483478.1	4929.XP_001483150.1	0	0	0	0	0.929	0.893	0	0.566	0.996
PGUG_02251	PGUG_05491	1857342	1853233	4929.XP_001486580.1	4929.XP_001482471.1	0.076	0	0	0	0.929	0.893	0	0.615	0.996
PGUG_02744	PGUG_04375	1855777	1854408	4929.XP_001485015.1	4929.XP_001483646.1	0.172	0	0	0	0.929	0.893	0	0.445	0.996
PGUG_02624	PGUG_03638	1855657	1855018	4929.XP_001484895.1	4929.XP_001484256.1	0.176	0	0	0	0.929	0.893	0	0.446	0.996
PGUG_04408	PGUG_05417	1854441	1853159	4929.XP_001483679.1	4929.XP_001482397.1	0	0	0	0	0.929	0.893	0	0.614	0.996
PGUG_00719	PGUG_03700	1858104	1855081	4929.XP_001487342.1	4929.XP_001484319.1	0	0	0	0	0.929	0.893	0	0.616	0.996
PGUG_02539	PGUG_03816	1855572	1855197	4929.XP_001484810.1	4929.XP_001484435.1	0	0	0.417	0	0.929	0.893	0	0.335	0.996
PGUG_03638	RPS1	1855018	1853516	4929.XP_001484256.1	4929.XP_001482754.1	0	0	0	0	0.929	0.893	0	0.622	0.996
PGUG_02089	PGUG_02744	1857180	1855777	4929.XP_001486418.1	4929.XP_001485015.1	0	0	0	0	0.929	0.893	0	0.606	0.996
PGUG_02545	PGUG_03619	1855578	1855000	4929.XP_001484816.1	4929.XP_001484238.1	0.098	0	0	0	0.929	0.893	0	0.609	0.996
PGUG_01891	PGUG_02797	1856982	1855830	4929.XP_001486220.1	4929.XP_001485068.1	0	0	0	0	0.929	0.893	0	0.634	0.996
PGUG_00814	PGUG_00438	1858199	1857823	4929.XP_001487437.1	4929.XP_001487061.1	0	0	0	0	0.754	0.954	0	0.708	0.996
PGUG_02539	PGUG_03638	1855572	1855018	4929.XP_001484810.1	4929.XP_001484256.1	0.098	0	0	0	0.929	0.886	0	0.618	0.996
PGUG_01891	PGUG_04408	1856982	1854441	4929.XP_001486220.1	4929.XP_001483679.1	0	0	0	0	0.929	0.893	0	0.614	0.996
PGUG_02089	PGUG_03700	1857180	1855081	4929.XP_001486418.1	4929.XP_001484319.1	0	0	0	0	0.929	0.893	0	0.555	0.996
PGUG_01007	PGUG_02624	1858392	1855657	4929.XP_001487630.1	4929.XP_001484895.1	0	0	0	0	0.929	0.893	0	0.612	0.996
PGUG_00383	PGUG_03816	1857768	1855197	4929.XP_001487006.1	4929.XP_001484435.1	0	0	0	0	0.929	0.893	0	0.636	0.996
PGUG_03700	PGUG_05785	1855081	1852785	4929.XP_001484319.1	4929.XP_001482023.1	0	0	0	0	0.924	0.893	0	0.627	0.996
PGUG_03816	PGUG_03619	1855197	1855000	4929.XP_001484435.1	4929.XP_001484238.1	0	0	0	0	0.929	0.893	0	0.611	0.996
PGUG_02624	PGUG_03816	1855657	1855197	4929.XP_001484895.1	4929.XP_001484435.1	0	0	0.368	0	0.929	0.893	0	0.292	0.996
PGUG_02798	RPS0	1855831	1855403	4929.XP_001485069.1	4929.XP_001484641.1	0	0	0	0	0.929	0.893	0	0.614	0.996
PGUG_02658	RPS1	1855691	1853516	4929.XP_001484929.1	4929.XP_001482754.1	0	0	0	0	0.929	0.893	0	0.631	0.996
PGUG_02624	PGUG_04207	1855657	1854240	4929.XP_001484895.1	4929.XP_001483478.1	0	0	0	0	0.929	0.893	0	0.604	0.996
PGUG_00979	PGUG_04079	1858364	1854112	4929.XP_001487602.1	4929.XP_001483350.1	0	0	0	0	0.929	0.893	0	0.630	0.996
PGUG_00379	PGUG_01891	1857765	1856982	4929.XP_001487003.1	4929.XP_001486220.1	0.089	0	0	0	0.929	0.893	0	0.607	0.996
PGUG_03596	PGUG_05746	1854977	1852745	4929.XP_001484215.1	4929.XP_001481983.1	0	0	0	0	0.905	0.889	0	0.709	0.996
PGUG_00657	PGUG_02797	1858042	1855830	4929.XP_001487280.1	4929.XP_001485068.1	0	0	0	0	0.929	0.893	0	0.532	0.996
PGUG_00383	PGUG_04375	1857768	1854408	4929.XP_001487006.1	4929.XP_001483646.1	0	0	0	0	0.929	0.893	0	0.544	0.996
PGUG_02545	PGUG_04408	1855578	1854441	4929.XP_001484816.1	4929.XP_001483679.1	0	0	0	0	0.929	0.893	0	0.625	0.996
PGUG_01007	PGUG_02797	1858392	1855830	4929.XP_001487630.1	4929.XP_001485068.1	0	0	0	0	0.929	0.893	0	0.601	0.996
PGUG_01723	PGUG_05463	1856814	1853205	4929.XP_001486052.1	4929.XP_001482443.1	0	0	0	0	0.724	0.954	0	0.780	0.996
PGUG_02798	PGUG_04476	1855831	1854509	4929.XP_001485069.1	4929.XP_001483747.1	0	0	0	0	0.962	0.893	0	0.217	0.996
PGUG_01007	PGUG_03990	1858392	1854023	4929.XP_001487630.1	4929.XP_001483261.1	0	0	0	0	0.929	0.893	0	0.606	0.996
PGUG_04375	PGUG_04207	1854408	1854240	4929.XP_001483646.1	4929.XP_001483478.1	0	0	0	0	0.929	0.893	0	0.556	0.996
PGUG_03700	PGUG_03638	1855081	1855018	4929.XP_001484319.1	4929.XP_001484256.1	0	0	0	0	0.929	0.893	0	0.552	0.996
PGUG_00719	PGUG_03990	1858104	1854023	4929.XP_001487342.1	4929.XP_001483261.1	0	0	0	0	0.929	0.893	0	0.631	0.996
PGUG_00379	PGUG_02798	1857765	1855831	4929.XP_001487003.1	4929.XP_001485069.1	0	0	0	0	0.929	0.893	0	0.609	0.996
PGUG_01007	PGUG_00719	1858392	1858104	4929.XP_001487630.1	4929.XP_001487342.1	0	0	0	0	0.929	0.893	0	0.607	0.996
PGUG_01171	PGUG_05785	1858556	1852785	4929.XP_001487794.1	4929.XP_001482023.1	0.076	0	0.299	0	0.900	0.893	0	0.544	0.996
PGUG_00816	PGUG_05463	1858201	1853205	4929.XP_001487439.1	4929.XP_001482443.1	0.219	0	0	0	0.640	0.954	0	0.776	0.996
PGUG_00729	PGUG_04123	1858114	1854156	4929.XP_001487352.1	4929.XP_001483394.1	0	0	0	0	0.734	0.893	0	0.892	0.996
PGUG_02797	PGUG_03816	1855830	1855197	4929.XP_001485068.1	4929.XP_001484435.1	0	0	0	0	0.929	0.893	0	0.632	0.996
PGUG_02744	PGUG_02658	1855777	1855691	4929.XP_001485015.1	4929.XP_001484929.1	0.098	0	0	0	0.929	0.893	0	0.603	0.996
PGUG_01007	PGUG_02658	1858392	1855691	4929.XP_001487630.1	4929.XP_001484929.1	0	0	0	0	0.929	0.893	0	0.547	0.996
PGUG_00939	PGUG_03145	1858324	1856178	4929.XP_001487562.1	4929.XP_001485416.1	0.176	0	0	0	0.575	0	0.900	0.914	0.996
PGUG_02089	PGUG_02539	1857180	1855572	4929.XP_001486418.1	4929.XP_001484810.1	0	0	0	0	0.917	0.893	0	0.610	0.996
PGUG_02089	PGUG_01891	1857180	1856982	4929.XP_001486418.1	4929.XP_001486220.1	0	0	0	0	0.929	0.893	0	0.618	0.996
PGUG_00657	PGUG_01877	1858042	1856967	4929.XP_001487280.1	4929.XP_001486205.1	0.176	0	0	0	0.942	0.893	0	0.444	0.996
PGUG_00719	PGUG_05417	1858104	1853159	4929.XP_001487342.1	4929.XP_001482397.1	0	0	0	0	0.929	0.893	0	0.616	0.996
PGUG_02119	PGUG_04538	1857210	1854571	4929.XP_001486448.1	4929.XP_001483809.1	0	0	0	0	0.708	0.893	0	0.889	0.996
PGUG_03638	PGUG_03990	1855018	1854023	4929.XP_001484256.1	4929.XP_001483261.1	0.098	0	0	0	0.929	0.893	0	0.545	0.996
PGUG_03700	PGUG_03619	1855081	1855000	4929.XP_001484319.1	4929.XP_001484238.1	0	0	0	0	0.929	0.893	0	0.618	0.996
PGUG_03990	RPS1	1854023	1853516	4929.XP_001483261.1	4929.XP_001482754.1	0	0	0	0	0.929	0.893	0	0.617	0.996
PGUG_01465	PGUG_02624	1856556	1855657	4929.XP_001485794.1	4929.XP_001484895.1	0.176	0	0	0	0.929	0.893	0	0.537	0.996
PGUG_04375	PGUG_05785	1854408	1852785	4929.XP_001483646.1	4929.XP_001482023.1	0	0	0	0	0.929	0.893	0	0.620	0.996
PGUG_01951	RPS1	1857042	1853516	4929.XP_001486280.1	4929.XP_001482754.1	0	0	0	0	0.929	0.893	0	0.546	0.996
PGUG_01109	PGUG_02908	1858494	1855941	4929.XP_001487732.1	4929.XP_001485179.1	0	0	0	0	0.967	0.269	0	0.873	0.996
PGUG_02028	PGUG_03700	1857119	1855081	4929.XP_001486357.1	4929.XP_001484319.1	0	0	0	0	0.929	0.893	0	0.606	0.996
PGUG_01465	PGUG_04067	1856556	1854100	4929.XP_001485794.1	4929.XP_001483338.1	0.176	0	0	0	0.952	0.893	0	0.285	0.996
PGUG_00756	PGUG_01327	1858141	1856418	4929.XP_001487379.1	4929.XP_001485656.1	0	0	0	0	0.762	0.893	0	0.887	0.996
PGUG_00383	PGUG_02545	1857768	1855578	4929.XP_001487006.1	4929.XP_001484816.1	0.098	0	0	0	0.929	0.893	0	0.612	0.996
PGUG_00719	PGUG_03638	1858104	1855018	4929.XP_001487342.1	4929.XP_001484256.1	0	0	0	0	0.929	0.893	0	0.623	0.996
PGUG_03700	PGUG_04476	1855081	1854509	4929.XP_001484319.1	4929.XP_001483747.1	0	0	0	0	0.929	0.893	0	0.630	0.996
PGUG_01465	PGUG_03816	1856556	1855197	4929.XP_001485794.1	4929.XP_001484435.1	0	0	0.348	0	0.948	0.893	0	0.176	0.996
PGUG_00383	RPS0	1857768	1855403	4929.XP_001487006.1	4929.XP_001484641.1	0.098	0	0	0	0.929	0.893	0	0.492	0.996
PGUG_02797	PGUG_03990	1855830	1854023	4929.XP_001485068.1	4929.XP_001483261.1	0	0	0	0	0.929	0.893	0	0.606	0.996
PGUG_00630	TMA22	1858015	1855537	4929.XP_001487253.1	4929.XP_001484775.1	0	0	0	0	0.736	0.893	0	0.889	0.996
PGUG_02089	PGUG_03816	1857180	1855197	4929.XP_001486418.1	4929.XP_001484435.1	0	0	0	0	0.929	0.893	0	0.557	0.996
PGUG_02251	PGUG_05417	1857342	1853159	4929.XP_001486580.1	4929.XP_001482397.1	0.076	0	0	0	0.929	0.893	0	0.612	0.996
PGUG_03816	PGUG_04067	1855197	1854100	4929.XP_001484435.1	4929.XP_001483338.1	0	0	0	0	0.929	0.893	0	0.612	0.996
PGUG_00390	PGUG_05295	1857775	1853037	4929.XP_001487013.1	4929.XP_001482275.1	0.219	0	0	0	0.811	0.049	0.900	0.772	0.996
PGUG_02797	PGUG_04207	1855830	1854240	4929.XP_001485068.1	4929.XP_001483478.1	0	0	0	0	0.929	0.893	0	0.547	0.996
PGUG_02624	PGUG_03619	1855657	1855000	4929.XP_001484895.1	4929.XP_001484238.1	0.176	0	0	0	0.929	0.893	0	0.566	0.996
PGUG_02744	PGUG_05785	1855777	1852785	4929.XP_001485015.1	4929.XP_001482023.1	0	0	0	0	0.929	0.893	0	0.604	0.996
PGUG_00363	PGUG_01951	1857748	1857042	4929.XP_001486986.1	4929.XP_001486280.1	0	0	0	0	0.929	0.893	0	0.606	0.996
PGUG_02797	PGUG_05785	1855830	1852785	4929.XP_001485068.1	4929.XP_001482023.1	0	0	0	0	0.929	0.893	0	0.617	0.996
PGUG_00657	PGUG_03638	1858042	1855018	4929.XP_001487280.1	4929.XP_001484256.1	0	0	0	0	0.929	0.893	0	0.606	0.996
PGUG_03990	PGUG_05785	1854023	1852785	4929.XP_001483261.1	4929.XP_001482023.1	0.098	0	0	0	0.929	0.893	0	0.561	0.996
PGUG_01007	PGUG_05105	1858392	1853912	4929.XP_001487630.1	4929.XP_001483150.1	0	0	0	0	0.966	0.893	0	0.100	0.996
PGUG_00657	PGUG_00363	1858042	1857748	4929.XP_001487280.1	4929.XP_001486986.1	0	0	0	0	0.929	0.893	0	0.550	0.996
PGUG_01891	PGUG_02624	1856982	1855657	4929.XP_001486220.1	4929.XP_001484895.1	0.176	0	0	0	0.929	0.893	0	0.447	0.996
PGUG_02658	PGUG_03700	1855691	1855081	4929.XP_001484929.1	4929.XP_001484319.1	0	0	0	0	0.929	0.893	0	0.633	0.996
PGUG_00719	PGUG_02624	1858104	1855657	4929.XP_001487342.1	4929.XP_001484895.1	0	0	0	0	0.929	0.893	0	0.607	0.996
PGUG_00383	PGUG_04408	1857768	1854441	4929.XP_001487006.1	4929.XP_001483679.1	0	0	0	0	0.929	0.893	0	0.635	0.996
PGUG_01877	PGUG_04375	1856967	1854408	4929.XP_001486205.1	4929.XP_001483646.1	0.219	0	0	0	0.929	0.893	0	0.485	0.996
PGUG_03638	PGUG_03619	1855018	1855000	4929.XP_001484256.1	4929.XP_001484238.1	0.098	0	0	0	0.929	0.893	0	0.544	0.996
PGUG_02624	PGUG_02545	1855657	1855578	4929.XP_001484895.1	4929.XP_001484816.1	0.176	0	0	0	0.929	0.893	0	0.456	0.996
PGUG_01465	PGUG_02545	1856556	1855578	4929.XP_001485794.1	4929.XP_001484816.1	0.098	0	0	0	0.929	0.887	0	0.542	0.996
PGUG_01877	PGUG_05785	1856967	1852785	4929.XP_001486205.1	4929.XP_001482023.1	0.176	0	0	0	0.929	0.893	0	0.446	0.996
PGUG_03622	PGUG_05474	1855002	1853216	4929.XP_001484240.1	4929.XP_001482454.1	0	0	0	0	0.970	0.665	0	0.635	0.996
PGUG_01920	PGUG_01426	1857011	1856517	4929.XP_001486249.1	4929.XP_001485755.1	0	0.841	0	0	0.045	0	0.900	0.821	0.996
PGUG_00719	PGUG_02658	1858104	1855691	4929.XP_001487342.1	4929.XP_001484929.1	0	0	0	0	0.929	0.893	0	0.588	0.996
PGUG_02089	PGUG_01877	1857180	1856967	4929.XP_001486418.1	4929.XP_001486205.1	0	0	0	0	0.929	0.893	0	0.626	0.996
PGUG_02545	PGUG_03638	1855578	1855018	4929.XP_001484816.1	4929.XP_001484256.1	0.098	0	0	0	0.929	0.893	0	0.555	0.996
PGUG_02797	PGUG_02624	1855830	1855657	4929.XP_001485068.1	4929.XP_001484895.1	0	0	0	0	0.929	0.893	0	0.606	0.996
PGUG_03638	PGUG_04375	1855018	1854408	4929.XP_001484256.1	4929.XP_001483646.1	0.172	0	0	0	0.929	0.893	0	0.448	0.996
PGUG_01877	PGUG_02798	1856967	1855831	4929.XP_001486205.1	4929.XP_001485069.1	0	0	0	0	0.952	0.893	0	0.452	0.996
PGUG_00719	PGUG_02797	1858104	1855830	4929.XP_001487342.1	4929.XP_001485068.1	0	0	0	0	0.929	0.893	0	0.613	0.996
PGUG_01877	PGUG_05491	1856967	1853233	4929.XP_001486205.1	4929.XP_001482471.1	0.176	0	0	0	0.929	0.893	0	0.566	0.996
PGUG_00438	PGUG_01872	1857823	1856963	4929.XP_001487061.1	4929.XP_001486201.1	0	0	0	0	0.673	0.954	0	0.809	0.996
PGUG_01951	PGUG_04375	1857042	1854408	4929.XP_001486280.1	4929.XP_001483646.1	0	0	0	0	0.929	0.893	0	0.548	0.996
PGUG_00939	PGUG_02305	1858324	1855338	4929.XP_001487562.1	4929.XP_001484576.1	0.098	0	0	0	0.607	0.251	0.900	0.886	0.996
PGUG_01109	PGUG_03389	1858494	1854770	4929.XP_001487732.1	4929.XP_001484008.1	0.050	0	0	0	0.963	0.279	0	0.886	0.996
PGUG_00383	PGUG_00379	1857768	1857765	4929.XP_001487006.1	4929.XP_001487003.1	0.089	0	0	0	0.929	0.893	0	0.594	0.996
PGUG_01171	PGUG_02624	1858556	1855657	4929.XP_001487794.1	4929.XP_001484895.1	0.095	0	0	0	0.929	0.893	0	0.495	0.996
PGUG_02797	PGUG_03638	1855830	1855018	4929.XP_001485068.1	4929.XP_001484256.1	0	0	0	0	0.929	0.893	0	0.607	0.996
PGUG_03990	PGUG_05417	1854023	1853159	4929.XP_001483261.1	4929.XP_001482397.1	0.098	0	0	0	0.929	0.893	0	0.551	0.996
PGUG_03416	PGUG_03982	1854797	1854015	4929.XP_001484035.1	4929.XP_001483253.1	0.176	0	0	0	0.658	0.114	0.900	0.887	0.996
PGUG_01951	PGUG_02624	1857042	1855657	4929.XP_001486280.1	4929.XP_001484895.1	0.176	0	0	0	0.955	0.893	0	0.237	0.996
PGUG_00035	PGUG_05358	1857420	1853100	4929.XP_001486658.1	4929.XP_001482338.1	0.219	0	0	0	0.798	0	0.900	0.811	0.996
PGUG_00657	PGUG_01951	1858042	1857042	4929.XP_001487280.1	4929.XP_001486280.1	0.098	0	0	0	0.955	0.893	0	0.272	0.996
PGUG_02981	PGUG_02918	1856014	1855951	4929.XP_001485252.1	4929.XP_001485189.1	0	0	0.479	0	0.715	0.675	0.800	0.679	0.996
PGUG_00414	PGUG_01430	1857799	1856521	4929.XP_001487037.1	4929.XP_001485759.1	0.047	0.657	0	0	0.741	0.659	0	0.886	0.996
PGUG_00860	PGUG_01613	1858245	1856704	4929.XP_001487483.1	4929.XP_001485942.1	0	0	0	0	0.905	0.732	0	0.890	0.996
PGUG_02545	PGUG_05785	1855578	1852785	4929.XP_001484816.1	4929.XP_001482023.1	0.098	0	0	0	0.929	0.893	0	0.544	0.996
PGUG_00383	PGUG_03700	1857768	1855081	4929.XP_001487006.1	4929.XP_001484319.1	0	0	0	0	0.929	0.893	0	0.606	0.996
PGUG_04408	PGUG_03990	1854441	1854023	4929.XP_001483679.1	4929.XP_001483261.1	0	0	0	0	0.929	0.893	0	0.616	0.996
PGUG_02539	PGUG_04408	1855572	1854441	4929.XP_001484810.1	4929.XP_001483679.1	0	0	0	0	0.929	0.893	0	0.616	0.996
PGUG_00383	PGUG_03619	1857768	1855000	4929.XP_001487006.1	4929.XP_001484238.1	0.098	0	0	0	0.929	0.893	0	0.607	0.996
PGUG_04207	PGUG_05491	1854240	1853233	4929.XP_001483478.1	4929.XP_001482471.1	0	0	0	0	0.929	0.893	0	0.633	0.996
PGUG_01497	PGUG_05030	1856588	1853837	4929.XP_001485826.1	4929.XP_001483075.1	0.219	0	0.476	0	0.212	0.260	0.900	0.875	0.996
PGUG_00719	PGUG_02545	1858104	1855578	4929.XP_001487342.1	4929.XP_001484816.1	0	0	0	0	0.929	0.883	0	0.603	0.996
PGUG_01688	PGUG_03850	1856779	1855231	4929.XP_001486017.1	4929.XP_001484469.1	0.053	0.003	0	0	0.603	0.268	0.900	0.892	0.996
PGUG_02089	PGUG_03619	1857180	1855000	4929.XP_001486418.1	4929.XP_001484238.1	0	0	0	0	0.929	0.893	0	0.602	0.996
PGUG_01171	PGUG_01007	1858556	1858392	4929.XP_001487794.1	4929.XP_001487630.1	0	0	0	0	0.929	0.893	0	0.625	0.996
PGUG_01891	PGUG_02539	1856982	1855572	4929.XP_001486220.1	4929.XP_001484810.1	0.098	0	0	0	0.929	0.893	0	0.607	0.996
PGUG_04207	RPS1	1854240	1853516	4929.XP_001483478.1	4929.XP_001482754.1	0	0	0	0	0.929	0.893	0	0.590	0.996
PGUG_00379	PGUG_02658	1857765	1855691	4929.XP_001487003.1	4929.XP_001484929.1	0.089	0	0	0	0.929	0.893	0	0.612	0.996
PGUG_00719	RPS1	1858104	1853516	4929.XP_001487342.1	4929.XP_001482754.1	0	0	0	0	0.929	0.893	0	0.635	0.996
PGUG_02744	PGUG_04207	1855777	1854240	4929.XP_001485015.1	4929.XP_001483478.1	0	0	0	0	0.929	0.893	0	0.607	0.996
PGUG_02089	PGUG_05785	1857180	1852785	4929.XP_001486418.1	4929.XP_001482023.1	0	0	0	0	0.929	0.893	0	0.614	0.996
PGUG_02797	PGUG_02545	1855830	1855578	4929.XP_001485068.1	4929.XP_001484816.1	0	0	0	0	0.929	0.893	0	0.630	0.996
PGUG_01877	RPS1	1856967	1853516	4929.XP_001486205.1	4929.XP_001482754.1	0	0	0	0	0.929	0.893	0	0.615	0.996
PGUG_02028	PGUG_02658	1857119	1855691	4929.XP_001486357.1	4929.XP_001484929.1	0	0	0	0	0.929	0.893	0	0.558	0.996
PGUG_02798	PGUG_04408	1855831	1854441	4929.XP_001485069.1	4929.XP_001483679.1	0	0	0	0	0.929	0.893	0	0.628	0.996
PGUG_00961	PGUG_04520	1858346	1854553	4929.XP_001487584.1	4929.XP_001483791.1	0	0	0.343	0.722	0.906	0.954	0	0.735	0.996
PGUG_02539	RPS1	1855572	1853516	4929.XP_001484810.1	4929.XP_001482754.1	0	0	0.205	0	0.929	0.893	0	0.432	0.996
PGUG_02658	PGUG_03816	1855691	1855197	4929.XP_001484929.1	4929.XP_001484435.1	0	0	0	0	0.929	0.893	0	0.616	0.996
PGUG_04067	PGUG_05491	1854100	1853233	4929.XP_001483338.1	4929.XP_001482471.1	0.176	0	0	0	0.929	0.893	0	0.446	0.996
PGUG_01171	PGUG_02545	1858556	1855578	4929.XP_001487794.1	4929.XP_001484816.1	0.076	0	0	0	0.929	0.889	0	0.604	0.996
PGUG_02624	PGUG_05785	1855657	1852785	4929.XP_001484895.1	4929.XP_001482023.1	0.176	0	0	0	0.929	0.893	0	0.481	0.996
PGUG_00719	PGUG_01465	1858104	1856556	4929.XP_001487342.1	4929.XP_001485794.1	0	0	0	0	0.929	0.893	0	0.606	0.996
PGUG_02028	PGUG_04207	1857119	1854240	4929.XP_001486357.1	4929.XP_001483478.1	0	0	0	0	0.929	0.893	0	0.551	0.996
PGUG_02089	PGUG_02624	1857180	1855657	4929.XP_001486418.1	4929.XP_001484895.1	0	0	0	0	0.940	0.893	0	0.445	0.996
PGUG_00363	PGUG_02539	1857748	1855572	4929.XP_001486986.1	4929.XP_001484810.1	0	0	0	0	0.966	0.893	0	0.068	0.996
PGUG_02744	PGUG_04408	1855777	1854441	4929.XP_001485015.1	4929.XP_001483679.1	0	0	0	0	0.929	0.893	0	0.606	0.996
PGUG_01951	PGUG_02744	1857042	1855777	4929.XP_001486280.1	4929.XP_001485015.1	0.098	0	0	0	0.929	0.893	0	0.607	0.996
PGUG_01171	PGUG_02251	1858556	1857342	4929.XP_001487794.1	4929.XP_001486580.1	0.054	0	0	0	0.946	0.893	0	0.380	0.996
PGUG_01951	PGUG_05105	1857042	1853912	4929.XP_001486280.1	4929.XP_001483150.1	0.098	0	0	0	0.929	0.893	0	0.593	0.996
PGUG_02089	PGUG_02797	1857180	1855830	4929.XP_001486418.1	4929.XP_001485068.1	0	0	0	0	0.929	0.893	0	0.632	0.996
PGUG_04408	PGUG_05105	1854441	1853912	4929.XP_001483679.1	4929.XP_001483150.1	0	0	0	0	0.929	0.893	0	0.523	0.996
PGUG_01891	PGUG_02658	1856982	1855691	4929.XP_001486220.1	4929.XP_001484929.1	0.098	0	0	0	0.929	0.893	0	0.560	0.996
PGUG_02798	PGUG_02797	1855831	1855830	4929.XP_001485069.1	4929.XP_001485068.1	0	0	0	0	0.929	0.893	0	0.635	0.996
PGUG_00756	PGUG_04538	1858141	1854571	4929.XP_001487379.1	4929.XP_001483809.1	0	0	0	0	0.745	0.893	0	0.891	0.996
PGUG_02251	PGUG_02797	1857342	1855830	4929.XP_001486580.1	4929.XP_001485068.1	0.076	0	0	0	0.929	0.893	0	0.444	0.995
PGUG_02102	PGUG_04428	1857193	1854461	4929.XP_001486431.1	4929.XP_001483699.1	0	0.001	0	0	0.204	0.890	0.800	0.778	0.995
PGUG_01951	PGUG_04476	1857042	1854509	4929.XP_001486280.1	4929.XP_001483747.1	0	0	0	0	0.958	0.893	0	0.100	0.995
PGUG_00657	PGUG_02089	1858042	1857180	4929.XP_001487280.1	4929.XP_001486418.1	0	0	0	0	0.905	0.893	0	0.607	0.995
PGUG_01405	PGUG_04596	1856496	1854629	4929.XP_001485734.1	4929.XP_001483867.1	0.176	0.136	0	0	0.684	0.423	0.900	0.700	0.995
PGUG_02251	PGUG_04207	1857342	1854240	4929.XP_001486580.1	4929.XP_001483478.1	0	0	0	0	0.929	0.893	0	0.457	0.995
PGUG_01375	PGUG_03068	1856466	1856101	4929.XP_001485704.1	4929.XP_001485339.1	0.076	0.382	0	0	0.353	0.090	0.900	0.892	0.995
PGUG_00657	PGUG_00379	1858042	1857765	4929.XP_001487280.1	4929.XP_001487003.1	0.089	0	0	0	0.929	0.893	0	0.452	0.995
PGUG_03619	PGUG_04207	1855000	1854240	4929.XP_001484238.1	4929.XP_001483478.1	0	0	0.360	0	0.929	0.893	0	0.212	0.995
PGUG_02658	PGUG_04476	1855691	1854509	4929.XP_001484929.1	4929.XP_001483747.1	0	0	0	0	0.929	0.893	0	0.433	0.995
PGUG_00816	PGUG_00420	1858201	1857805	4929.XP_001487439.1	4929.XP_001487043.1	0	0	0	0	0.209	0.954	0	0.892	0.995
PGUG_03816	PGUG_03990	1855197	1854023	4929.XP_001484435.1	4929.XP_001483261.1	0	0	0	0	0.929	0.893	0	0.456	0.995
PGUG_04408	RPS1	1854441	1853516	4929.XP_001483679.1	4929.XP_001482754.1	0	0	0	0	0.938	0.893	0	0.331	0.995
PGUG_01891	RPS0	1856982	1855403	4929.XP_001486220.1	4929.XP_001484641.1	0.085	0	0	0	0.929	0.893	0	0.454	0.995
PGUG_02089	PGUG_02658	1857180	1855691	4929.XP_001486418.1	4929.XP_001484929.1	0	0	0	0	0.929	0.893	0	0.463	0.995
PGUG_03816	RPS1	1855197	1853516	4929.XP_001484435.1	4929.XP_001482754.1	0.150	0	0	0	0.929	0.893	0	0.350	0.995
PGUG_00657	PGUG_04207	1858042	1854240	4929.XP_001487280.1	4929.XP_001483478.1	0.175	0	0	0	0.929	0.893	0	0.333	0.995
PGUG_01171	PGUG_00657	1858556	1858042	4929.XP_001487794.1	4929.XP_001487280.1	0.076	0	0	0	0.929	0.893	0	0.446	0.995
PGUG_00383	PGUG_02658	1857768	1855691	4929.XP_001487006.1	4929.XP_001484929.1	0.098	0	0	0	0.929	0.893	0	0.456	0.995
PGUG_00383	PGUG_02539	1857768	1855572	4929.XP_001487006.1	4929.XP_001484810.1	0.098	0	0	0	0.929	0.893	0	0.456	0.995
PGUG_01171	PGUG_04207	1858556	1854240	4929.XP_001487794.1	4929.XP_001483478.1	0	0	0	0	0.929	0.893	0	0.444	0.995
PGUG_02545	PGUG_05417	1855578	1853159	4929.XP_001484816.1	4929.XP_001482397.1	0.098	0	0	0	0.929	0.893	0	0.455	0.995
PGUG_02744	PGUG_03700	1855777	1855081	4929.XP_001485015.1	4929.XP_001484319.1	0	0	0	0	0.929	0.893	0	0.512	0.995
PGUG_02624	PGUG_03990	1855657	1854023	4929.XP_001484895.1	4929.XP_001483261.1	0.176	0	0	0	0.929	0.893	0	0.317	0.995
PGUG_03816	PGUG_03700	1855197	1855081	4929.XP_001484435.1	4929.XP_001484319.1	0	0	0	0	0.929	0.893	0	0.457	0.995
PGUG_02089	PGUG_03638	1857180	1855018	4929.XP_001486418.1	4929.XP_001484256.1	0	0	0	0	0.929	0.893	0	0.444	0.995
PGUG_02744	PGUG_04739	1855777	1853546	4929.XP_001485015.1	4929.XP_001482784.1	0	0	0	0	0.929	0.893	0	0.453	0.995
PGUG_00307	PGUG_02579	1857692	1855612	4929.XP_001486930.1	4929.XP_001484850.1	0.162	0	0	0	0.732	0.269	0.900	0.784	0.995
PGUG_04739	RPS1	1853546	1853516	4929.XP_001482784.1	4929.XP_001482754.1	0	0	0	0	0.929	0.893	0	0.459	0.995
PGUG_01489	PGUG_04243	1856580	1854276	4929.XP_001485818.1	4929.XP_001483514.1	0.162	0	0	0	0.252	0.411	0.900	0.891	0.995
PGUG_01465	PGUG_03619	1856556	1855000	4929.XP_001485794.1	4929.XP_001484238.1	0.098	0	0	0	0.954	0.889	0	0.165	0.995
PGUG_01465	PGUG_05105	1856556	1853912	4929.XP_001485794.1	4929.XP_001483150.1	0.098	0	0	0	0.929	0.893	0	0.438	0.995
PGUG_04041	PGUG_04001	1854074	1854034	4929.XP_001483312.1	4929.XP_001483272.1	0.176	0	0.277	0	0.715	0.516	0.900	0.548	0.995
PGUG_01465	PGUG_05491	1856556	1853233	4929.XP_001485794.1	4929.XP_001482471.1	0.098	0	0.272	0	0.929	0.893	0	0.215	0.995
PGUG_04207	PGUG_04739	1854240	1853546	4929.XP_001483478.1	4929.XP_001482784.1	0	0	0	0	0.929	0.893	0	0.451	0.995
PGUG_03638	PGUG_04408	1855018	1854441	4929.XP_001484256.1	4929.XP_001483679.1	0	0	0	0	0.929	0.893	0	0.466	0.995
PGUG_01891	PGUG_02545	1856982	1855578	4929.XP_001486220.1	4929.XP_001484816.1	0.098	0	0	0	0.929	0.893	0	0.452	0.995
PGUG_01951	PGUG_02658	1857042	1855691	4929.XP_001486280.1	4929.XP_001484929.1	0.098	0	0	0	0.929	0.893	0	0.447	0.995
PGUG_01171	PGUG_05105	1858556	1853912	4929.XP_001487794.1	4929.XP_001483150.1	0.076	0	0.229	0	0.929	0.893	0	0.336	0.995
PGUG_02089	PGUG_04739	1857180	1853546	4929.XP_001486418.1	4929.XP_001482784.1	0	0	0	0	0.929	0.893	0	0.443	0.995
PGUG_01951	PGUG_01465	1857042	1856556	4929.XP_001486280.1	4929.XP_001485794.1	0.098	0	0	0	0.944	0.893	0	0.218	0.995
PGUG_00383	PGUG_03990	1857768	1854023	4929.XP_001487006.1	4929.XP_001483261.1	0.098	0	0	0	0.929	0.893	0	0.460	0.995
PGUG_04375	PGUG_04739	1854408	1853546	4929.XP_001483646.1	4929.XP_001482784.1	0	0	0	0	0.929	0.893	0	0.447	0.995
PGUG_01171	PGUG_05491	1858556	1853233	4929.XP_001487794.1	4929.XP_001482471.1	0.076	0	0	0	0.929	0.893	0	0.459	0.995
PGUG_00719	PGUG_05105	1858104	1853912	4929.XP_001487342.1	4929.XP_001483150.1	0	0	0	0	0.929	0.893	0	0.446	0.995
PGUG_03700	PGUG_05417	1855081	1853159	4929.XP_001484319.1	4929.XP_001482397.1	0	0	0	0	0.929	0.893	0	0.458	0.995
PGUG_04375	PGUG_05417	1854408	1853159	4929.XP_001483646.1	4929.XP_001482397.1	0	0	0	0	0.929	0.893	0	0.466	0.995
PGUG_02251	PGUG_02089	1857342	1857180	4929.XP_001486580.1	4929.XP_001486418.1	0	0	0	0	0.963	0.893	0	0	0.995
PGUG_00379	EFT2	1857765	1855945	4929.XP_001487003.1	4929.XP_001485183.1	0.060	0	0	0	0.929	0.767	0	0.746	0.995
PGUG_02089	PGUG_05417	1857180	1853159	4929.XP_001486418.1	4929.XP_001482397.1	0	0	0	0	0.929	0.893	0	0.493	0.995
PGUG_00379	PGUG_03619	1857765	1855000	4929.XP_001487003.1	4929.XP_001484238.1	0.064	0	0	0	0.929	0.884	0	0.458	0.995
PGUG_04239	PGUG_05365	1854272	1853107	4929.XP_001483510.1	4929.XP_001482345.1	0	0.183	0.317	0	0.626	0	0.900	0.805	0.995
PGUG_03638	PGUG_04739	1855018	1853546	4929.XP_001484256.1	4929.XP_001482784.1	0	0	0	0	0.929	0.891	0	0.467	0.995
PGUG_04408	PGUG_05785	1854441	1852785	4929.XP_001483679.1	4929.XP_001482023.1	0	0	0	0	0.926	0.893	0	0.421	0.995
PGUG_02744	PGUG_05417	1855777	1853159	4929.XP_001485015.1	4929.XP_001482397.1	0.095	0	0	0	0.929	0.893	0	0.447	0.995
PGUG_01321	PGUG_03698	1856412	1855080	4929.XP_001485650.1	4929.XP_001484318.1	0	0	0	0	0.176	0.767	0.800	0.892	0.995
PGUG_02624	RPS1	1855657	1853516	4929.XP_001484895.1	4929.XP_001482754.1	0	0	0	0	0.929	0.893	0	0.444	0.995
PGUG_02744	PGUG_03990	1855777	1854023	4929.XP_001485015.1	4929.XP_001483261.1	0.098	0	0	0	0.929	0.893	0	0.445	0.995
PGUG_03619	PGUG_05491	1855000	1853233	4929.XP_001484238.1	4929.XP_001482471.1	0.098	0	0	0	0.929	0.893	0	0.457	0.995
PGUG_02251	RPS0	1857342	1855403	4929.XP_001486580.1	4929.XP_001484641.1	0.076	0	0	0	0.929	0.893	0	0.497	0.995
PGUG_02744	PGUG_05105	1855777	1853912	4929.XP_001485015.1	4929.XP_001483150.1	0.098	0	0	0	0.929	0.893	0	0.382	0.995
PGUG_01007	PGUG_04739	1858392	1853546	4929.XP_001487630.1	4929.XP_001482784.1	0	0	0	0	0.929	0.893	0	0.411	0.995
PGUG_00719	PGUG_03619	1858104	1855000	4929.XP_001487342.1	4929.XP_001484238.1	0	0	0	0	0.929	0.893	0	0.446	0.995
PGUG_02797	PGUG_04739	1855830	1853546	4929.XP_001485068.1	4929.XP_001482784.1	0	0	0	0	0.929	0.893	0	0.447	0.995
PGUG_01951	PGUG_03816	1857042	1855197	4929.XP_001486280.1	4929.XP_001484435.1	0	0	0	0	0.929	0.893	0	0.456	0.995
PGUG_02028	PGUG_05105	1857119	1853912	4929.XP_001486357.1	4929.XP_001483150.1	0	0	0	0	0.929	0.893	0	0.446	0.995
PGUG_00562	PGUG_03698	1857947	1855080	4929.XP_001487185.1	4929.XP_001484318.1	0	0	0	0	0.225	0.754	0.800	0.887	0.995
PGUG_01327	PGUG_02732	1856418	1855765	4929.XP_001485656.1	4929.XP_001485003.1	0	0	0	0	0.746	0.880	0	0.866	0.995
PGUG_02797	PGUG_02539	1855830	1855572	4929.XP_001485068.1	4929.XP_001484810.1	0	0	0	0	0.929	0.893	0	0.478	0.995
PGUG_00719	PGUG_01877	1858104	1856967	4929.XP_001487342.1	4929.XP_001486205.1	0	0	0	0	0.929	0.893	0	0.449	0.995
PGUG_00719	PGUG_04476	1858104	1854509	4929.XP_001487342.1	4929.XP_001483747.1	0	0	0	0	0.929	0.893	0	0.450	0.995
PGUG_01405	PGUG_01317	1856496	1856408	4929.XP_001485734.1	4929.XP_001485646.1	0.176	0.141	0	0	0.684	0.423	0.900	0.700	0.995
PGUG_02797	PGUG_04375	1855830	1854408	4929.XP_001485068.1	4929.XP_001483646.1	0	0	0	0	0.929	0.893	0	0.454	0.995
PGUG_01171	PGUG_02797	1858556	1855830	4929.XP_001487794.1	4929.XP_001485068.1	0	0	0	0	0.929	0.893	0	0.448	0.995
PGUG_00379	PGUG_04408	1857765	1854441	4929.XP_001487003.1	4929.XP_001483679.1	0	0	0	0	0.929	0.893	0	0.422	0.995
PGUG_00383	PGUG_02798	1857768	1855831	4929.XP_001487006.1	4929.XP_001485069.1	0	0	0	0	0.929	0.893	0	0.463	0.995
PGUG_02028	PGUG_04408	1857119	1854441	4929.XP_001486357.1	4929.XP_001483679.1	0	0	0	0	0.929	0.893	0	0.459	0.995
PGUG_02744	PGUG_03816	1855777	1855197	4929.XP_001485015.1	4929.XP_001484435.1	0	0	0	0	0.929	0.893	0	0.474	0.995
PGUG_00363	RPS0	1857748	1855403	4929.XP_001486986.1	4929.XP_001484641.1	0	0	0	0	0.929	0.893	0	0.438	0.995
PGUG_00719	PGUG_05491	1858104	1853233	4929.XP_001487342.1	4929.XP_001482471.1	0	0	0	0	0.929	0.893	0	0.457	0.995
PGUG_02028	PGUG_04067	1857119	1854100	4929.XP_001486357.1	4929.XP_001483338.1	0	0	0	0	0.929	0.893	0	0.420	0.995
PGUG_00816	PGUG_01723	1858201	1856814	4929.XP_001487439.1	4929.XP_001486052.1	0	0	0	0	0.643	0.954	0	0.771	0.995
PGUG_01147	PGUG_04278	1858532	1854311	4929.XP_001487770.1	4929.XP_001483549.1	0.095	0.160	0.318	0	0.619	0.268	0.900	0.779	0.995
PGUG_00379	PGUG_03638	1857765	1855018	4929.XP_001487003.1	4929.XP_001484256.1	0	0	0	0	0.929	0.893	0	0.453	0.995
PGUG_02624	PGUG_05105	1855657	1853912	4929.XP_001484895.1	4929.XP_001483150.1	0.176	0	0	0	0.929	0.893	0	0.313	0.995
PGUG_01723	PGUG_01621	1856814	1856712	4929.XP_001486052.1	4929.XP_001485950.1	0	0	0	0	0.551	0.954	0	0.779	0.995
PGUG_00307	PGUG_00102	1857692	1857487	4929.XP_001486930.1	4929.XP_001486725.1	0.098	0	0	0	0.544	0.263	0.900	0.888	0.995
PGUG_00379	PGUG_02028	1857765	1857119	4929.XP_001487003.1	4929.XP_001486357.1	0	0	0	0	0.929	0.893	0	0.459	0.995
PGUG_00379	PGUG_03700	1857765	1855081	4929.XP_001487003.1	4929.XP_001484319.1	0	0	0	0	0.925	0.893	0	0.448	0.995
PGUG_04476	PGUG_05785	1854509	1852785	4929.XP_001483747.1	4929.XP_001482023.1	0	0	0	0	0.929	0.893	0	0.486	0.995
PGUG_03619	PGUG_05785	1855000	1852785	4929.XP_001484238.1	4929.XP_001482023.1	0.096	0	0	0	0.929	0.893	0	0.454	0.995
PGUG_00979	PGUG_00961	1858364	1858346	4929.XP_001487602.1	4929.XP_001487584.1	0	0	0.228	0	0.841	0.880	0	0.731	0.995
PGUG_01171	PGUG_01891	1858556	1856982	4929.XP_001487794.1	4929.XP_001486220.1	0.076	0	0	0	0.929	0.887	0	0.449	0.995
PGUG_02624	RPS0	1855657	1855403	4929.XP_001484895.1	4929.XP_001484641.1	0.166	0	0	0	0.929	0.893	0	0.374	0.995
PGUG_01465	PGUG_05785	1856556	1852785	4929.XP_001485794.1	4929.XP_001482023.1	0.098	0	0	0	0.929	0.893	0	0.405	0.995
PGUG_02744	RPS1	1855777	1853516	4929.XP_001485015.1	4929.XP_001482754.1	0	0	0	0	0.929	0.893	0	0.454	0.995
PGUG_02797	PGUG_02744	1855830	1855777	4929.XP_001485068.1	4929.XP_001485015.1	0	0	0	0	0.929	0.893	0	0.452	0.995
PGUG_00383	PGUG_01951	1857768	1857042	4929.XP_001487006.1	4929.XP_001486280.1	0.098	0	0	0	0.950	0.893	0	0.215	0.995
PGUG_01007	PGUG_02089	1858392	1857180	4929.XP_001487630.1	4929.XP_001486418.1	0	0	0	0	0.929	0.893	0	0.474	0.995
PGUG_02798	PGUG_03638	1855831	1855018	4929.XP_001485069.1	4929.XP_001484256.1	0	0	0	0	0.929	0.893	0	0.453	0.995
PGUG_00363	RPS1	1857748	1853516	4929.XP_001486986.1	4929.XP_001482754.1	0	0	0	0	0.929	0.893	0	0.456	0.995
PGUG_01007	PGUG_02798	1858392	1855831	4929.XP_001487630.1	4929.XP_001485069.1	0	0	0	0	0.929	0.893	0	0.447	0.995
PGUG_01465	PGUG_05417	1856556	1853159	4929.XP_001485794.1	4929.XP_001482397.1	0.098	0	0	0	0.953	0.893	0	0.215	0.995
PGUG_01891	PGUG_03638	1856982	1855018	4929.XP_001486220.1	4929.XP_001484256.1	0.098	0	0	0	0.929	0.893	0	0.428	0.995
PGUG_00106	PGUG_04430	1857491	1854463	4929.XP_001486729.1	4929.XP_001483701.1	0	0.001	0	0	0.628	0.893	0	0.890	0.995
PGUG_01891	PGUG_05785	1856982	1852785	4929.XP_001486220.1	4929.XP_001482023.1	0.098	0	0	0	0.929	0.893	0	0.475	0.995
PGUG_01171	PGUG_02744	1858556	1855777	4929.XP_001487794.1	4929.XP_001485015.1	0.076	0	0	0	0.929	0.893	0	0.454	0.995
PGUG_02797	RPS1	1855830	1853516	4929.XP_001485068.1	4929.XP_001482754.1	0	0	0	0	0.929	0.893	0	0.335	0.994
PGUG_02624	PGUG_04408	1855657	1854441	4929.XP_001484895.1	4929.XP_001483679.1	0	0	0	0	0.929	0.893	0	0.372	0.994
PGUG_00383	PGUG_02624	1857768	1855657	4929.XP_001487006.1	4929.XP_001484895.1	0.176	0	0	0	0.929	0.893	0	0.237	0.994
PGUG_03596	PGUG_04520	1854977	1854553	4929.XP_001484215.1	4929.XP_001483791.1	0	0	0	0	0.878	0.891	0	0.630	0.994
PGUG_03816	PGUG_05785	1855197	1852785	4929.XP_001484435.1	4929.XP_001482023.1	0	0	0	0	0.929	0.893	0	0.361	0.994
RPS0	PGUG_03990	1855403	1854023	4929.XP_001484641.1	4929.XP_001483261.1	0.091	0	0	0	0.929	0.893	0	0.318	0.994
EFT2	PGUG_04067	1855945	1854100	4929.XP_001485183.1	4929.XP_001483338.1	0.089	0	0	0	0.929	0.880	0	0.368	0.994
PGUG_03700	PGUG_04375	1855081	1854408	4929.XP_001484319.1	4929.XP_001483646.1	0	0	0	0	0.929	0.893	0	0.327	0.994
PGUG_01171	PGUG_03700	1858556	1855081	4929.XP_001487794.1	4929.XP_001484319.1	0	0	0	0	0.929	0.893	0	0.305	0.994
PGUG_00436	PGUG_03627	1857821	1855008	4929.XP_001487059.1	4929.XP_001484246.1	0	0	0.436	0.728	0.929	0.889	0	0.892	0.994
PGUG_00379	PGUG_04739	1857765	1853546	4929.XP_001487003.1	4929.XP_001482784.1	0	0	0	0	0.929	0.893	0	0.372	0.994
PGUG_01951	PGUG_02545	1857042	1855578	4929.XP_001486280.1	4929.XP_001484816.1	0.098	0	0	0	0.929	0.887	0	0.288	0.994
PGUG_01465	PGUG_02658	1856556	1855691	4929.XP_001485794.1	4929.XP_001484929.1	0.098	0	0	0	0.929	0.893	0	0.310	0.994
PGUG_02028	PGUG_02797	1857119	1855830	4929.XP_001486357.1	4929.XP_001485068.1	0	0	0	0	0.929	0.893	0	0.287	0.994
PGUG_00550	PGUG_05333	1857935	1853075	4929.XP_001487173.1	4929.XP_001482313.1	0.210	0	0	0	0.745	0.148	0.900	0.747	0.994
PGUG_01171	PGUG_00383	1858556	1857768	4929.XP_001487794.1	4929.XP_001487006.1	0.076	0	0	0	0.929	0.893	0	0.322	0.994
PGUG_00102	PGUG_02910	1857487	1855943	4929.XP_001486725.1	4929.XP_001485181.1	0.058	0	0	0	0.737	0.138	0.900	0.783	0.994
PGUG_01951	PGUG_04739	1857042	1853546	4929.XP_001486280.1	4929.XP_001482784.1	0	0	0	0	0.933	0.893	0	0.320	0.994
PGUG_00719	PGUG_02028	1858104	1857119	4929.XP_001487342.1	4929.XP_001486357.1	0	0	0	0	0.929	0.893	0	0.324	0.994
PGUG_02101	PGUG_03301	1857192	1854682	4929.XP_001486430.1	4929.XP_001483920.1	0.219	0	0	0	0.660	0.142	0.900	0.783	0.994
RPS0	PGUG_03816	1855403	1855197	4929.XP_001484641.1	4929.XP_001484435.1	0	0	0	0	0.929	0.893	0	0.385	0.994
RPS0	PGUG_04375	1855403	1854408	4929.XP_001484641.1	4929.XP_001483646.1	0	0	0	0	0.929	0.893	0	0.333	0.994
PGUG_03700	PGUG_05105	1855081	1853912	4929.XP_001484319.1	4929.XP_001483150.1	0	0	0	0	0.929	0.893	0	0.328	0.994
PGUG_01877	PGUG_02744	1856967	1855777	4929.XP_001486205.1	4929.XP_001485015.1	0.176	0	0	0	0.929	0.893	0	0.218	0.994
PGUG_01951	PGUG_03638	1857042	1855018	4929.XP_001486280.1	4929.XP_001484256.1	0.098	0	0	0	0.929	0.889	0	0.352	0.994
PGUG_00779	PGUG_00435	1858164	1857820	4929.XP_001487402.1	4929.XP_001487058.1	0	0	0	0.850	0.737	0.893	0.800	0.892	0.994
PGUG_03619	PGUG_04067	1855000	1854100	4929.XP_001484238.1	4929.XP_001483338.1	0.176	0	0	0	0.929	0.893	0	0.279	0.994
PGUG_02028	PGUG_01465	1857119	1856556	4929.XP_001486357.1	4929.XP_001485794.1	0	0	0	0	0.951	0.893	0	0.113	0.994
RPS0	PGUG_05105	1855403	1853912	4929.XP_001484641.1	4929.XP_001483150.1	0.093	0	0.229	0	0.929	0.893	0	0.165	0.994
PGUG_00657	PGUG_02744	1858042	1855777	4929.XP_001487280.1	4929.XP_001485015.1	0	0	0	0	0.929	0.893	0	0.327	0.994
PGUG_00657	PGUG_03619	1858042	1855000	4929.XP_001487280.1	4929.XP_001484238.1	0.096	0	0	0	0.929	0.893	0	0.233	0.994
PGUG_02101	PGUG_03057	1857192	1856090	4929.XP_001486430.1	4929.XP_001485328.1	0.218	0	0	0	0.757	0	0.900	0.761	0.994
PGUG_03772	PGUG_04088	1855153	1854121	4929.XP_001484391.1	4929.XP_001483359.1	0	0	0	0	0.956	0.808	0	0.448	0.994
RPS1	PGUG_05785	1853516	1852785	4929.XP_001482754.1	4929.XP_001482023.1	0	0	0	0	0.929	0.893	0	0.373	0.994
PGUG_01891	PGUG_04207	1856982	1854240	4929.XP_001486220.1	4929.XP_001483478.1	0	0	0	0	0.929	0.893	0	0.371	0.994
PGUG_00436	PGUG_04399	1857821	1854432	4929.XP_001487059.1	4929.XP_001483670.1	0	0	0.423	0.733	0.929	0.893	0	0.820	0.994
PGUG_02658	PGUG_03990	1855691	1854023	4929.XP_001484929.1	4929.XP_001483261.1	0.098	0	0	0	0.929	0.893	0	0.316	0.994
PGUG_01171	RPS0	1858556	1855403	4929.XP_001487794.1	4929.XP_001484641.1	0.065	0	0.258	0	0.929	0.893	0	0.112	0.994
PGUG_01171	PGUG_02798	1858556	1855831	4929.XP_001487794.1	4929.XP_001485069.1	0	0	0	0	0.929	0.893	0	0.325	0.994
PGUG_02798	PGUG_02624	1855831	1855657	4929.XP_001485069.1	4929.XP_001484895.1	0	0	0	0	0.951	0.893	0	0.103	0.994
PGUG_04476	PGUG_04207	1854509	1854240	4929.XP_001483747.1	4929.XP_001483478.1	0	0	0	0	0.918	0.893	0	0.446	0.994
PGUG_00379	PGUG_04207	1857765	1854240	4929.XP_001487003.1	4929.XP_001483478.1	0.157	0	0	0	0.929	0.893	0	0.189	0.994
PGUG_00657	PGUG_02251	1858042	1857342	4929.XP_001487280.1	4929.XP_001486580.1	0.053	0	0	0	0.929	0.893	0	0.387	0.994
PGUG_00657	RPS0	1858042	1855403	4929.XP_001487280.1	4929.XP_001484641.1	0	0	0	0	0.914	0.893	0	0.446	0.994
PGUG_00657	PGUG_02545	1858042	1855578	4929.XP_001487280.1	4929.XP_001484816.1	0.098	0	0	0	0.929	0.890	0	0.334	0.994
PGUG_02251	PGUG_02028	1857342	1857119	4929.XP_001486580.1	4929.XP_001486357.1	0	0	0	0	0.929	0.893	0	0.377	0.994
PGUG_02545	RPS0	1855578	1855403	4929.XP_001484816.1	4929.XP_001484641.1	0.098	0	0	0	0.929	0.887	0	0.373	0.994
PGUG_04476	PGUG_05105	1854509	1853912	4929.XP_001483747.1	4929.XP_001483150.1	0	0	0	0	0.929	0.893	0	0.314	0.994
EFT2	PGUG_02539	1855945	1855572	4929.XP_001485183.1	4929.XP_001484810.1	0.065	0	0	0	0.929	0.825	0	0.611	0.994
PGUG_02744	PGUG_02545	1855777	1855578	4929.XP_001485015.1	4929.XP_001484816.1	0.098	0	0	0	0.929	0.893	0	0.242	0.994
PGUG_02089	RPS0	1857180	1855403	4929.XP_001486418.1	4929.XP_001484641.1	0	0	0	0	0.929	0.893	0	0.305	0.994
PGUG_03619	RPS1	1855000	1853516	4929.XP_001484238.1	4929.XP_001482754.1	0	0	0	0	0.929	0.893	0	0.277	0.994
PGUG_00363	PGUG_02251	1857748	1857342	4929.XP_001486986.1	4929.XP_001486580.1	0	0	0	0	0.929	0.893	0	0.320	0.994
PGUG_02797	PGUG_04408	1855830	1854441	4929.XP_001485068.1	4929.XP_001483679.1	0	0	0	0	0.929	0.893	0	0.379	0.994
PGUG_02658	PGUG_04207	1855691	1854240	4929.XP_001484929.1	4929.XP_001483478.1	0	0	0	0	0.929	0.893	0	0.293	0.994
PGUG_02797	PGUG_05417	1855830	1853159	4929.XP_001485068.1	4929.XP_001482397.1	0	0	0	0	0.929	0.893	0	0.333	0.994
PGUG_02624	PGUG_05491	1855657	1853233	4929.XP_001484895.1	4929.XP_001482471.1	0.176	0	0	0	0.929	0.893	0	0.237	0.994
PGUG_00657	PGUG_05491	1858042	1853233	4929.XP_001487280.1	4929.XP_001482471.1	0.098	0	0	0	0.929	0.893	0	0.333	0.994
PGUG_00144	PGUG_02397	1857529	1855430	4929.XP_001486767.1	4929.XP_001484668.1	0	0	0	0	0.737	0.808	0	0.892	0.994
PGUG_01171	PGUG_03816	1858556	1855197	4929.XP_001487794.1	4929.XP_001484435.1	0	0	0.234	0	0.929	0.893	0	0.146	0.994
PGUG_01390	PGUG_04204	1856481	1854237	4929.XP_001485719.1	4929.XP_001483475.1	0.219	0	0	0	0.632	0	0.900	0.821	0.994
PGUG_00383	PGUG_01891	1857768	1856982	4929.XP_001487006.1	4929.XP_001486220.1	0.098	0	0	0	0.929	0.893	0	0.317	0.994
PGUG_00379	PGUG_03816	1857765	1855197	4929.XP_001487003.1	4929.XP_001484435.1	0	0	0.216	0	0.929	0.893	0	0.120	0.994
PGUG_01007	PGUG_02744	1858392	1855777	4929.XP_001487630.1	4929.XP_001485015.1	0	0	0	0	0.929	0.893	0	0.308	0.994
EFT2	RPS0	1855945	1855403	4929.XP_001485183.1	4929.XP_001484641.1	0.059	0	0	0	0.929	0.816	0	0.606	0.994
PGUG_01497	PGUG_05560	1856588	1853302	4929.XP_001485826.1	4929.XP_001482540.1	0.219	0	0	0	0.248	0.260	0.900	0.892	0.994
PGUG_04476	PGUG_04375	1854509	1854408	4929.XP_001483747.1	4929.XP_001483646.1	0	0	0	0	0.929	0.893	0	0.302	0.994
PGUG_01465	PGUG_02539	1856556	1855572	4929.XP_001485794.1	4929.XP_001484810.1	0.098	0	0.280	0	0.929	0.889	0	0.165	0.994
PGUG_00379	PGUG_04375	1857765	1854408	4929.XP_001487003.1	4929.XP_001483646.1	0	0	0	0	0.929	0.893	0	0.324	0.994
PGUG_05491	PGUG_05785	1853233	1852785	4929.XP_001482471.1	4929.XP_001482023.1	0.098	0	0	0	0.929	0.893	0	0.312	0.994
PGUG_01891	PGUG_03816	1856982	1855197	4929.XP_001486220.1	4929.XP_001484435.1	0	0	0	0	0.929	0.893	0	0.333	0.994
PGUG_01951	PGUG_03990	1857042	1854023	4929.XP_001486280.1	4929.XP_001483261.1	0.098	0	0	0	0.929	0.893	0	0.330	0.994
PGUG_00363	PGUG_04408	1857748	1854441	4929.XP_001486986.1	4929.XP_001483679.1	0	0	0	0	0.929	0.893	0	0.305	0.994
PGUG_02744	PGUG_02539	1855777	1855572	4929.XP_001485015.1	4929.XP_001484810.1	0.098	0	0	0	0.929	0.893	0	0.145	0.993
PGUG_00939	PGUG_00752	1858324	1858137	4929.XP_001487562.1	4929.XP_001487375.1	0.053	0	0	0	0.056	0.455	0.900	0.889	0.993
PGUG_01465	PGUG_03990	1856556	1854023	4929.XP_001485794.1	4929.XP_001483261.1	0.098	0	0	0	0.929	0.893	0	0.170	0.993
PGUG_02251	PGUG_04067	1857342	1854100	4929.XP_001486580.1	4929.XP_001483338.1	0.062	0	0	0	0.930	0.893	0	0.137	0.993
PGUG_00657	PGUG_02028	1858042	1857119	4929.XP_001487280.1	4929.XP_001486357.1	0	0	0	0	0.929	0.893	0	0.200	0.993
PGUG_03619	PGUG_04375	1855000	1854408	4929.XP_001484238.1	4929.XP_001483646.1	0	0	0	0	0.929	0.893	0	0.254	0.993
PGUG_01171	PGUG_04408	1858556	1854441	4929.XP_001487794.1	4929.XP_001483679.1	0	0	0	0	0.929	0.893	0	0.170	0.993
PGUG_02744	PGUG_02624	1855777	1855657	4929.XP_001485015.1	4929.XP_001484895.1	0.176	0	0	0	0.929	0.893	0	0.129	0.993
PGUG_00363	PGUG_04739	1857748	1853546	4929.XP_001486986.1	4929.XP_001482784.1	0	0	0	0	0.929	0.893	0	0.215	0.993
PGUG_02798	PGUG_04739	1855831	1853546	4929.XP_001485069.1	4929.XP_001482784.1	0	0	0	0	0.929	0.893	0	0.214	0.993
PGUG_02545	PGUG_05105	1855578	1853912	4929.XP_001484816.1	4929.XP_001483150.1	0.098	0	0	0	0.929	0.893	0	0.165	0.993
PGUG_00379	PGUG_04476	1857765	1854509	4929.XP_001487003.1	4929.XP_001483747.1	0	0	0	0	0.929	0.893	0	0.176	0.993
PGUG_01325	PGUG_02309	1856416	1855342	4929.XP_001485654.1	4929.XP_001484580.1	0.162	0	0.344	0	0.603	0.058	0.900	0.747	0.993
PGUG_00363	PGUG_02545	1857748	1855578	4929.XP_001486986.1	4929.XP_001484816.1	0	0	0	0	0.940	0.890	0	0.100	0.993
PGUG_01891	PGUG_03619	1856982	1855000	4929.XP_001486220.1	4929.XP_001484238.1	0.098	0	0	0	0.929	0.893	0	0.165	0.993
PGUG_01891	PGUG_04739	1856982	1853546	4929.XP_001486220.1	4929.XP_001482784.1	0	0	0	0	0.929	0.893	0	0.221	0.993
PGUG_00383	PGUG_01465	1857768	1856556	4929.XP_001487006.1	4929.XP_001485794.1	0.098	0	0	0	0.929	0.893	0	0.203	0.993
PGUG_04739	PGUG_05417	1853546	1853159	4929.XP_001482784.1	4929.XP_001482397.1	0	0	0	0	0.929	0.893	0	0.242	0.993
PGUG_00657	PGUG_00383	1858042	1857768	4929.XP_001487280.1	4929.XP_001487006.1	0.098	0	0	0	0.929	0.893	0	0.186	0.993
PGUG_00436	PGUG_04349	1857821	1854382	4929.XP_001487059.1	4929.XP_001483620.1	0	0	0.384	0.745	0.929	0.868	0	0.881	0.993
PGUG_01171	PGUG_03638	1858556	1855018	4929.XP_001487794.1	4929.XP_001484256.1	0.076	0	0	0	0.929	0.885	0	0.214	0.993
PGUG_03619	PGUG_05417	1855000	1853159	4929.XP_001484238.1	4929.XP_001482397.1	0.098	0	0	0	0.929	0.893	0	0.165	0.993
PGUG_02028	PGUG_01891	1857119	1856982	4929.XP_001486357.1	4929.XP_001486220.1	0	0	0	0	0.929	0.893	0	0.254	0.993
PGUG_01007	PGUG_04476	1858392	1854509	4929.XP_001487630.1	4929.XP_001483747.1	0	0	0.206	0	0.929	0.893	0	0.094	0.993
PGUG_03990	PGUG_04739	1854023	1853546	4929.XP_001483261.1	4929.XP_001482784.1	0	0	0	0	0.929	0.893	0	0.216	0.993
PGUG_03816	PGUG_05105	1855197	1853912	4929.XP_001484435.1	4929.XP_001483150.1	0	0	0.205	0	0.929	0.893	0	0	0.993
PGUG_00383	RPS1	1857768	1853516	4929.XP_001487006.1	4929.XP_001482754.1	0	0	0	0	0.929	0.893	0	0.246	0.993
PGUG_02251	PGUG_04408	1857342	1854441	4929.XP_001486580.1	4929.XP_001483679.1	0	0	0	0	0.929	0.893	0	0.214	0.993
PGUG_02291	SPB1	1857382	1854816	4929.XP_001486620.1	4929.XP_001484054.1	0	0	0	0	0.971	0.766	0	0.114	0.993
PGUG_01465	PGUG_04476	1856556	1854509	4929.XP_001485794.1	4929.XP_001483747.1	0	0	0	0	0.929	0.893	0	0.176	0.993
PGUG_01891	PGUG_02744	1856982	1855777	4929.XP_001486220.1	4929.XP_001485015.1	0.098	0	0	0	0.929	0.893	0	0.115	0.993
PGUG_02797	PGUG_03700	1855830	1855081	4929.XP_001485068.1	4929.XP_001484319.1	0	0	0	0	0.929	0.893	0	0.219	0.993
PGUG_00961	PGUG_05746	1858346	1852745	4929.XP_001487584.1	4929.XP_001481983.1	0	0	0.405	0.740	0.826	0.954	0	0.761	0.993
PGUG_04476	PGUG_03990	1854509	1854023	4929.XP_001483747.1	4929.XP_001483261.1	0	0	0	0	0.929	0.893	0	0.252	0.993
PGUG_00363	PGUG_03700	1857748	1855081	4929.XP_001486986.1	4929.XP_001484319.1	0	0	0	0	0.929	0.893	0	0.199	0.993
PGUG_00379	PGUG_01465	1857765	1856556	4929.XP_001487003.1	4929.XP_001485794.1	0.089	0	0	0	0.929	0.893	0	0.127	0.993
PGUG_00657	PGUG_01465	1858042	1856556	4929.XP_001487280.1	4929.XP_001485794.1	0.098	0	0	0	0.929	0.893	0	0.182	0.993
PGUG_05105	PGUG_05491	1853912	1853233	4929.XP_001483150.1	4929.XP_001482471.1	0.098	0	0	0	0.929	0.893	0	0.217	0.993
PGUG_02744	PGUG_05491	1855777	1853233	4929.XP_001485015.1	4929.XP_001482471.1	0.089	0	0	0	0.929	0.893	0	0.195	0.993
PGUG_02797	PGUG_05491	1855830	1853233	4929.XP_001485068.1	4929.XP_001482471.1	0	0	0	0	0.929	0.893	0	0.207	0.993
PGUG_00951	PGUG_01282	1858336	1856373	4929.XP_001487574.1	4929.XP_001485611.1	0.176	0.176	0	0	0.094	0.271	0.900	0.887	0.993
PGUG_00436	PGUG_03409	1857821	1854790	4929.XP_001487059.1	4929.XP_001484028.1	0	0	0.428	0.802	0.929	0.889	0	0.892	0.993
PGUG_03638	PGUG_05105	1855018	1853912	4929.XP_001484256.1	4929.XP_001483150.1	0.098	0	0	0	0.929	0.893	0	0.139	0.993
PGUG_05105	PGUG_04739	1853912	1853546	4929.XP_001483150.1	4929.XP_001482784.1	0	0	0	0	0.929	0.893	0	0.166	0.993
PGUG_00436	PGUG_01967	1857821	1857058	4929.XP_001487059.1	4929.XP_001486296.1	0	0	0.456	0.819	0.929	0.890	0	0.856	0.993
PGUG_01171	PGUG_02658	1858556	1855691	4929.XP_001487794.1	4929.XP_001484929.1	0.076	0	0	0	0.929	0.893	0	0.201	0.993
PGUG_02251	PGUG_05785	1857342	1852785	4929.XP_001486580.1	4929.XP_001482023.1	0.054	0	0	0	0.929	0.893	0	0.235	0.993
PGUG_01180	PGUG_04335	1858565	1854368	4929.XP_001487803.1	4929.XP_001483606.1	0	0	0	0	0.524	0.376	0.900	0.799	0.993
PGUG_03700	PGUG_04739	1855081	1853546	4929.XP_001484319.1	4929.XP_001482784.1	0	0	0	0	0.929	0.893	0	0.261	0.993
PGUG_00383	PGUG_02797	1857768	1855830	4929.XP_001487006.1	4929.XP_001485068.1	0	0	0	0	0.929	0.893	0	0.217	0.993
PGUG_05105	RPS1	1853912	1853516	4929.XP_001483150.1	4929.XP_001482754.1	0	0	0	0	0.929	0.893	0	0.250	0.993
PGUG_02658	PGUG_03619	1855691	1855000	4929.XP_001484929.1	4929.XP_001484238.1	0.098	0	0	0	0.929	0.893	0	0.190	0.993
EFT2	PGUG_05417	1855945	1853159	4929.XP_001485183.1	4929.XP_001482397.1	0.065	0	0	0	0.924	0.881	0	0.323	0.993
PGUG_02251	PGUG_04476	1857342	1854509	4929.XP_001486580.1	4929.XP_001483747.1	0	0	0	0	0.941	0.893	0	0.118	0.993
PGUG_00379	PGUG_02251	1857765	1857342	4929.XP_001487003.1	4929.XP_001486580.1	0.060	0	0	0	0.929	0.893	0	0.164	0.993
PGUG_00379	PGUG_05491	1857765	1853233	4929.XP_001487003.1	4929.XP_001482471.1	0.089	0	0	0	0.912	0.893	0	0.324	0.993
PGUG_02119	PGUG_04079	1857210	1854112	4929.XP_001486448.1	4929.XP_001483350.1	0	0	0	0	0.865	0.893	0	0.605	0.993
PGUG_02849	PGUG_04210	1855882	1854243	4929.XP_001485120.1	4929.XP_001483481.1	0	0	0	0	0.727	0.829	0	0.873	0.993
PGUG_00719	RPS0	1858104	1855403	4929.XP_001487342.1	4929.XP_001484641.1	0	0	0	0	0.929	0.893	0	0.173	0.993
PGUG_00719	PGUG_02539	1858104	1855572	4929.XP_001487342.1	4929.XP_001484810.1	0	0	0	0	0.929	0.893	0	0.237	0.993
PGUG_00363	PGUG_03619	1857748	1855000	4929.XP_001486986.1	4929.XP_001484238.1	0	0	0	0	0.929	0.893	0	0.216	0.993
PGUG_01891	PGUG_01465	1856982	1856556	4929.XP_001486220.1	4929.XP_001485794.1	0.098	0	0	0	0.929	0.893	0	0.165	0.993
PGUG_01967	PGUG_04109	1857058	1854142	4929.XP_001486296.1	4929.XP_001483380.1	0	0	0.403	0.790	0.929	0.883	0	0.856	0.993
PGUG_02028	PGUG_02798	1857119	1855831	4929.XP_001486357.1	4929.XP_001485069.1	0	0	0	0	0.929	0.893	0	0.216	0.993
PGUG_05105	PGUG_05785	1853912	1852785	4929.XP_001483150.1	4929.XP_001482023.1	0.098	0	0	0	0.929	0.893	0	0.214	0.993
PGUG_03638	PGUG_05417	1855018	1853159	4929.XP_001484256.1	4929.XP_001482397.1	0.095	0	0	0	0.929	0.893	0	0.192	0.993
PGUG_03638	PGUG_05785	1855018	1852785	4929.XP_001484256.1	4929.XP_001482023.1	0	0	0	0	0.929	0.893	0	0.155	0.993
PGUG_02545	PGUG_04207	1855578	1854240	4929.XP_001484816.1	4929.XP_001483478.1	0	0	0	0	0.929	0.893	0	0.254	0.993
PGUG_02028	PGUG_04375	1857119	1854408	4929.XP_001486357.1	4929.XP_001483646.1	0	0	0	0	0.929	0.893	0	0.264	0.993
PGUG_04375	PGUG_05105	1854408	1853912	4929.XP_001483646.1	4929.XP_001483150.1	0.176	0	0	0	0.929	0.893	0	0.142	0.993
PGUG_00383	PGUG_05785	1857768	1852785	4929.XP_001487006.1	4929.XP_001482023.1	0.098	0	0	0	0.929	0.893	0	0.165	0.993
PGUG_00436	PGUG_02488	1857821	1855521	4929.XP_001487059.1	4929.XP_001484759.1	0	0	0.450	0.836	0.929	0.893	0	0.892	0.993
PGUG_01171	PGUG_01951	1858556	1857042	4929.XP_001487794.1	4929.XP_001486280.1	0.076	0	0	0	0.929	0.893	0	0.138	0.993
PGUG_03619	PGUG_05105	1855000	1853912	4929.XP_001484238.1	4929.XP_001483150.1	0.098	0	0	0	0.929	0.893	0	0.165	0.993
PGUG_03145	HAM1	1856178	1855702	4929.XP_001485416.1	4929.XP_001484940.1	0.134	0	0	0	0.094	0.574	0.900	0.843	0.993
PGUG_01465	PGUG_03638	1856556	1855018	4929.XP_001485794.1	4929.XP_001484256.1	0.098	0	0	0	0.929	0.891	0	0.138	0.993
PGUG_01007	PGUG_02251	1858392	1857342	4929.XP_001487630.1	4929.XP_001486580.1	0	0	0	0	0.929	0.893	0	0.198	0.993
PGUG_00379	RPS1	1857765	1853516	4929.XP_001487003.1	4929.XP_001482754.1	0	0	0	0	0.929	0.893	0	0.219	0.993
PGUG_00939	PGUG_03817	1858324	1855198	4929.XP_001487562.1	4929.XP_001484436.1	0.176	0	0	0	0.680	0.137	0.900	0.770	0.993
PGUG_01465	PGUG_04207	1856556	1854240	4929.XP_001485794.1	4929.XP_001483478.1	0	0	0	0	0.929	0.893	0	0.237	0.993
PGUG_02798	PGUG_05105	1855831	1853912	4929.XP_001485069.1	4929.XP_001483150.1	0	0	0	0	0.929	0.893	0	0.217	0.993
PGUG_01007	PGUG_01465	1858392	1856556	4929.XP_001487630.1	4929.XP_001485794.1	0	0	0	0	0.929	0.893	0	0.165	0.993
PGUG_02798	PGUG_04207	1855831	1854240	4929.XP_001485069.1	4929.XP_001483478.1	0	0	0	0	0.929	0.893	0	0.266	0.993
PGUG_02911	PGUG_03817	1855944	1855198	4929.XP_001485182.1	4929.XP_001484436.1	0.219	0	0	0	0.737	0.138	0.900	0.697	0.993
PGUG_02028	PGUG_03638	1857119	1855018	4929.XP_001486357.1	4929.XP_001484256.1	0	0	0	0	0.929	0.893	0	0.217	0.993
PGUG_01171	PGUG_04375	1858556	1854408	4929.XP_001487794.1	4929.XP_001483646.1	0	0	0	0	0.929	0.893	0	0.234	0.993
PGUG_02028	PGUG_02744	1857119	1855777	4929.XP_001486357.1	4929.XP_001485015.1	0	0	0	0	0.929	0.893	0	0.217	0.993
PGUG_03619	PGUG_03990	1855000	1854023	4929.XP_001484238.1	4929.XP_001483261.1	0.098	0	0	0	0.929	0.893	0	0.215	0.993
PGUG_01171	RPS1	1858556	1853516	4929.XP_001487794.1	4929.XP_001482754.1	0	0	0.200	0	0.929	0.893	0	0.075	0.993
PGUG_01465	RPS0	1856556	1855403	4929.XP_001485794.1	4929.XP_001484641.1	0.091	0	0	0	0.929	0.893	0	0.165	0.993
PGUG_02797	PGUG_03619	1855830	1855000	4929.XP_001485068.1	4929.XP_001484238.1	0	0	0	0	0.929	0.893	0	0.208	0.993
PGUG_00383	PGUG_02089	1857768	1857180	4929.XP_001487006.1	4929.XP_001486418.1	0	0	0	0	0.929	0.893	0	0.217	0.993
PGUG_01007	PGUG_02545	1858392	1855578	4929.XP_001487630.1	4929.XP_001484816.1	0	0	0	0	0.929	0.893	0	0.246	0.993
PGUG_02251	PGUG_04739	1857342	1853546	4929.XP_001486580.1	4929.XP_001482784.1	0	0	0	0	0.929	0.893	0	0.182	0.993
PGUG_01465	PGUG_04408	1856556	1854441	4929.XP_001485794.1	4929.XP_001483679.1	0	0	0	0	0.929	0.893	0	0.237	0.993
PGUG_01317	PGUG_03808	1856408	1855189	4929.XP_001485646.1	4929.XP_001484427.1	0.176	0.001	0	0	0.685	0.277	0.900	0.702	0.993
PGUG_02797	PGUG_04476	1855830	1854509	4929.XP_001485068.1	4929.XP_001483747.1	0	0	0	0	0.929	0.893	0	0.215	0.993
PGUG_04476	PGUG_04739	1854509	1853546	4929.XP_001483747.1	4929.XP_001482784.1	0	0	0	0	0.929	0.884	0	0.314	0.993
PGUG_01171	PGUG_02089	1858556	1857180	4929.XP_001487794.1	4929.XP_001486418.1	0	0	0	0	0.929	0.893	0	0.216	0.993
PGUG_02028	PGUG_05785	1857119	1852785	4929.XP_001486357.1	4929.XP_001482023.1	0	0	0	0	0.929	0.893	0	0.214	0.993
PGUG_02251	PGUG_01465	1857342	1856556	4929.XP_001486580.1	4929.XP_001485794.1	0.072	0	0	0	0.929	0.893	0	0.214	0.993
PGUG_02539	PGUG_04739	1855572	1853546	4929.XP_001484810.1	4929.XP_001482784.1	0	0	0	0	0.929	0.886	0	0.213	0.993
PGUG_00436	PGUG_04109	1857821	1854142	4929.XP_001487059.1	4929.XP_001483380.1	0	0	0.444	0.855	0.929	0.887	0	0.887	0.993
PGUG_01951	PGUG_05785	1857042	1852785	4929.XP_001486280.1	4929.XP_001482023.1	0.098	0	0	0	0.929	0.893	0	0.216	0.993
PGUG_01891	PGUG_05105	1856982	1853912	4929.XP_001486220.1	4929.XP_001483150.1	0.098	0	0	0	0.929	0.893	0	0.165	0.993
PGUG_01171	PGUG_01465	1858556	1856556	4929.XP_001487794.1	4929.XP_001485794.1	0.076	0	0	0	0.929	0.893	0	0.234	0.993
PGUG_02908	PGUG_03389	1855941	1854770	4929.XP_001485179.1	4929.XP_001484008.1	0	0	0	0	0.929	0.276	0	0.889	0.993
PGUG_00719	PGUG_00379	1858104	1857765	4929.XP_001487342.1	4929.XP_001487003.1	0.162	0	0	0	0.929	0.893	0	0.114	0.993
PGUG_01007	PGUG_03619	1858392	1855000	4929.XP_001487630.1	4929.XP_001484238.1	0	0	0	0	0.929	0.893	0	0.267	0.993
PGUG_04067	PGUG_04739	1854100	1853546	4929.XP_001483338.1	4929.XP_001482784.1	0	0	0	0	0.929	0.893	0	0.215	0.993
PGUG_00657	PGUG_03700	1858042	1855081	4929.XP_001487280.1	4929.XP_001484319.1	0	0	0	0	0.929	0.893	0	0.215	0.993
PGUG_02744	PGUG_04476	1855777	1854509	4929.XP_001485015.1	4929.XP_001483747.1	0	0	0	0	0.929	0.893	0	0.214	0.993
PGUG_00383	PGUG_02744	1857768	1855777	4929.XP_001487006.1	4929.XP_001485015.1	0.098	0	0	0	0.929	0.893	0	0.193	0.993
PGUG_02658	PGUG_05105	1855691	1853912	4929.XP_001484929.1	4929.XP_001483150.1	0.098	0	0	0	0.929	0.893	0	0.187	0.993
PGUG_02251	PGUG_03700	1857342	1855081	4929.XP_001486580.1	4929.XP_001484319.1	0	0	0	0	0.929	0.893	0	0.216	0.993
PGUG_02797	PGUG_05105	1855830	1853912	4929.XP_001485068.1	4929.XP_001483150.1	0	0	0	0	0.929	0.893	0	0.244	0.993
PGUG_03808	PGUG_04596	1855189	1854629	4929.XP_001484427.1	4929.XP_001483867.1	0.176	0.001	0	0	0.685	0.277	0.900	0.702	0.993
PGUG_00979	PGUG_05746	1858364	1852745	4929.XP_001487602.1	4929.XP_001481983.1	0	0	0	0	0.804	0.893	0	0.723	0.993
PGUG_00379	PGUG_02797	1857765	1855830	4929.XP_001487003.1	4929.XP_001485068.1	0	0	0	0	0.929	0.893	0	0.216	0.993
PGUG_00363	PGUG_03990	1857748	1854023	4929.XP_001486986.1	4929.XP_001483261.1	0	0	0	0	0.929	0.893	0	0.051	0.992
PGUG_02951	PGUG_05419	1855984	1853161	4929.XP_001485222.1	4929.XP_001482399.1	0	0	0	0	0.242	0.812	0.800	0.777	0.992
PGUG_02251	PGUG_02744	1857342	1855777	4929.XP_001486580.1	4929.XP_001485015.1	0.053	0	0	0	0.929	0.893	0	0.113	0.992
PGUG_04739	PGUG_05785	1853546	1852785	4929.XP_001482784.1	4929.XP_001482023.1	0	0	0	0	0.929	0.893	0	0.100	0.992
PGUG_00363	PGUG_04067	1857748	1854100	4929.XP_001486986.1	4929.XP_001483338.1	0	0	0	0	0.929	0.893	0	0.075	0.992
PGUG_00363	PGUG_02798	1857748	1855831	4929.XP_001486986.1	4929.XP_001485069.1	0	0	0	0	0.929	0.893	0	0.139	0.992
PGUG_01007	EFT2	1858392	1855945	4929.XP_001487630.1	4929.XP_001485183.1	0	0	0	0	0.929	0.832	0	0.444	0.992
PGUG_00379	PGUG_02744	1857765	1855777	4929.XP_001487003.1	4929.XP_001485015.1	0	0	0	0	0.929	0.893	0	0.075	0.992
PGUG_00363	PGUG_03816	1857748	1855197	4929.XP_001486986.1	4929.XP_001484435.1	0	0	0	0	0.929	0.893	0	0	0.992
PGUG_02028	PGUG_01951	1857119	1857042	4929.XP_001486357.1	4929.XP_001486280.1	0	0	0	0	0.929	0.893	0	0.118	0.992
PGUG_03816	PGUG_04476	1855197	1854509	4929.XP_001484435.1	4929.XP_001483747.1	0	0	0	0	0.929	0.893	0	0.053	0.992
PGUG_02251	PGUG_03816	1857342	1855197	4929.XP_001486580.1	4929.XP_001484435.1	0	0	0	0	0.929	0.893	0	0.140	0.992
PGUG_02251	PGUG_05105	1857342	1853912	4929.XP_001486580.1	4929.XP_001483150.1	0.066	0	0	0	0.929	0.893	0	0.065	0.992
PGUG_02279	PGUG_02542	1857370	1855575	4929.XP_001486608.1	4929.XP_001484813.1	0	0	0	0	0.503	0.893	0	0.870	0.992
MDE1	MRI1	1855893	1853738	4929.XP_001485131.1	4929.XP_001482976.1	0.098	0	0.301	0	0.103	0	0.900	0.885	0.992
PGUG_01007	PGUG_03700	1858392	1855081	4929.XP_001487630.1	4929.XP_001484319.1	0	0	0	0	0.929	0.893	0	0.123	0.992
PGUG_02488	PGUG_03409	1855521	1854790	4929.XP_001484759.1	4929.XP_001484028.1	0	0	0.368	0.828	0.929	0.879	0	0.891	0.992
PGUG_00383	PGUG_02251	1857768	1857342	4929.XP_001487006.1	4929.XP_001486580.1	0.074	0	0	0	0.929	0.893	0	0.077	0.992
PGUG_00719	PGUG_02251	1858104	1857342	4929.XP_001487342.1	4929.XP_001486580.1	0	0	0	0	0.929	0.893	0	0.140	0.992
PGUG_04266	PGUG_05295	1854300	1853037	4929.XP_001483538.1	4929.XP_001482275.1	0	0.190	0	0	0.603	0	0.900	0.781	0.992
PGUG_03700	RPS1	1855081	1853516	4929.XP_001484319.1	4929.XP_001482754.1	0	0	0	0	0.929	0.893	0	0.053	0.992
PGUG_00363	PGUG_02744	1857748	1855777	4929.XP_001486986.1	4929.XP_001485015.1	0	0	0	0	0.929	0.893	0	0.096	0.992
PGUG_02938	PGUG_02424	1855971	1855457	4929.XP_001485209.1	4929.XP_001484695.1	0	0	0	0	0.679	0.813	0	0.889	0.992
PGUG_02624	PGUG_03700	1855657	1855081	4929.XP_001484895.1	4929.XP_001484319.1	0	0	0	0	0.929	0.893	0	0.115	0.992
PGUG_03982	PGUG_04771	1854015	1853578	4929.XP_001483253.1	4929.XP_001482816.1	0.098	0.671	0	0	0.048	0	0.900	0.784	0.992
PGUG_02089	PGUG_04476	1857180	1854509	4929.XP_001486418.1	4929.XP_001483747.1	0	0	0	0	0.929	0.893	0	0	0.992
PGUG_03638	PGUG_04476	1855018	1854509	4929.XP_001484256.1	4929.XP_001483747.1	0	0	0	0	0.929	0.893	0	0.055	0.992
PGUG_00363	PGUG_04476	1857748	1854509	4929.XP_001486986.1	4929.XP_001483747.1	0	0	0	0	0.929	0.893	0	0.067	0.992
PGUG_01171	PGUG_00363	1858556	1857748	4929.XP_001487794.1	4929.XP_001486986.1	0	0	0	0	0.929	0.893	0	0.103	0.992
PGUG_02658	PGUG_04739	1855691	1853546	4929.XP_001484929.1	4929.XP_001482784.1	0	0	0	0	0.929	0.893	0	0.092	0.992
PGUG_01465	PGUG_02798	1856556	1855831	4929.XP_001485794.1	4929.XP_001485069.1	0	0	0	0	0.929	0.893	0	0.059	0.992
PGUG_02251	PGUG_02545	1857342	1855578	4929.XP_001486580.1	4929.XP_001484816.1	0.076	0	0	0	0.929	0.893	0	0.077	0.992
PGUG_02742	RIB1	1855775	1854060	4929.XP_001485013.1	4929.XP_001483298.1	0	0.900	0.437	0	0.046	0	0	0.881	0.992
PGUG_00363	PGUG_02658	1857748	1855691	4929.XP_001486986.1	4929.XP_001484929.1	0	0	0	0	0.929	0.893	0	0.057	0.992
PGUG_02251	PGUG_02658	1857342	1855691	4929.XP_001486580.1	4929.XP_001484929.1	0.054	0	0	0	0.929	0.893	0	0.099	0.992
PGUG_00719	PGUG_00363	1858104	1857748	4929.XP_001487342.1	4929.XP_001486986.1	0	0	0	0	0.929	0.893	0	0	0.992
PGUG_02089	PGUG_01465	1857180	1856556	4929.XP_001486418.1	4929.XP_001485794.1	0	0	0	0	0.929	0.893	0	0	0.992
PGUG_01465	RPS1	1856556	1853516	4929.XP_001485794.1	4929.XP_001482754.1	0	0	0	0	0.929	0.893	0	0.080	0.992
PGUG_01074	PGUG_05000	1858459	1853807	4929.XP_001487697.1	4929.XP_001483045.1	0.065	0	0	0	0.247	0.124	0.900	0.892	0.992
PGUG_00363	PGUG_02797	1857748	1855830	4929.XP_001486986.1	4929.XP_001485068.1	0	0	0	0	0.929	0.893	0	0.067	0.992
PGUG_02251	PGUG_04375	1857342	1854408	4929.XP_001486580.1	4929.XP_001483646.1	0	0	0	0	0.929	0.893	0	0.140	0.992
PGUG_02028	PGUG_02624	1857119	1855657	4929.XP_001486357.1	4929.XP_001484895.1	0	0	0	0	0.929	0.893	0	0.114	0.992
PGUG_02797	RPS0	1855830	1855403	4929.XP_001485068.1	4929.XP_001484641.1	0.047	0	0	0	0.929	0.893	0	0.051	0.992
PGUG_02028	PGUG_03619	1857119	1855000	4929.XP_001486357.1	4929.XP_001484238.1	0	0	0	0	0.929	0.893	0	0.051	0.992
PGUG_02089	PGUG_05105	1857180	1853912	4929.XP_001486418.1	4929.XP_001483150.1	0	0	0	0	0.929	0.893	0	0.144	0.992
PGUG_00814	PGUG_01872	1858199	1856963	4929.XP_001487437.1	4929.XP_001486201.1	0	0	0	0	0.603	0.954	0	0.627	0.992
PGUG_02624	PGUG_04739	1855657	1853546	4929.XP_001484895.1	4929.XP_001482784.1	0	0	0	0	0.929	0.893	0	0.114	0.992
PGUG_00363	PGUG_04207	1857748	1854240	4929.XP_001486986.1	4929.XP_001483478.1	0	0	0	0	0.929	0.893	0	0.096	0.992
PGUG_00363	PGUG_01891	1857748	1856982	4929.XP_001486986.1	4929.XP_001486220.1	0	0	0	0	0.929	0.893	0	0	0.992
RPS0	PGUG_04476	1855403	1854509	4929.XP_001484641.1	4929.XP_001483747.1	0	0	0	0	0.929	0.893	0	0.105	0.992
PGUG_01171	PGUG_03619	1858556	1855000	4929.XP_001487794.1	4929.XP_001484238.1	0.076	0	0	0	0.929	0.880	0	0.112	0.992
PGUG_00979	PGUG_04520	1858364	1854553	4929.XP_001487602.1	4929.XP_001483791.1	0	0	0	0	0.830	0.893	0	0.606	0.992
PGUG_01951	PGUG_02797	1857042	1855830	4929.XP_001486280.1	4929.XP_001485068.1	0	0	0	0	0.929	0.893	0	0.114	0.992
PGUG_04476	PGUG_05491	1854509	1853233	4929.XP_001483747.1	4929.XP_001482471.1	0	0	0	0	0.929	0.893	0	0.075	0.992
PGUG_01325	MET3	1856416	1853890	4929.XP_001485654.1	4929.XP_001483128.1	0.219	0	0	0	0.966	0	0	0.731	0.992
PGUG_00951	RKI1	1858336	1857118	4929.XP_001487574.1	4929.XP_001486356.1	0.219	0	0	0	0.128	0.137	0.900	0.892	0.992
PGUG_02545	PGUG_04476	1855578	1854509	4929.XP_001484816.1	4929.XP_001483747.1	0	0	0	0	0.929	0.893	0	0.140	0.992
PGUG_02488	PGUG_04399	1855521	1854432	4929.XP_001484759.1	4929.XP_001483670.1	0	0	0.444	0.812	0.929	0.876	0	0.856	0.992
PGUG_00926	PGUG_03724	1858311	1855105	4929.XP_001487549.1	4929.XP_001484343.1	0.219	0	0	0	0.178	0	0.900	0.892	0.992
PGUG_02028	RPS0	1857119	1855403	4929.XP_001486357.1	4929.XP_001484641.1	0	0	0	0	0.929	0.893	0	0.069	0.992
RPS0	PGUG_04739	1855403	1853546	4929.XP_001484641.1	4929.XP_001482784.1	0	0	0	0	0.929	0.893	0	0.114	0.992
PGUG_04739	PGUG_05491	1853546	1853233	4929.XP_001482784.1	4929.XP_001482471.1	0	0	0	0	0.929	0.893	0	0.139	0.992
PGUG_01084	PGUG_05463	1858469	1853205	4929.XP_001487707.1	4929.XP_001482443.1	0	0	0	0	0.345	0.954	0	0.780	0.992
PGUG_01465	PGUG_03700	1856556	1855081	4929.XP_001485794.1	4929.XP_001484319.1	0	0	0	0	0.929	0.893	0	0.123	0.992
PGUG_00703	PGUG_01695	1858088	1856786	4929.XP_001487326.1	4929.XP_001486024.1	0.080	0	0	0	0.684	0	0.900	0.780	0.992
PGUG_02787	PGUG_05465	1855820	1853207	4929.XP_001485058.1	4929.XP_001482445.1	0.176	0	0	0	0.593	0.254	0.900	0.760	0.992
PGUG_00363	PGUG_01465	1857748	1856556	4929.XP_001486986.1	4929.XP_001485794.1	0	0	0	0	0.929	0.893	0	0.068	0.992
PGUG_00756	PGUG_04817	1858141	1853624	4929.XP_001487379.1	4929.XP_001482862.1	0	0	0	0	0.737	0.809	0	0.867	0.992
PGUG_00363	PGUG_04375	1857748	1854408	4929.XP_001486986.1	4929.XP_001483646.1	0	0	0	0	0.929	0.893	0	0.085	0.992
PGUG_02251	PGUG_02624	1857342	1855657	4929.XP_001486580.1	4929.XP_001484895.1	0.095	0	0	0	0.929	0.893	0	0.057	0.992
PGUG_02251	PGUG_03619	1857342	1855000	4929.XP_001486580.1	4929.XP_001484238.1	0.064	0	0	0	0.929	0.893	0	0.094	0.992
PGUG_02279	PGUG_02541	1857370	1855574	4929.XP_001486608.1	4929.XP_001484812.1	0	0	0	0	0.119	0.836	0.800	0.774	0.992
PGUG_02545	PGUG_04739	1855578	1853546	4929.XP_001484816.1	4929.XP_001482784.1	0	0	0	0	0.929	0.893	0	0.069	0.992
PGUG_01465	PGUG_02744	1856556	1855777	4929.XP_001485794.1	4929.XP_001485015.1	0.098	0	0	0	0.929	0.893	0	0.051	0.992
PGUG_02028	PGUG_03816	1857119	1855197	4929.XP_001486357.1	4929.XP_001484435.1	0	0	0	0	0.929	0.893	0	0.114	0.992
PGUG_02488	PGUG_03627	1855521	1855008	4929.XP_001484759.1	4929.XP_001484246.1	0	0	0.435	0.712	0.929	0.841	0	0.889	0.992
PGUG_00383	PGUG_02028	1857768	1857119	4929.XP_001487006.1	4929.XP_001486357.1	0	0	0	0	0.929	0.893	0	0.104	0.992
PGUG_01171	PGUG_04476	1858556	1854509	4929.XP_001487794.1	4929.XP_001483747.1	0	0	0	0	0.929	0.893	0	0.103	0.992
PGUG_01465	PGUG_02797	1856556	1855830	4929.XP_001485794.1	4929.XP_001485068.1	0	0	0	0	0.929	0.893	0	0.067	0.992
PGUG_00363	PGUG_05785	1857748	1852785	4929.XP_001486986.1	4929.XP_001482023.1	0	0	0	0	0.929	0.893	0	0.140	0.992
PGUG_02624	PGUG_04476	1855657	1854509	4929.XP_001484895.1	4929.XP_001483747.1	0	0	0	0	0.929	0.893	0	0.117	0.992
EFT2	PGUG_02545	1855945	1855578	4929.XP_001485183.1	4929.XP_001484816.1	0.065	0	0	0	0.929	0.833	0	0.369	0.992
PGUG_04476	RPS1	1854509	1853516	4929.XP_001483747.1	4929.XP_001482754.1	0	0	0	0	0.929	0.893	0	0.066	0.992
PGUG_02089	PGUG_05491	1857180	1853233	4929.XP_001486418.1	4929.XP_001482471.1	0	0	0	0	0.929	0.893	0	0.072	0.992
PGUG_00719	PGUG_00383	1858104	1857768	4929.XP_001487342.1	4929.XP_001487006.1	0	0	0	0	0.929	0.893	0	0.113	0.992
PGUG_00752	AAH1	1858137	1856655	4929.XP_001487375.1	4929.XP_001485893.1	0	0	0	0	0.052	0.455	0.900	0.873	0.992
PGUG_02744	RPS0	1855777	1855403	4929.XP_001485015.1	4929.XP_001484641.1	0	0	0	0	0.929	0.893	0	0.114	0.992
PGUG_00207	PGUG_05396	1857592	1853138	4929.XP_001486830.1	4929.XP_001482376.1	0.219	0	0.201	0	0.614	0	0.900	0.745	0.992
PGUG_02251	PGUG_02539	1857342	1855572	4929.XP_001486580.1	4929.XP_001484810.1	0.076	0	0	0	0.929	0.893	0	0.112	0.992
PGUG_03619	PGUG_04408	1855000	1854441	4929.XP_001484238.1	4929.XP_001483679.1	0	0	0	0	0.929	0.893	0	0.149	0.992
PGUG_02028	PGUG_02545	1857119	1855578	4929.XP_001486357.1	4929.XP_001484816.1	0	0	0	0	0.929	0.880	0	0.176	0.992
PGUG_00383	PGUG_04476	1857768	1854509	4929.XP_001487006.1	4929.XP_001483747.1	0	0	0	0	0.929	0.893	0	0	0.992
PGUG_02251	RPS1	1857342	1853516	4929.XP_001486580.1	4929.XP_001482754.1	0	0	0	0	0.929	0.893	0	0.115	0.992
PGUG_00719	PGUG_04739	1858104	1853546	4929.XP_001487342.1	4929.XP_001482784.1	0	0	0	0	0.929	0.893	0	0.103	0.992
PGUG_00363	PGUG_03638	1857748	1855018	4929.XP_001486986.1	4929.XP_001484256.1	0	0	0	0	0.929	0.893	0	0.087	0.992
PGUG_01007	PGUG_00363	1858392	1857748	4929.XP_001487630.1	4929.XP_001486986.1	0	0	0	0	0.929	0.893	0	0.066	0.992
PGUG_01171	PGUG_02028	1858556	1857119	4929.XP_001487794.1	4929.XP_001486357.1	0	0	0	0	0.929	0.893	0	0.122	0.992
PGUG_00363	PGUG_02028	1857748	1857119	4929.XP_001486986.1	4929.XP_001486357.1	0	0	0	0	0.929	0.893	0	0.069	0.992
PGUG_01891	PGUG_03700	1856982	1855081	4929.XP_001486220.1	4929.XP_001484319.1	0	0	0	0	0.929	0.893	0	0.050	0.992
PGUG_00363	PGUG_02624	1857748	1855657	4929.XP_001486986.1	4929.XP_001484895.1	0	0	0	0	0.929	0.893	0	0.051	0.992
PGUG_02028	PGUG_04476	1857119	1854509	4929.XP_001486357.1	4929.XP_001483747.1	0	0	0	0	0.929	0.893	0	0.068	0.992
PGUG_01007	PGUG_05785	1858392	1852785	4929.XP_001487630.1	4929.XP_001482023.1	0	0	0	0	0.929	0.893	0	0.146	0.992
PGUG_04408	PGUG_04739	1854441	1853546	4929.XP_001483679.1	4929.XP_001482784.1	0	0	0	0	0.929	0.893	0	0.140	0.992
PGUG_02028	PGUG_02539	1857119	1855572	4929.XP_001486357.1	4929.XP_001484810.1	0	0	0	0	0.929	0.885	0	0.146	0.992
PGUG_02251	PGUG_03638	1857342	1855018	4929.XP_001486580.1	4929.XP_001484256.1	0.053	0	0	0	0.929	0.893	0	0.140	0.992
PGUG_03816	PGUG_05417	1855197	1853159	4929.XP_001484435.1	4929.XP_001482397.1	0	0	0	0	0.929	0.893	0	0.114	0.992
PGUG_00383	PGUG_00363	1857768	1857748	4929.XP_001487006.1	4929.XP_001486986.1	0	0	0	0	0.929	0.893	0	0	0.992
PGUG_02251	PGUG_03990	1857342	1854023	4929.XP_001486580.1	4929.XP_001483261.1	0.064	0	0	0	0.929	0.893	0	0.087	0.992
PGUG_02908	PGUG_04670	1855941	1853477	4929.XP_001485179.1	4929.XP_001482715.1	0	0	0	0	0.737	0.767	0	0.886	0.992
PGUG_02089	PGUG_02028	1857180	1857119	4929.XP_001486418.1	4929.XP_001486357.1	0	0	0	0	0.929	0.893	0	0.119	0.992
PGUG_00657	PGUG_04739	1858042	1853546	4929.XP_001487280.1	4929.XP_001482784.1	0	0	0	0	0.929	0.893	0	0.114	0.992
PGUG_01035	PGUG_01002	1858420	1858387	4929.XP_001487658.1	4929.XP_001487625.1	0.064	0	0.286	0	0.095	0.128	0.900	0.892	0.992
PGUG_02089	PGUG_02545	1857180	1855578	4929.XP_001486418.1	4929.XP_001484816.1	0	0	0	0	0.916	0.893	0	0.217	0.992
PGUG_00383	PGUG_04739	1857768	1853546	4929.XP_001487006.1	4929.XP_001482784.1	0	0	0	0	0.929	0.893	0	0.050	0.992
PGUG_00363	PGUG_05105	1857748	1853912	4929.XP_001486986.1	4929.XP_001483150.1	0	0	0	0	0.929	0.893	0	0.113	0.992
PGUG_03627	PGUG_04399	1855008	1854432	4929.XP_001484246.1	4929.XP_001483670.1	0	0	0.411	0.677	0.929	0.808	0	0.869	0.991
PGUG_01327	PGUG_04538	1856418	1854571	4929.XP_001485656.1	4929.XP_001483809.1	0	0	0	0	0.560	0.893	0	0.826	0.991
PGUG_00926	PGUG_03808	1858311	1855189	4929.XP_001487549.1	4929.XP_001484427.1	0.208	0	0	0	0.916	0	0	0.878	0.991
RIB5	PGUG_02742	1857891	1855775	4929.XP_001487129.1	4929.XP_001485013.1	0.176	0.880	0.477	0	0.098	0.209	0	0.805	0.991
PGUG_00307	PGUG_03757	1857692	1855138	4929.XP_001486930.1	4929.XP_001484376.1	0.179	0	0	0	0.053	0.065	0.900	0.900	0.991
PGUG_04520	PGUG_04079	1854553	1854112	4929.XP_001483791.1	4929.XP_001483350.1	0	0	0.249	0.817	0.906	0.893	0	0.890	0.991
PGUG_00926	PGUG_05240	1858311	1852982	4929.XP_001487549.1	4929.XP_001482220.1	0.218	0	0	0	0.603	0	0.800	0.884	0.991
PGUG_00420	PGUG_05463	1857805	1853205	4929.XP_001487043.1	4929.XP_001482443.1	0	0	0	0	0.349	0.954	0	0.731	0.991
PGUG_00307	PGUG_00150	1857692	1857535	4929.XP_001486930.1	4929.XP_001486773.1	0.150	0	0	0	0.243	0.697	0.900	0.634	0.991
PGUG_00363	EFT2	1857748	1855945	4929.XP_001486986.1	4929.XP_001485183.1	0	0	0	0	0.929	0.853	0	0.240	0.991
PGUG_03619	PGUG_04476	1855000	1854509	4929.XP_001484238.1	4929.XP_001483747.1	0	0	0	0	0.921	0.893	0	0.070	0.991
PGUG_01095	PGUG_01467	1858480	1856558	4929.XP_001487718.1	4929.XP_001485796.1	0.064	0	0	0	0.583	0	0.900	0.803	0.991
PGUG_01967	PGUG_02488	1857058	1855521	4929.XP_001486296.1	4929.XP_001484759.1	0	0	0.378	0.757	0.929	0.834	0	0.881	0.991
RPS0	PGUG_05785	1855403	1852785	4929.XP_001484641.1	4929.XP_001482023.1	0	0	0	0	0.861	0.893	0	0.455	0.991
PGUG_00979	PGUG_02119	1858364	1857210	4929.XP_001487602.1	4929.XP_001486448.1	0	0	0	0	0.831	0.882	0	0.608	0.991
PGUG_01600	SPB1	1856691	1854816	4929.XP_001485929.1	4929.XP_001484054.1	0	0	0	0	0.980	0.548	0	0.131	0.991
PGUG_00476	PGUG_03480	1857861	1854861	4929.XP_001487099.1	4929.XP_001484099.1	0.219	0	0	0	0.096	0.067	0.900	0.891	0.991
PGUG_00550	PGUG_01867	1857935	1856958	4929.XP_001487173.1	4929.XP_001486196.1	0.181	0	0	0	0.684	0	0.900	0.697	0.991
PGUG_04349	PGUG_04109	1854382	1854142	4929.XP_001483620.1	4929.XP_001483380.1	0	0	0.328	0.717	0.929	0.808	0	0.887	0.990
PGUG_01327	PGUG_04817	1856418	1853624	4929.XP_001485656.1	4929.XP_001482862.1	0	0	0	0	0.687	0.769	0	0.885	0.990
PGUG_00939	PGUG_04946	1858324	1853753	4929.XP_001487562.1	4929.XP_001482991.1	0.095	0	0	0	0.424	0.278	0.900	0.780	0.990
ADK1	PGUG_00752	1858262	1858137	4929.XP_001487500.1	4929.XP_001487375.1	0.054	0	0	0	0.139	0	0.900	0.892	0.990
PGUG_01967	PGUG_04349	1857058	1854382	4929.XP_001486296.1	4929.XP_001483620.1	0	0	0.353	0.687	0.929	0.814	0	0.856	0.990
PGUG_01763	PGUG_03480	1856854	1854861	4929.XP_001486092.1	4929.XP_001484099.1	0.429	0	0	0	0.211	0	0.900	0.813	0.990
FMN1	PGUG_03322	1857669	1854703	4929.XP_001486907.1	4929.XP_001483941.1	0	0	0	0	0.097	0.132	0.900	0.889	0.990
PGUG_01967	PGUG_03409	1857058	1854790	4929.XP_001486296.1	4929.XP_001484028.1	0	0	0.272	0.834	0.929	0.838	0	0.879	0.990
EFT2	RPS1	1855945	1853516	4929.XP_001485183.1	4929.XP_001482754.1	0	0	0.219	0	0.929	0.845	0	0.042	0.990
PGUG_03409	PGUG_04349	1854790	1854382	4929.XP_001484028.1	4929.XP_001483620.1	0	0	0.275	0.697	0.929	0.807	0	0.874	0.990
PGUG_01858	PGUG_03850	1856949	1855231	4929.XP_001486187.1	4929.XP_001484469.1	0.065	0	0	0	0.529	0.209	0.900	0.769	0.990
PGUG_03627	PGUG_03409	1855008	1854790	4929.XP_001484246.1	4929.XP_001484028.1	0	0	0.376	0.742	0.929	0.811	0	0.891	0.990
PGUG_03145	PGUG_03817	1856178	1855198	4929.XP_001485416.1	4929.XP_001484436.1	0.219	0	0	0	0.372	0.061	0.900	0.824	0.990
PGUG_00833	PGUG_00671	1858218	1858056	4929.XP_001487456.1	4929.XP_001487294.1	0.064	0	0	0	0.126	0.051	0.900	0.892	0.990
PGUG_01967	PGUG_04399	1857058	1854432	4929.XP_001486296.1	4929.XP_001483670.1	0	0	0.309	0.790	0.929	0.841	0	0.856	0.990
PGUG_01621	PGUG_05463	1856712	1853205	4929.XP_001485950.1	4929.XP_001482443.1	0.219	0	0.459	0	0.542	0.812	0	0.776	0.990
PGUG_04088	PGUG_04074	1854121	1854106	4929.XP_001483359.1	4929.XP_001483344.1	0	0	0	0	0.974	0.137	0	0.623	0.990
PGUG_00833	PGUG_05000	1858218	1853807	4929.XP_001487456.1	4929.XP_001483045.1	0.050	0	0	0	0.193	0	0.900	0.892	0.990
PGUG_03842	SPB1	1855223	1854816	4929.XP_001484461.1	4929.XP_001484054.1	0	0	0	0	0.971	0.661	0	0.145	0.990
PGUG_01084	PGUG_00420	1858469	1857805	4929.XP_001487707.1	4929.XP_001487043.1	0	0	0	0	0.156	0.954	0	0.782	0.990
PGUG_00142	PGUG_02603	1857527	1855636	4929.XP_001486765.1	4929.XP_001484874.1	0.176	0	0	0	0.737	0	0.900	0.611	0.990
PGUG_04143	PGUG_05565	1854176	1853307	4929.XP_001483414.1	4929.XP_001482545.1	0.049	0	0	0	0.913	0.531	0	0.779	0.990
PGUG_01005	PGUG_03124	1858390	1856157	4929.XP_001487628.1	4929.XP_001485395.1	0	0	0	0	0.105	0.153	0.900	0.892	0.990
PGUG_01877	EFT2	1856967	1855945	4929.XP_001486205.1	4929.XP_001485183.1	0.089	0	0	0	0.929	0.814	0	0.295	0.990
PGUG_00420	PGUG_01723	1857805	1856814	4929.XP_001487043.1	4929.XP_001486052.1	0	0	0	0	0.178	0.954	0	0.776	0.990
PGUG_00055	PGUG_01505	1857440	1856596	4929.XP_001486678.1	4929.XP_001485834.1	0.054	0	0	0	0.920	0	0	0.890	0.990
PGUG_03622	PGUG_04294	1855002	1854327	4929.XP_001484240.1	4929.XP_001483565.1	0	0	0	0	0.971	0.665	0	0.115	0.990
PGUG_02488	PGUG_04109	1855521	1854142	4929.XP_001484759.1	4929.XP_001483380.1	0	0	0.432	0.816	0.929	0.834	0	0.885	0.990
PGUG_03409	PGUG_04399	1854790	1854432	4929.XP_001484028.1	4929.XP_001483670.1	0	0	0.267	0.822	0.929	0.845	0	0.826	0.990
PGUG_04538	PGUG_04079	1854571	1854112	4929.XP_001483809.1	4929.XP_001483350.1	0	0	0	0	0.736	0.893	0	0.654	0.989
PGUG_02279	PGUG_01784	1857370	1856875	4929.XP_001486608.1	4929.XP_001486113.1	0	0	0	0	0.591	0.893	0	0.781	0.989
SPB1	PGUG_05099	1854816	1853906	4929.XP_001484054.1	4929.XP_001483144.1	0	0	0	0	0.977	0.559	0	0	0.989
PGUG_03409	PGUG_04109	1854790	1854142	4929.XP_001484028.1	4929.XP_001483380.1	0	0	0.366	0.797	0.929	0.816	0	0.887	0.989
PGUG_02488	PGUG_04349	1855521	1854382	4929.XP_001484759.1	4929.XP_001483620.1	0	0	0.294	0.749	0.929	0.807	0	0.881	0.989
PGUG_04399	PGUG_04109	1854432	1854142	4929.XP_001483670.1	4929.XP_001483380.1	0	0	0.436	0.775	0.929	0.815	0	0.785	0.989
PGUG_00716	PGUG_05240	1858101	1852982	4929.XP_001487339.1	4929.XP_001482220.1	0.219	0	0	0	0.735	0	0.800	0.779	0.989
PGUG_03501	PGUG_04749	1854882	1853556	4929.XP_001484120.1	4929.XP_001482794.1	0	0	0	0	0.194	0.888	0	0.890	0.989
PGUG_02561	PGUG_04321	1855594	1854354	4929.XP_001484832.1	4929.XP_001483592.1	0.058	0	0	0	0.221	0.257	0.900	0.831	0.989
PGUG_00926	PGUG_00716	1858311	1858101	4929.XP_001487549.1	4929.XP_001487339.1	0.219	0	0	0	0.737	0	0.800	0.778	0.989
SPB1	DBP10	1854816	1854247	4929.XP_001484054.1	4929.XP_001483485.1	0	0	0	0	0.976	0.273	0	0.444	0.989
PGUG_01171	EFT2	1858556	1855945	4929.XP_001487794.1	4929.XP_001485183.1	0.054	0	0	0	0.929	0.820	0	0.217	0.989
PGUG_02731	PGUG_02525	1855764	1855558	4929.XP_001485002.1	4929.XP_001484796.1	0.084	0	0	0	0.129	0	0.900	0.880	0.989
PGUG_01615	PGUG_04321	1856706	1854354	4929.XP_001485944.1	4929.XP_001483592.1	0	0	0.480	0.830	0.737	0.527	0.900	0.810	0.989
PGUG_03069	NTE1	1856102	1855687	4929.XP_001485340.1	4929.XP_001484925.1	0.056	0	0	0	0.116	0.085	0.900	0.887	0.989
PGUG_02000	PGUG_03172	1857092	1856205	4929.XP_001486330.1	4929.XP_001485443.1	0	0	0	0	0.126	0	0.900	0.888	0.989
PGUG_00936	PGUG_00779	1858321	1858164	4929.XP_001487559.1	4929.XP_001487402.1	0	0	0	0	0.523	0.884	0	0.820	0.989
PGUG_00716	PGUG_04391	1858101	1854424	4929.XP_001487339.1	4929.XP_001483662.1	0.176	0	0	0	0.684	0.098	0.900	0.606	0.989
DRS1	SPB1	1855295	1854816	4929.XP_001484533.1	4929.XP_001484054.1	0	0	0	0	0.967	0.701	0	0.050	0.989
PGUG_00363	PGUG_05491	1857748	1853233	4929.XP_001486986.1	4929.XP_001482471.1	0	0	0	0	0.903	0.893	0	0.077	0.989
PGUG_01109	PGUG_04670	1858494	1853477	4929.XP_001487732.1	4929.XP_001482715.1	0	0	0	0	0.740	0.676	0	0.887	0.989
PGUG_00420	PGUG_01621	1857805	1856712	4929.XP_001487043.1	4929.XP_001485950.1	0	0	0	0	0.171	0.954	0	0.731	0.988
PGUG_03797	PGUG_05428	1855179	1853170	4929.XP_001484417.1	4929.XP_001482408.1	0.056	0	0	0	0	0	0.900	0.890	0.988
PGUG_01615	PGUG_01403	1856706	1856494	4929.XP_001485944.1	4929.XP_001485732.1	0	0	0.480	0.834	0.736	0.501	0.900	0.709	0.988
PGUG_00237	PGUG_05787	1857622	1852786	4929.XP_001486860.1	4929.XP_001482024.1	0	0	0	0	0.681	0.766	0	0.861	0.988
PGUG_03808	PGUG_04807	1855189	1853614	4929.XP_001484427.1	4929.XP_001482852.1	0	0	0	0	0.689	0.156	0.900	0.607	0.988
PGUG_01988	PGUG_02450	1857079	1855483	4929.XP_001486317.1	4929.XP_001484721.1	0	0	0	0	0.731	0.668	0	0.885	0.988
PGUG_04324	PGUG_05290	1854357	1853032	4929.XP_001483595.1	4929.XP_001482270.1	0	0	0	0	0.737	0.893	0	0.635	0.988
PGUG_03627	PGUG_04349	1855008	1854382	4929.XP_001484246.1	4929.XP_001483620.1	0	0	0.331	0.655	0.929	0.763	0	0.875	0.988
PGUG_03876	PGUG_03875	1855257	1855256	4929.XP_001484495.1	4929.XP_001484494.1	0	0.897	0.476	0	0	0	0.800	0	0.988
EFT2	PGUG_03816	1855945	1855197	4929.XP_001485183.1	4929.XP_001484435.1	0.048	0	0	0	0.929	0.832	0	0.141	0.988
PGUG_00055	PGUG_02118	1857440	1857209	4929.XP_001486678.1	4929.XP_001486447.1	0	0	0	0	0.611	0.124	0.900	0.707	0.988
PGUG_02059	PGUG_03110	1857150	1856143	4929.XP_001486388.1	4929.XP_001485381.1	0	0	0	0	0.615	0.870	0	0.784	0.988
PGUG_01327	PGUG_05746	1856418	1852745	4929.XP_001485656.1	4929.XP_001481983.1	0	0	0	0	0.737	0.893	0	0.627	0.988
PGUG_00926	PGUG_04679	1858311	1853486	4929.XP_001487549.1	4929.XP_001482724.1	0.176	0	0	0	0.650	0.135	0.900	0.605	0.988
PGUG_01967	PGUG_03627	1857058	1855008	4929.XP_001486296.1	4929.XP_001484246.1	0	0	0.320	0.678	0.929	0.768	0	0.856	0.988
PGUG_01867	PGUG_05333	1856958	1853075	4929.XP_001486196.1	4929.XP_001482313.1	0.185	0	0	0	0.407	0	0.900	0.799	0.988
PGUG_01430	PGUG_03043	1856521	1856076	4929.XP_001485759.1	4929.XP_001485314.1	0.054	0	0	0	0.737	0.659	0	0.885	0.988
PGUG_00814	PGUG_05006	1858199	1853813	4929.XP_001487437.1	4929.XP_001483051.1	0	0	0	0	0.988	0	0	0	0.988
PGUG_00414	PGUG_01895	1857799	1856986	4929.XP_001487037.1	4929.XP_001486224.1	0.064	0.301	0	0	0.192	0.825	0	0.892	0.988
PGUG_03627	PGUG_04109	1855008	1854142	4929.XP_001484246.1	4929.XP_001483380.1	0	0	0.425	0.743	0.929	0.768	0	0.881	0.988
PGUG_00981	PGUG_05787	1858366	1852786	4929.XP_001487604.1	4929.XP_001482024.1	0	0	0	0	0.737	0.813	0	0.783	0.988
PGUG_02052	PGUG_03068	1857143	1856101	4929.XP_001486381.1	4929.XP_001485339.1	0	0	0	0	0.092	0.128	0.900	0.874	0.988
PGUG_01083	PGUG_03730	1858468	1855111	4929.XP_001487706.1	4929.XP_001484349.1	0.066	0	0	0	0.055	0	0.900	0.886	0.988
PGUG_02025	PGUG_05017	1857116	1853824	4929.XP_001486354.1	4929.XP_001483062.1	0	0	0	0	0.960	0.252	0	0.637	0.988
PGUG_03808	PGUG_05024	1855189	1853831	4929.XP_001484427.1	4929.XP_001483069.1	0	0	0	0	0.689	0.156	0.900	0.607	0.988
PGUG_01677	PGUG_04828	1856768	1853635	4929.XP_001486006.1	4929.XP_001482873.1	0.327	0	0.389	0	0.737	0.174	0	0.892	0.988
PGUG_01327	PGUG_03162	1856418	1856195	4929.XP_001485656.1	4929.XP_001485433.1	0	0	0	0	0.107	0.893	0	0.889	0.988
PGUG_01467	PGUG_02383	1856558	1855416	4929.XP_001485796.1	4929.XP_001484654.1	0.162	0	0	0	0.333	0	0.900	0.825	0.988
PGUG_00926	PGUG_00294	1858311	1857679	4929.XP_001487549.1	4929.XP_001486917.1	0.219	0	0	0	0.212	0.069	0.900	0.818	0.987
PGUG_05033	PGUG_05844	1853840	1852843	4929.XP_001483078.1	4929.XP_001482081.1	0	0	0	0	0.043	0.500	0.800	0.883	0.987
PGUG_01403	PGUG_02561	1856494	1855594	4929.XP_001485732.1	4929.XP_001484832.1	0.058	0	0	0	0.503	0.151	0.900	0.739	0.987
PGUG_00476	PGUG_01763	1857861	1856854	4929.XP_001487099.1	4929.XP_001486092.1	0.429	0	0	0	0.053	0	0.900	0.802	0.987
DRS1	PGUG_05099	1855295	1853906	4929.XP_001484533.1	4929.XP_001483144.1	0	0	0	0	0.955	0.724	0	0.049	0.987
PGUG_00648	PGUG_00202	1858033	1857587	4929.XP_001487271.1	4929.XP_001486825.1	0	0	0	0	0.603	0.750	0	0.888	0.987
PGUG_04399	PGUG_04349	1854432	1854382	4929.XP_001483670.1	4929.XP_001483620.1	0	0	0.418	0.722	0.929	0.764	0	0.784	0.987
EFT2	PGUG_04375	1855945	1854408	4929.XP_001485183.1	4929.XP_001483646.1	0	0	0	0	0.916	0.816	0	0.271	0.987
PGUG_04266	PGUG_05866	1854300	1852865	4929.XP_001483538.1	4929.XP_001482103.1	0	0	0	0	0.045	0.501	0.900	0.773	0.987
PGUG_00508	PGUG_05462	1857893	1853204	4929.XP_001487131.1	4929.XP_001482442.1	0	0	0	0	0.138	0.954	0	0.708	0.987
PGUG_00188	BNA5	1857573	1854425	4929.XP_001486811.1	4929.XP_001483663.1	0	0	0	0	0.096	0.044	0.900	0.874	0.987
PGUG_04080	PGUG_05465	1854113	1853207	4929.XP_001483351.1	4929.XP_001482445.1	0.176	0	0	0	0.603	0.132	0.900	0.627	0.987
PGUG_01327	PGUG_03596	1856418	1854977	4929.XP_001485656.1	4929.XP_001484215.1	0	0	0	0	0.757	0.880	0	0.603	0.987
RKI1	PGUG_01282	1857118	1856373	4929.XP_001486356.1	4929.XP_001485611.1	0.176	0	0	0	0.097	0.133	0.900	0.825	0.986
PGUG_00924	PGUG_00779	1858309	1858164	4929.XP_001487547.1	4929.XP_001487402.1	0	0	0	0	0.252	0.870	0	0.876	0.986
URE2	PGUG_03331	1856536	1854712	4929.XP_001485774.1	4929.XP_001483950.1	0	0	0	0	0.107	0	0.900	0.856	0.986
PGUG_01327	PGUG_04079	1856418	1854112	4929.XP_001485656.1	4929.XP_001483350.1	0	0	0	0	0.751	0.893	0	0.550	0.986
UTR4	ADI1	1856196	1855353	4929.XP_001485434.1	4929.XP_001484591.1	0.219	0	0.308	0	0.054	0	0.900	0.778	0.986
PGUG_00031	PGUG_03307	1857416	1854688	4929.XP_001486654.1	4929.XP_001483926.1	0	0	0	0	0.737	0.807	0	0.763	0.986
PGUG_01695	PGUG_01426	1856786	1856517	4929.XP_001486024.1	4929.XP_001485755.1	0.176	0	0	0	0.241	0	0.900	0.807	0.986
PGUG_02279	PGUG_04571	1857370	1854604	4929.XP_001486608.1	4929.XP_001483842.1	0	0	0	0	0.099	0.731	0.800	0.747	0.986
PGUG_04403	PGUG_05410	1854436	1853152	4929.XP_001483674.1	4929.XP_001482390.1	0	0	0	0	0.235	0.665	0.600	0.882	0.986
PGUG_03317	PGUG_05419	1854698	1853161	4929.XP_001483936.1	4929.XP_001482399.1	0	0	0	0	0.098	0.740	0.800	0.748	0.986
PGUG_02025	DRS1	1857116	1855295	4929.XP_001486354.1	4929.XP_001484533.1	0	0	0	0	0.947	0.142	0	0.731	0.986
PGUG_01095	PGUG_04243	1858480	1854276	4929.XP_001487718.1	4929.XP_001483514.1	0.219	0	0.432	0	0.736	0.121	0	0.891	0.986
PGUG_04403	PGUG_04673	1854436	1853480	4929.XP_001483674.1	4929.XP_001482718.1	0	0	0	0	0.122	0.712	0.600	0.879	0.986
PGUG_01891	EFT2	1856982	1855945	4929.XP_001486220.1	4929.XP_001485183.1	0.065	0	0	0	0.922	0.814	0	0.101	0.986
PGUG_02062	PGUG_04670	1857153	1853477	4929.XP_001486391.1	4929.XP_001482715.1	0	0	0	0	0.058	0.893	0	0.879	0.986
PGUG_00924	PGUG_00435	1858309	1857820	4929.XP_001487547.1	4929.XP_001487058.1	0	0	0	0	0.195	0.870	0	0.885	0.986
PGUG_05017	PGUG_05282	1853824	1853024	4929.XP_001483062.1	4929.XP_001482262.1	0	0	0	0	0.966	0.114	0	0.602	0.986
PGUG_00926	PGUG_02134	1858311	1857225	4929.XP_001487549.1	4929.XP_001486463.1	0.212	0	0	0	0.133	0	0.900	0.832	0.986
PGUG_00476	PGUG_02400	1857861	1855434	4929.XP_001487099.1	4929.XP_001484672.1	0.219	0	0	0	0.043	0.067	0.900	0.837	0.986
PGUG_02951	PGUG_03317	1855984	1854698	4929.XP_001485222.1	4929.XP_001483936.1	0	0	0	0	0.110	0.757	0.800	0.731	0.986
EFT2	PGUG_04739	1855945	1853546	4929.XP_001485183.1	4929.XP_001482784.1	0	0	0	0	0.928	0.805	0	0.065	0.985
PGUG_02057	PGUG_01430	1857148	1856521	4929.XP_001486386.1	4929.XP_001485759.1	0.088	0	0	0.541	0.926	0.673	0	0.864	0.985
PGUG_00379	PGUG_02089	1857765	1857180	4929.XP_001487003.1	4929.XP_001486418.1	0	0	0	0	0.846	0.893	0	0.218	0.985
PGUG_00926	PGUG_01282	1858311	1856373	4929.XP_001487549.1	4929.XP_001485611.1	0.176	0	0	0	0.119	0.117	0.900	0.806	0.985
PGUG_02603	PGUG_03817	1855636	1855198	4929.XP_001484874.1	4929.XP_001484436.1	0.085	0	0	0	0.685	0.121	0.900	0.527	0.985
PGUG_00961	PGUG_04079	1858346	1854112	4929.XP_001487584.1	4929.XP_001483350.1	0	0	0.414	0.815	0.838	0.893	0	0.785	0.985
PGUG_00102	PGUG_04804	1857487	1853611	4929.XP_001486725.1	4929.XP_001482849.1	0.098	0	0	0	0.052	0.209	0.900	0.824	0.985
PGUG_01084	PGUG_00565	1858469	1857950	4929.XP_001487707.1	4929.XP_001487188.1	0	0	0	0	0.723	0.762	0	0.791	0.985
PGUG_00756	PGUG_04079	1858141	1854112	4929.XP_001487379.1	4929.XP_001483350.1	0	0	0	0	0.661	0.858	0	0.731	0.985
PGUG_01403	PGUG_04321	1856494	1854354	4929.XP_001485732.1	4929.XP_001483592.1	0	0	0.479	0.719	0.603	0.501	0.900	0.886	0.985
PGUG_05080	PGUG_04670	1853887	1853477	4929.XP_001483125.1	4929.XP_001482715.1	0	0	0	0	0.726	0.720	0	0.823	0.985
PGUG_01497	PGUG_01390	1856588	1856481	4929.XP_001485826.1	4929.XP_001485719.1	0.219	0.685	0.268	0	0.603	0.260	0	0.782	0.985
PGUG_01615	PGUG_02561	1856706	1855594	4929.XP_001485944.1	4929.XP_001484832.1	0.058	0	0	0	0.837	0.257	0	0.887	0.985
PGUG_03074	PGUG_04041	1856107	1854074	4929.XP_001485345.1	4929.XP_001483312.1	0.219	0	0	0	0.748	0.449	0	0.870	0.984
PGUG_02272	PGUG_03003	1857363	1856036	4929.XP_001486601.1	4929.XP_001485274.1	0.219	0	0	0	0.208	0	0.900	0.779	0.984
DHH1	PGUG_05489	1856174	1853231	4929.XP_001485412.1	4929.XP_001482469.1	0	0	0	0	0.668	0.608	0	0.890	0.984
PGUG_00240	PGUG_04828	1857625	1853635	4929.XP_001486863.1	4929.XP_001482873.1	0	0	0	0	0.931	0	0	0.791	0.984
PGUG_03307	PGUG_05474	1854688	1853216	4929.XP_001483926.1	4929.XP_001482454.1	0	0	0	0	0.737	0.801	0	0.731	0.984
PGUG_05422	PGUG_05919	1853164	1852673	4929.XP_001482402.1	4929.XP_001481911.1	0	0	0	0	0	0.810	0.800	0.632	0.984
PGUG_03472	PGUG_03452	1854853	1854833	4929.XP_001484091.1	4929.XP_001484071.1	0	0	0	0	0.097	0.141	0.900	0.822	0.984
PGUG_00981	PGUG_00296	1858366	1857681	4929.XP_001487604.1	4929.XP_001486919.1	0	0	0	0	0.201	0.845	0	0.886	0.984
PGUG_01239	PGUG_03973	1856330	1854006	4929.XP_001485568.1	4929.XP_001483244.1	0.189	0	0	0	0.838	0	0	0.891	0.984
PGUG_00569	PGUG_01311	1857954	1856402	4929.XP_001487192.1	4929.XP_001485640.1	0	0	0	0	0.053	0.893	0	0.863	0.984
PGUG_03057	PGUG_03301	1856090	1854682	4929.XP_001485328.1	4929.XP_001483920.1	0.219	0	0	0	0.838	0	0	0.886	0.984
EFT2	PGUG_02744	1855945	1855777	4929.XP_001485183.1	4929.XP_001485015.1	0.054	0	0	0	0.916	0.816	0	0.045	0.984
PGUG_02603	PGUG_04024	1855636	1854057	4929.XP_001484874.1	4929.XP_001483295.1	0.161	0	0	0	0.052	0	0.900	0.825	0.984
DRS1	DBP10	1855295	1854247	4929.XP_001484533.1	4929.XP_001483485.1	0	0	0.475	0.700	0.972	0.280	0	0.449	0.984
PGUG_02291	PGUG_05501	1857382	1853243	4929.XP_001486620.1	4929.XP_001482481.1	0	0	0	0	0.951	0.701	0	0	0.984
PGUG_00485	PGUG_04403	1857870	1854436	4929.XP_001487108.1	4929.XP_001483674.1	0	0	0	0	0.175	0.665	0.600	0.878	0.984
PGUG_03123	PGUG_03817	1856156	1855198	4929.XP_001485394.1	4929.XP_001484436.1	0.219	0	0.449	0	0.828	0.139	0	0.775	0.983
PGUG_00979	PGUG_01327	1858364	1856418	4929.XP_001487602.1	4929.XP_001485656.1	0	0	0	0	0.680	0.893	0	0.554	0.983
PGUG_01239	PGUG_03757	1856330	1855138	4929.XP_001485568.1	4929.XP_001484376.1	0.054	0	0	0	0.043	0	0.900	0.843	0.983
PGUG_04068	PGUG_05623	1854101	1853365	4929.XP_001483339.1	4929.XP_001482603.1	0.162	0	0.213	0	0.058	0	0.900	0.780	0.983
RKI1	RBK1	1857118	1855802	4929.XP_001486356.1	4929.XP_001485040.1	0.162	0.420	0	0	0.043	0	0.900	0.708	0.983
PGUG_01390	PGUG_05560	1856481	1853302	4929.XP_001485719.1	4929.XP_001482540.1	0.219	0	0	0	0.099	0	0.900	0.793	0.983
PGUG_02119	PGUG_05746	1857210	1852745	4929.XP_001486448.1	4929.XP_001481983.1	0	0	0	0	0.737	0.893	0	0.449	0.983
PGUG_03123	PGUG_02305	1856156	1855338	4929.XP_001485394.1	4929.XP_001484576.1	0.176	0.588	0	0	0.744	0.268	0	0.784	0.983
PGUG_00961	PGUG_03596	1858346	1854977	4929.XP_001487584.1	4929.XP_001484215.1	0	0	0	0	0.741	0.852	0	0.605	0.983
PGUG_00565	PGUG_05463	1857950	1853205	4929.XP_001487188.1	4929.XP_001482443.1	0.219	0	0.456	0	0.222	0.807	0	0.780	0.983
PGUG_05024	PGUG_05240	1853831	1852982	4929.XP_001483069.1	4929.XP_001482220.1	0	0	0	0	0.736	0.157	0.800	0.673	0.983
PGUG_02119	PGUG_02732	1857210	1855765	4929.XP_001486448.1	4929.XP_001485003.1	0	0	0	0	0.684	0.814	0	0.736	0.983
PGUG_01600	PGUG_05282	1856691	1853024	4929.XP_001485929.1	4929.XP_001482262.1	0	0	0	0	0.843	0.743	0	0.623	0.983
PGUG_04807	PGUG_05240	1853614	1852982	4929.XP_001482852.1	4929.XP_001482220.1	0	0	0	0	0.736	0.157	0.800	0.673	0.983
PGUG_00435	PGUG_03239	1857820	1856272	4929.XP_001487058.1	4929.XP_001485510.1	0	0	0	0	0.207	0.893	0	0.810	0.982
PGUG_02119	PGUG_04520	1857210	1854553	4929.XP_001486448.1	4929.XP_001483791.1	0	0	0	0	0.723	0.893	0	0.468	0.982
PGUG_01763	PGUG_01505	1856854	1856596	4929.XP_001486092.1	4929.XP_001485834.1	0.448	0	0	0	0.737	0	0	0.892	0.982
PGUG_01465	EFT2	1856556	1855945	4929.XP_001485794.1	4929.XP_001485183.1	0.065	0	0.285	0	0.865	0.815	0	0.101	0.982
PGUG_05363	PGUG_05726	1853105	1852725	4929.XP_001482343.1	4929.XP_001481963.1	0.089	0	0	0	0.206	0.069	0.900	0.784	0.982
PGUG_02309	MET3	1855342	1853890	4929.XP_001484580.1	4929.XP_001483128.1	0.162	0.376	0	0	0.727	0	0	0.891	0.982
PGUG_02126	PAB1	1857217	1854355	4929.XP_001486455.1	4929.XP_001483593.1	0	0	0	0	0.160	0.893	0	0.820	0.982
PGUG_02057	PGUG_03043	1857148	1856076	4929.XP_001486386.1	4929.XP_001485314.1	0	0	0	0	0.688	0.752	0	0.793	0.982
PGUG_00406	PGUG_01895	1857791	1856986	4929.XP_001487029.1	4929.XP_001486224.1	0.064	0.092	0	0	0.214	0.823	0	0.876	0.982
PGUG_00294	PGUG_03973	1857679	1854006	4929.XP_001486917.1	4929.XP_001483244.1	0.217	0	0	0	0.096	0	0.900	0.784	0.982
PGUG_00926	PGUG_02601	1858311	1855634	4929.XP_001487549.1	4929.XP_001484872.1	0	0	0	0	0.237	0	0.900	0.787	0.982
PGUG_03724	PGUG_04072	1855105	1854105	4929.XP_001484343.1	4929.XP_001483343.1	0.162	0.177	0.400	0	0.133	0	0.900	0.605	0.982
PGUG_00978	GET3	1858363	1855455	4929.XP_001487601.1	4929.XP_001484693.1	0	0	0	0	0.078	0.841	0	0.892	0.982
PGUG_04538	PGUG_05746	1854571	1852745	4929.XP_001483809.1	4929.XP_001481983.1	0	0	0	0	0.737	0.893	0	0.443	0.982
PGUG_02731	PGUG_04657	1855764	1853464	4929.XP_001485002.1	4929.XP_001482702.1	0.208	0	0	0	0.081	0.459	0.900	0.628	0.982
PGUG_00918	PGUG_01867	1858303	1856958	4929.XP_001487541.1	4929.XP_001486196.1	0.052	0	0	0	0.075	0	0.900	0.827	0.982
PGUG_00565	PGUG_01723	1857950	1856814	4929.XP_001487188.1	4929.XP_001486052.1	0	0	0	0	0.608	0.814	0	0.780	0.982
PGUG_02057	PGUG_05518	1857148	1853260	4929.XP_001486386.1	4929.XP_001482498.1	0	0	0	0	0.837	0.539	0	0.779	0.981
PGUG_03730	PGUG_05294	1855111	1853036	4929.XP_001484349.1	4929.XP_001482274.1	0	0	0	0	0.122	0.171	0.900	0.780	0.981
PGUG_02119	PGUG_04817	1857210	1853624	4929.XP_001486448.1	4929.XP_001482862.1	0	0	0	0	0.593	0.812	0	0.779	0.981
PGUG_00648	PGUG_02542	1858033	1855575	4929.XP_001487271.1	4929.XP_001484813.1	0	0.373	0	0	0.113	0.733	0	0.891	0.981
PGUG_02617	PGUG_05474	1855650	1853216	4929.XP_001484888.1	4929.XP_001482454.1	0	0	0	0	0	0.954	0	0.607	0.981
PGUG_00414	PGUG_02057	1857799	1857148	4929.XP_001487037.1	4929.XP_001486386.1	0.054	0	0	0	0.737	0.706	0	0.778	0.981
PGUG_04239	PGUG_04759	1854272	1853566	4929.XP_001483510.1	4929.XP_001482804.1	0.176	0	0	0	0.213	0	0.900	0.755	0.981
PGUG_00164	PGUG_04946	1857549	1853753	4929.XP_001486787.1	4929.XP_001482991.1	0.165	0	0	0	0	0	0.900	0.794	0.981
PGUG_02584	PGUG_05074	1855617	1853881	4929.XP_001484855.1	4929.XP_001483119.1	0	0	0	0	0.297	0.888	0	0.780	0.981
PGUG_01002	PGUG_04713	1858387	1853520	4929.XP_001487625.1	4929.XP_001482758.1	0	0	0.391	0	0.051	0	0.900	0.713	0.981
PGUG_00981	PGUG_00237	1858366	1857622	4929.XP_001487604.1	4929.XP_001486860.1	0	0	0	0	0.664	0.768	0	0.786	0.981
PGUG_00485	PGUG_00365	1857870	1857750	4929.XP_001487108.1	4929.XP_001486988.1	0	0	0	0	0.236	0.667	0.600	0.837	0.981
PGUG_00390	PGUG_04266	1857775	1854300	4929.XP_001487013.1	4929.XP_001483538.1	0	0	0	0	0.242	0	0.900	0.780	0.981
PGUG_01277	PGUG_03033	1856368	1856066	4929.XP_001485606.1	4929.XP_001485304.1	0	0	0	0	0.173	0.807	0	0.892	0.981
PGUG_04266	PGUG_05863	1854300	1852862	4929.XP_001483538.1	4929.XP_001482100.1	0.176	0	0	0	0.116	0	0.900	0.779	0.981
PGUG_01405	PGUG_01282	1856496	1856373	4929.XP_001485734.1	4929.XP_001485611.1	0.173	0	0	0	0.058	0.124	0.800	0.887	0.981
PGUG_02025	PGUG_05282	1857116	1853024	4929.XP_001486354.1	4929.XP_001482262.1	0.047	0	0	0	0.967	0.114	0	0.426	0.981
PGUG_02879	PGUG_04230	1855912	1854263	4929.XP_001485150.1	4929.XP_001483501.1	0.052	0	0	0	0.045	0.883	0	0.842	0.981
PGUG_02732	PGUG_04960	1855765	1853767	4929.XP_001485003.1	4929.XP_001483005.1	0	0	0	0	0.691	0.812	0	0.714	0.981
PGUG_00712	PGUG_03483	1858097	1854864	4929.XP_001487335.1	4929.XP_001484102.1	0	0	0	0	0.102	0.830	0	0.889	0.981
PGUG_00965	PGUG_00926	1858350	1858311	4929.XP_001487588.1	4929.XP_001487549.1	0	0	0	0	0.171	0	0.900	0.797	0.981
PGUG_00951	PGUG_05363	1858336	1853105	4929.XP_001487574.1	4929.XP_001482343.1	0.053	0	0	0	0.047	0.140	0.900	0.801	0.981
PGUG_02674	PGUG_04946	1855707	1853753	4929.XP_001484945.1	4929.XP_001482991.1	0.200	0	0	0	0.170	0	0.900	0.744	0.980
PGUG_03724	PGUG_03564	1855105	1854945	4929.XP_001484343.1	4929.XP_001484183.1	0.162	0.061	0.367	0	0.133	0	0.900	0.633	0.980
PGUG_01600	PGUG_05099	1856691	1853906	4929.XP_001485929.1	4929.XP_001483144.1	0	0	0	0	0.960	0.533	0	0	0.980
PGUG_03470	PGUG_03389	1854851	1854770	4929.XP_001484089.1	4929.XP_001484008.1	0	0	0	0	0.842	0.263	0	0.843	0.980
PGUG_02279	LOS1	1857370	1854209	4929.XP_001486608.1	4929.XP_001483447.1	0	0	0	0	0.172	0.663	0.800	0.690	0.980
PGUG_00939	ADK1	1858324	1858262	4929.XP_001487562.1	4929.XP_001487500.1	0.047	0	0	0	0.172	0	0.900	0.780	0.980
PGUG_00752	PGUG_04946	1858137	1853753	4929.XP_001487375.1	4929.XP_001482991.1	0	0	0	0	0.093	0.121	0.900	0.780	0.980
PGUG_01172	PGUG_02134	1858557	1857225	4929.XP_001487795.1	4929.XP_001486463.1	0.044	0	0	0	0.114	0	0.900	0.793	0.980
PGUG_00294	PGUG_01405	1857679	1856496	4929.XP_001486917.1	4929.XP_001485734.1	0.163	0	0	0	0.114	0	0.800	0.886	0.980
PGUG_01505	PGUG_05631	1856596	1853373	4929.XP_001485834.1	4929.XP_001482611.1	0.336	0	0	0	0.085	0	0.900	0.712	0.980
PGUG_02057	PGUG_05630	1857148	1853372	4929.XP_001486386.1	4929.XP_001482610.1	0	0	0	0	0.736	0.703	0	0.771	0.980
PGUG_00406	PGUG_02057	1857791	1857148	4929.XP_001487029.1	4929.XP_001486386.1	0.054	0	0	0	0.674	0.745	0	0.779	0.980
PGUG_00399	PGUG_03144	1857784	1856177	4929.XP_001487022.1	4929.XP_001485415.1	0	0	0	0	0.046	0.209	0.800	0.888	0.980
MDE1	ADI1	1855893	1855353	4929.XP_001485131.1	4929.XP_001484591.1	0.098	0.625	0.466	0	0.095	0	0	0.892	0.979
PGUG_04670	PGUG_05565	1853477	1853307	4929.XP_001482715.1	4929.XP_001482545.1	0	0	0	0	0.737	0.664	0	0.782	0.979
PGUG_00716	PGUG_01239	1858101	1856330	4929.XP_001487339.1	4929.XP_001485568.1	0.076	0	0	0	0.054	0	0.900	0.797	0.979
PGUG_02101	PGUG_01379	1857192	1856470	4929.XP_001486430.1	4929.XP_001485708.1	0.095	0	0	0	0.123	0	0.800	0.886	0.979
PGUG_01110	PGUG_02686	1858495	1855719	4929.XP_001487733.1	4929.XP_001484957.1	0	0	0	0	0.173	0.727	0.800	0.607	0.979
PGUG_00756	PGUG_03596	1858141	1854977	4929.XP_001487379.1	4929.XP_001484215.1	0	0	0	0	0.737	0.840	0	0.550	0.979
PGUG_00406	PGUG_01430	1857791	1856521	4929.XP_001487029.1	4929.XP_001485759.1	0.047	0.010	0	0	0.736	0.669	0	0.780	0.979
PGUG_00307	PGUG_01239	1857692	1856330	4929.XP_001486930.1	4929.XP_001485568.1	0.064	0	0	0	0.122	0	0.900	0.778	0.979
PGUG_00926	PGUG_04391	1858311	1854424	4929.XP_001487549.1	4929.XP_001483662.1	0.175	0	0	0	0.702	0.113	0.800	0.606	0.979
PGUG_01327	PGUG_04520	1856418	1854553	4929.XP_001485656.1	4929.XP_001483791.1	0	0	0	0	0.741	0.893	0	0.310	0.979
PGUG_02119	PGUG_03596	1857210	1854977	4929.XP_001486448.1	4929.XP_001484215.1	0	0	0	0	0.746	0.840	0	0.544	0.979
SEC13	SAR1	1855723	1852782	4929.XP_001484961.1	4929.XP_001482020.1	0	0	0	0	0.136	0.066	0.800	0.886	0.979
PGUG_02309	PGUG_03541	1855342	1854922	4929.XP_001484580.1	4929.XP_001484160.1	0.162	0	0	0	0.230	0.067	0.900	0.709	0.979
EFT2	PGUG_02658	1855945	1855691	4929.XP_001485183.1	4929.XP_001484929.1	0.065	0	0	0	0.843	0.832	0	0.281	0.979
PGUG_01877	PGUG_05410	1856967	1853152	4929.XP_001486205.1	4929.XP_001482390.1	0	0	0	0	0.737	0.885	0	0.370	0.979
PGUG_00899	TIF1	1858284	1857938	4929.XP_001487522.1	4929.XP_001487176.1	0	0	0	0	0.421	0.270	0.800	0.782	0.979
PGUG_03411	ACT1	1854792	1853342	4929.XP_001484030.1	4929.XP_001482580.1	0	0	0	0	0.103	0.814	0	0.888	0.979
PGUG_00961	PGUG_02119	1858346	1857210	4929.XP_001487584.1	4929.XP_001486448.1	0	0	0	0	0.733	0.811	0	0.620	0.979
PGUG_01600	DRS1	1856691	1855295	4929.XP_001485929.1	4929.XP_001484533.1	0	0	0	0	0.939	0.537	0	0.330	0.979
PGUG_01737	PGUG_02379	1856828	1855412	4929.XP_001486066.1	4929.XP_001484650.1	0	0	0	0	0.093	0.880	0	0.822	0.978
PGUG_02025	PGUG_05006	1857116	1853813	4929.XP_001486354.1	4929.XP_001483051.1	0	0	0	0	0.978	0	0	0	0.978
PGUG_01364	PGUG_05631	1856455	1853373	4929.XP_001485693.1	4929.XP_001482611.1	0.219	0	0	0	0.049	0	0.900	0.740	0.978
PGUG_01083	PGUG_03140	1858468	1856173	4929.XP_001487706.1	4929.XP_001485411.1	0.219	0	0	0	0.063	0	0.900	0.735	0.978
PGUG_01035	PGUG_04828	1858420	1853635	4929.XP_001487658.1	4929.XP_001482873.1	0.062	0	0	0	0	0	0.900	0.787	0.978
PGUG_00307	PGUG_01503	1857692	1856594	4929.XP_001486930.1	4929.XP_001485832.1	0.162	0	0	0	0.313	0.269	0.900	0.561	0.978
PGUG_04088	PGUG_05099	1854121	1853906	4929.XP_001483359.1	4929.XP_001483144.1	0	0	0	0	0.978	0	0	0	0.978
PGUG_00416	PGUG_04244	1857801	1854277	4929.XP_001487039.1	4929.XP_001483515.1	0	0	0	0	0.978	0	0	0.061	0.978
PGUG_04391	PGUG_04807	1854424	1853614	4929.XP_001483662.1	4929.XP_001482852.1	0.079	0	0	0	0.510	0.268	0.900	0.438	0.978
PGUG_04088	PGUG_05282	1854121	1853024	4929.XP_001483359.1	4929.XP_001482262.1	0	0	0	0	0.977	0	0	0.104	0.978
RKI1	PGUG_05084	1857118	1853891	4929.XP_001486356.1	4929.XP_001483129.1	0.184	0	0	0	0.133	0	0.900	0.732	0.978
PGUG_01988	PGUG_04809	1857079	1853616	4929.XP_001486317.1	4929.XP_001482854.1	0	0	0	0	0.094	0.893	0	0.793	0.978
PGUG_04391	PGUG_05024	1854424	1853831	4929.XP_001483662.1	4929.XP_001483069.1	0.079	0	0	0	0.510	0.268	0.900	0.438	0.978
PGUG_03389	PGUG_05080	1854770	1853887	4929.XP_001484008.1	4929.XP_001483125.1	0	0	0	0	0.736	0.308	0	0.892	0.978
PGUG_00307	PGUG_02540	1857692	1855573	4929.XP_001486930.1	4929.XP_001484811.1	0.162	0	0	0	0.313	0.269	0.900	0.561	0.978
RIB5	RIB1	1857891	1854060	4929.XP_001487129.1	4929.XP_001483298.1	0.176	0.739	0.444	0	0.098	0.209	0	0.798	0.978
PGUG_01858	PGUG_03730	1856949	1855111	4929.XP_001486187.1	4929.XP_001484349.1	0	0	0	0	0.046	0	0.900	0.797	0.978
PGUG_00406	PGUG_01408	1857791	1856499	4929.XP_001487029.1	4929.XP_001485737.1	0.089	0	0	0	0.503	0.665	0	0.869	0.977
PGUG_03470	PGUG_04670	1854851	1853477	4929.XP_001484089.1	4929.XP_001482715.1	0.174	0	0	0	0.708	0.257	0	0.888	0.977
PGUG_03772	PGUG_04074	1855153	1854106	4929.XP_001484391.1	4929.XP_001483344.1	0	0	0	0	0.941	0	0	0.642	0.977
PGUG_01005	PGUG_03331	1858390	1854712	4929.XP_001487628.1	4929.XP_001483950.1	0	0	0	0	0.094	0	0.900	0.772	0.977
UTP10	PGUG_05006	1855581	1853813	4929.XP_001484819.1	4929.XP_001483051.1	0	0	0	0	0.964	0	0	0.388	0.977
PGUG_00926	PGUG_03973	1858311	1854006	4929.XP_001487549.1	4929.XP_001483244.1	0	0	0	0	0.054	0	0.900	0.780	0.977
PGUG_01505	PGUG_04828	1856596	1853635	4929.XP_001485834.1	4929.XP_001482873.1	0.448	0	0.318	0	0.487	0.091	0	0.892	0.977
PGUG_01035	PGUG_03057	1858420	1856090	4929.XP_001487658.1	4929.XP_001485328.1	0.082	0	0	0	0.078	0	0.900	0.766	0.977
PGUG_00756	PGUG_05746	1858141	1852745	4929.XP_001487379.1	4929.XP_001481983.1	0	0	0	0	0.684	0.880	0	0.447	0.977
PGUG_04734	PGUG_05419	1853541	1853161	4929.XP_001482779.1	4929.XP_001482399.1	0	0	0	0	0.602	0.703	0	0.828	0.977
PGUG_01282	PGUG_05240	1856373	1852982	4929.XP_001485611.1	4929.XP_001482220.1	0.176	0	0	0	0.051	0	0.900	0.749	0.977
SPB1	PGUG_04088	1854816	1854121	4929.XP_001484054.1	4929.XP_001483359.1	0	0	0	0	0.977	0	0	0	0.977
PGUG_03129	PGUG_04068	1856162	1854101	4929.XP_001485400.1	4929.XP_001483339.1	0.078	0	0	0	0.053	0.260	0.900	0.709	0.977
PGUG_01172	PGUG_03970	1858557	1854003	4929.XP_001487795.1	4929.XP_001483241.1	0.162	0	0	0	0.128	0	0.900	0.731	0.977
PGUG_03842	PGUG_05099	1855223	1853906	4929.XP_001484461.1	4929.XP_001483144.1	0	0	0	0	0.970	0.250	0	0.069	0.977
PGUG_01600	DBP10	1856691	1854247	4929.XP_001485929.1	4929.XP_001483485.1	0	0	0	0	0.971	0.248	0	0.050	0.977
PGUG_03172	PGUG_03555	1856205	1854936	4929.XP_001485443.1	4929.XP_001484174.1	0	0	0	0	0.045	0.069	0.900	0.780	0.977
PGUG_00294	PGUG_05240	1857679	1852982	4929.XP_001486917.1	4929.XP_001482220.1	0.219	0	0	0	0.045	0	0.900	0.731	0.977
PGUG_00716	PGUG_03757	1858101	1855138	4929.XP_001487339.1	4929.XP_001484376.1	0	0	0	0	0.100	0.269	0.900	0.705	0.977
PGUG_00961	PGUG_01327	1858346	1856418	4929.XP_001487584.1	4929.XP_001485656.1	0	0	0	0	0.642	0.880	0	0.519	0.977
PGUG_02085	PGUG_04189	1857176	1854222	4929.XP_001486414.1	4929.XP_001483460.1	0.052	0	0	0	0.064	0	0.900	0.780	0.977
PGUG_00080	PGUG_02603	1857465	1855636	4929.XP_001486703.1	4929.XP_001484874.1	0.042	0	0	0	0	0.257	0.900	0.704	0.976
PGUG_00951	PGUG_05084	1858336	1853891	4929.XP_001487574.1	4929.XP_001483129.1	0.053	0	0	0	0.096	0.092	0.900	0.742	0.976
PGUG_01152	PGUG_02279	1858537	1857370	4929.XP_001487775.1	4929.XP_001486608.1	0	0	0	0	0.210	0.879	0	0.777	0.976
PGUG_01615	PGUG_04266	1856706	1854300	4929.XP_001485944.1	4929.XP_001483538.1	0	0	0	0	0.522	0	0.900	0.542	0.976
PGUG_03430	PGUG_05006	1854811	1853813	4929.XP_001484049.1	4929.XP_001483051.1	0	0	0	0	0.972	0	0	0.193	0.976
PGUG_00294	PGUG_05084	1857679	1853891	4929.XP_001486917.1	4929.XP_001483129.1	0.210	0	0	0	0.737	0.139	0	0.886	0.976
PGUG_03564	PGUG_05084	1854945	1853891	4929.XP_001484183.1	4929.XP_001483129.1	0.162	0	0	0	0.130	0	0.900	0.714	0.976
PGUG_00406	PGUG_03043	1857791	1856076	4929.XP_001487029.1	4929.XP_001485314.1	0.064	0	0	0	0.173	0.757	0	0.889	0.976
PGUG_02579	PGUG_03757	1855612	1855138	4929.XP_001484850.1	4929.XP_001484376.1	0.054	0	0	0	0.085	0.254	0.900	0.697	0.976
PGUG_02603	PGUG_02360	1855636	1855393	4929.XP_001484874.1	4929.XP_001484631.1	0.042	0	0	0	0	0.257	0.900	0.704	0.976
PGUG_02101	PGUG_04713	1857192	1853520	4929.XP_001486430.1	4929.XP_001482758.1	0.095	0	0	0	0.097	0	0.900	0.746	0.976
PGUG_01920	PGUG_05428	1857011	1853170	4929.XP_001486249.1	4929.XP_001482408.1	0	0	0	0	0.045	0.255	0.900	0.709	0.976
ALA1	PGUG_05518	1857608	1853260	4929.XP_001486846.1	4929.XP_001482498.1	0.167	0	0	0	0.584	0.532	0	0.873	0.976
PGUG_02305	PGUG_03817	1855338	1855198	4929.XP_001484576.1	4929.XP_001484436.1	0.176	0	0	0	0.828	0.451	0	0.731	0.976
PGUG_00926	PGUG_02229	1858311	1857320	4929.XP_001487549.1	4929.XP_001486558.1	0.176	0	0	0	0.052	0	0.900	0.731	0.976
PGUG_00961	PGUG_04960	1858346	1853767	4929.XP_001487584.1	4929.XP_001483005.1	0	0	0	0	0.737	0.812	0	0.563	0.976
PGUG_05474	PGUG_05282	1853216	1853024	4929.XP_001482454.1	4929.XP_001482262.1	0	0	0	0	0.737	0.695	0	0.731	0.976
PGUG_00729	PGUG_05245	1858114	1852987	4929.XP_001487352.1	4929.XP_001482225.1	0	0.629	0	0	0.054	0.709	0	0.794	0.976
PGUG_02951	PGUG_03575	1855984	1854956	4929.XP_001485222.1	4929.XP_001484194.1	0	0	0	0	0.080	0.891	0	0.781	0.976
PGUG_02910	PGUG_02805	1855943	1855838	4929.XP_001485181.1	4929.XP_001485076.1	0.052	0	0	0	0.073	0.538	0.900	0.502	0.976
PGUG_01683	PGUG_05518	1856774	1853260	4929.XP_001486012.1	4929.XP_001482498.1	0	0	0	0	0.737	0.542	0	0.818	0.976
ADK1	PGUG_04946	1858262	1853753	4929.XP_001487500.1	4929.XP_001482991.1	0.061	0	0	0	0.053	0	0.900	0.757	0.975
PGUG_03724	PGUG_05084	1855105	1853891	4929.XP_001484343.1	4929.XP_001483129.1	0.219	0	0.410	0	0.624	0.067	0	0.872	0.975
PGUG_02078	PGUG_04681	1857169	1853488	4929.XP_001486407.1	4929.XP_001482726.1	0	0	0	0	0.080	0.120	0.900	0.731	0.975
PGUG_02601	PGUG_05295	1855634	1853037	4929.XP_001484872.1	4929.XP_001482275.1	0	0	0	0	0.239	0	0.900	0.709	0.975
EFT2	PGUG_03619	1855945	1855000	4929.XP_001485183.1	4929.XP_001484238.1	0.065	0	0	0	0.737	0.831	0	0.474	0.975
PGUG_00363	PGUG_01483	1857748	1856574	4929.XP_001486986.1	4929.XP_001485812.1	0	0	0	0	0.776	0.893	0	0	0.975
PGUG_01875	PGUG_03140	1856966	1856173	4929.XP_001486204.1	4929.XP_001485411.1	0.219	0	0.270	0	0.685	0.340	0	0.825	0.975
PGUG_00202	PGUG_02279	1857587	1857370	4929.XP_001486825.1	4929.XP_001486608.1	0	0	0	0	0.143	0.815	0	0.856	0.975
PGUG_01858	PGUG_04244	1856949	1854277	4929.XP_001486187.1	4929.XP_001483515.1	0	0	0	0	0.975	0	0	0	0.975
PGUG_00414	PGUG_03043	1857799	1856076	4929.XP_001487037.1	4929.XP_001485314.1	0.064	0	0	0	0.127	0.755	0	0.892	0.975
PGUG_03808	PGUG_05240	1855189	1852982	4929.XP_001484427.1	4929.XP_001482220.1	0.219	0	0	0	0.736	0.109	0	0.880	0.975
PGUG_04145	PGUG_05015	1854178	1853822	4929.XP_001483416.1	4929.XP_001483060.1	0	0	0	0	0.732	0.269	0	0.879	0.974
PGUG_00691	PGUG_05518	1858075	1853260	4929.XP_001487313.1	4929.XP_001482498.1	0	0	0	0	0.918	0	0	0.698	0.974
PGUG_00035	PGUG_04227	1857420	1854260	4929.XP_001486658.1	4929.XP_001483498.1	0	0	0	0	0.173	0.303	0.900	0.606	0.974
PGUG_00926	PGUG_04596	1858311	1854629	4929.XP_001487549.1	4929.XP_001483867.1	0.176	0	0	0	0.603	0	0.800	0.657	0.974
PGUG_05099	PGUG_05006	1853906	1853813	4929.XP_001483144.1	4929.XP_001483051.1	0	0	0	0	0.972	0	0	0.139	0.974
PGUG_00756	PGUG_04520	1858141	1854553	4929.XP_001487379.1	4929.XP_001483791.1	0	0	0	0	0.725	0.844	0	0.457	0.974
PGUG_00414	PGUG_05629	1857799	1853371	4929.XP_001487037.1	4929.XP_001482609.1	0.053	0	0	0	0.736	0.548	0	0.800	0.974
PGUG_02222	PGUG_01327	1857313	1856418	4929.XP_001486551.1	4929.XP_001485656.1	0	0	0	0	0.131	0.753	0	0.890	0.974
PGUG_01829	PGUG_01327	1856920	1856418	4929.XP_001486158.1	4929.XP_001485656.1	0	0	0	0	0.078	0.882	0	0.787	0.974
PGUG_00361	PGUG_03380	1857746	1854761	4929.XP_001486984.1	4929.XP_001483999.1	0.176	0.294	0	0	0.085	0	0.900	0.600	0.974
PGUG_02025	PGUG_04088	1857116	1854121	4929.XP_001486354.1	4929.XP_001483359.1	0	0	0	0	0.974	0	0	0	0.974
PGUG_04353	PGUG_04687	1854386	1853494	4929.XP_001483624.1	4929.XP_001482732.1	0	0	0.478	0.905	0.742	0.893	0	0.892	0.974
PGUG_01430	PGUG_05630	1856521	1853372	4929.XP_001485759.1	4929.XP_001482610.1	0.048	0	0	0	0.736	0.611	0	0.773	0.974
PGUG_02732	PGUG_04538	1855765	1854571	4929.XP_001485003.1	4929.XP_001483809.1	0	0	0	0	0.244	0.883	0	0.731	0.974
PGUG_00901	PGUG_00666	1858286	1858051	4929.XP_001487524.1	4929.XP_001487289.1	0.184	0	0	0	0.044	0.810	0	0.850	0.974
PGUG_03196	DRE2	1856229	1853181	4929.XP_001485467.1	4929.XP_001482419.1	0	0	0	0	0.043	0.882	0	0.790	0.974
PGUG_03501	PGUG_05134	1854882	1853941	4929.XP_001484120.1	4929.XP_001483179.1	0	0	0	0	0.246	0.857	0	0.779	0.974
PGUG_00926	PGUG_01317	1858311	1856408	4929.XP_001487549.1	4929.XP_001485646.1	0.176	0	0	0	0.603	0	0.800	0.657	0.974
PGUG_02144	PGUG_02450	1857235	1855483	4929.XP_001486473.1	4929.XP_001484721.1	0	0	0	0	0.575	0.729	0	0.793	0.974
PGUG_01109	PGUG_05080	1858494	1853887	4929.XP_001487732.1	4929.XP_001483125.1	0	0	0	0	0.733	0.274	0	0.878	0.974
PGUG_04088	PGUG_05006	1854121	1853813	4929.XP_001483359.1	4929.XP_001483051.1	0	0	0	0	0.974	0	0	0	0.974
KAE1	PGUG_03678	1855833	1855060	4929.XP_001485071.1	4929.XP_001484298.1	0	0	0	0	0.070	0.759	0	0.891	0.973
PGUG_03196	PGUG_03885	1856229	1855266	4929.XP_001485467.1	4929.XP_001484504.1	0.162	0	0	0	0.083	0.764	0	0.870	0.973
PGUG_02184	PGUG_05398	1857275	1853140	4929.XP_001486513.1	4929.XP_001482378.1	0	0	0	0	0.716	0.725	0	0.688	0.973
SPB4	SPB1	1855458	1854816	4929.XP_001484696.1	4929.XP_001484054.1	0	0	0	0	0.948	0.156	0	0.446	0.973
PGUG_01317	PGUG_05240	1856408	1852982	4929.XP_001485646.1	4929.XP_001482220.1	0.176	0	0	0	0.248	0.089	0.900	0.606	0.973
PGUG_01615	PGUG_03470	1856706	1854851	4929.XP_001485944.1	4929.XP_001484089.1	0	0	0	0	0.965	0.255	0	0.063	0.973
PGUG_01282	PGUG_03973	1856373	1854006	4929.XP_001485611.1	4929.XP_001483244.1	0.176	0	0	0	0.059	0	0.900	0.699	0.973
PGUG_01239	PGUG_02540	1856330	1855573	4929.XP_001485568.1	4929.XP_001484811.1	0	0	0	0	0.564	0	0.900	0.450	0.973
PGUG_02074	PGUG_05238	1857165	1852980	4929.XP_001486403.1	4929.XP_001482218.1	0	0	0	0	0.745	0.687	0	0.694	0.973
PGUG_00954	PGUG_04785	1858339	1853592	4929.XP_001487577.1	4929.XP_001482830.1	0	0	0	0	0	0.665	0.800	0.632	0.973
PGUG_04596	PGUG_05240	1854629	1852982	4929.XP_001483867.1	4929.XP_001482220.1	0.176	0	0	0	0.248	0.089	0.900	0.606	0.973
DBP10	PGUG_04088	1854247	1854121	4929.XP_001483485.1	4929.XP_001483359.1	0	0	0	0	0.973	0	0	0	0.973
PGUG_00414	PGUG_05630	1857799	1853372	4929.XP_001487037.1	4929.XP_001482610.1	0.089	0.692	0	0	0.624	0.257	0	0.708	0.973
PGUG_02025	PGUG_05099	1857116	1853906	4929.XP_001486354.1	4929.XP_001483144.1	0	0	0	0	0.971	0.124	0	0	0.973
UTP10	PGUG_05017	1855581	1853824	4929.XP_001484819.1	4929.XP_001483062.1	0	0	0	0	0.972	0	0	0	0.972
PGUG_05630	PGUG_05629	1853372	1853371	4929.XP_001482610.1	4929.XP_001482609.1	0.048	0	0	0	0.737	0.644	0	0.731	0.972
PGUG_04223	PGUG_03984	1854256	1854017	4929.XP_001483494.1	4929.XP_001483255.1	0	0	0	0	0.042	0.042	0.900	0.731	0.972
PGUG_02028	EFT2	1857119	1855945	4929.XP_001486357.1	4929.XP_001485183.1	0	0	0	0	0.808	0.765	0	0.448	0.972
PGUG_00485	PGUG_01877	1857870	1856967	4929.XP_001487108.1	4929.XP_001486205.1	0	0	0	0	0.736	0.893	0	0.113	0.972
DRE2	TAH18	1853181	1852955	4929.XP_001482419.1	4929.XP_001482193.1	0	0	0	0	0.081	0.744	0	0.892	0.972
PGUG_03430	PGUG_05099	1854811	1853906	4929.XP_001484049.1	4929.XP_001483144.1	0	0	0	0	0.940	0.563	0	0	0.972
PGUG_00452	PGUG_05238	1857837	1852980	4929.XP_001487075.1	4929.XP_001482218.1	0	0	0	0	0.928	0.114	0	0.607	0.972
PGUG_02118	PGUG_05294	1857209	1853036	4929.XP_001486447.1	4929.XP_001482274.1	0	0	0	0	0.088	0	0.900	0.720	0.972
PGUG_00414	PGUG_01408	1857799	1856499	4929.XP_001487037.1	4929.XP_001485737.1	0.089	0	0	0	0.584	0.675	0	0.802	0.972
TIF6	PGUG_03430	1854852	1854811	4929.XP_001484090.1	4929.XP_001484049.1	0.162	0	0	0	0.618	0.769	0	0.673	0.972
PGUG_01035	PGUG_04713	1858420	1853520	4929.XP_001487658.1	4929.XP_001482758.1	0.064	0	0	0	0.095	0.088	0.900	0.703	0.972
PGUG_02579	PGUG_05294	1855612	1853036	4929.XP_001484850.1	4929.XP_001482274.1	0	0	0	0	0.307	0.119	0.900	0.606	0.972
PGUG_01483	RPS0	1856574	1855403	4929.XP_001485812.1	4929.XP_001484641.1	0	0	0	0	0.736	0.893	0	0.060	0.971
DBP10	PGUG_05099	1854247	1853906	4929.XP_001483485.1	4929.XP_001483144.1	0	0	0	0	0.965	0.228	0	0	0.971
PGUG_00648	PGUG_02279	1858033	1857370	4929.XP_001487271.1	4929.XP_001486608.1	0	0	0	0	0.082	0.760	0	0.883	0.971
PGUG_01035	PGUG_01379	1858420	1856470	4929.XP_001487658.1	4929.XP_001485708.1	0.064	0	0	0	0.095	0.088	0.800	0.846	0.971
PGUG_04431	ACT1	1854464	1853342	4929.XP_001483702.1	4929.XP_001482580.1	0	0	0	0	0.054	0.741	0	0.892	0.971
PGUG_05099	PGUG_05017	1853906	1853824	4929.XP_001483144.1	4929.XP_001483062.1	0	0	0	0	0.969	0.129	0	0	0.971
PGUG_04538	PGUG_04520	1854571	1854553	4929.XP_001483809.1	4929.XP_001483791.1	0	0	0	0	0.642	0.893	0	0.313	0.971
PGUG_00363	PGUG_05410	1857748	1853152	4929.XP_001486986.1	4929.XP_001482390.1	0	0	0	0	0.736	0.893	0	0.059	0.971
PGUG_04041	PGUG_04946	1854074	1853753	4929.XP_001483312.1	4929.XP_001482991.1	0.207	0	0	0	0.337	0.132	0.900	0.470	0.971
RPS0	PGUG_05410	1855403	1853152	4929.XP_001484641.1	4929.XP_001482390.1	0	0	0	0	0.737	0.893	0	0.058	0.971
PGUG_00565	PGUG_01621	1857950	1856712	4929.XP_001487188.1	4929.XP_001485950.1	0.219	0	0.479	0.592	0.737	0.753	0	0.891	0.971
PGUG_03002	PGUG_03380	1856035	1854761	4929.XP_001485273.1	4929.XP_001483999.1	0.176	0	0	0	0.053	0	0.900	0.678	0.971
PGUG_02144	PGUG_01988	1857235	1857079	4929.XP_001486473.1	4929.XP_001486317.1	0	0	0	0	0.603	0.750	0	0.730	0.970
PGUG_03817	PGUG_04085	1855198	1854118	4929.XP_001484436.1	4929.XP_001483356.1	0.176	0	0	0	0.196	0	0.900	0.606	0.970
PGUG_00485	PGUG_00363	1857870	1857748	4929.XP_001487108.1	4929.XP_001486986.1	0	0	0	0	0.737	0.893	0	0	0.970
PGUG_00503	PGUG_04067	1857888	1854100	4929.XP_001487126.1	4929.XP_001483338.1	0.176	0	0	0	0.716	0.724	0	0.594	0.970
PGUG_04520	PGUG_04960	1854553	1853767	4929.XP_001483791.1	4929.XP_001483005.1	0	0	0	0	0.737	0.815	0	0.448	0.970
PGUG_04828	PGUG_04759	1853635	1853566	4929.XP_001482873.1	4929.XP_001482804.1	0	0	0	0	0.737	0	0	0.892	0.970
PGUG_00048	PGUG_05474	1857433	1853216	4929.XP_001486671.1	4929.XP_001482454.1	0	0	0	0	0.648	0.740	0	0.705	0.970
PGUG_03480	PGUG_04828	1854861	1853635	4929.XP_001484099.1	4929.XP_001482873.1	0.429	0	0	0	0.547	0.066	0	0.892	0.970
DRS1	PGUG_05282	1855295	1853024	4929.XP_001484533.1	4929.XP_001482262.1	0	0	0	0	0.961	0.250	0	0.069	0.970
PGUG_05358	PGUG_05295	1853100	1853037	4929.XP_001482338.1	4929.XP_001482275.1	0	0	0	0	0.559	0	0.900	0.380	0.970
PGUG_02893	PGUG_02718	1855926	1855751	4929.XP_001485164.1	4929.XP_001484989.1	0	0	0	0	0	0	0.800	0.856	0.969
SPB1	PGUG_05282	1854816	1853024	4929.XP_001484054.1	4929.XP_001482262.1	0	0	0	0	0.961	0	0	0.259	0.969
XYL1	PGUG_05726	1858307	1852725	4929.XP_001487545.1	4929.XP_001481963.1	0.052	0	0	0	0.247	0.094	0.900	0.606	0.969
PGUG_02042	PGUG_03850	1857133	1855231	4929.XP_001486371.1	4929.XP_001484469.1	0.065	0.011	0	0	0.224	0.112	0.900	0.601	0.969
PGUG_02908	PGUG_05080	1855941	1853887	4929.XP_001485179.1	4929.XP_001483125.1	0	0	0	0	0.722	0.085	0	0.890	0.969
TIF6	PGUG_05474	1854852	1853216	4929.XP_001484090.1	4929.XP_001482454.1	0	0	0	0	0.603	0.722	0	0.746	0.969
PGUG_04679	PGUG_05240	1853486	1852982	4929.XP_001482724.1	4929.XP_001482220.1	0.176	0	0	0	0.178	0	0.900	0.608	0.969
PGUG_03596	PGUG_04960	1854977	1853767	4929.XP_001484215.1	4929.XP_001483005.1	0	0	0	0	0.607	0.768	0	0.694	0.969
PGUG_01379	PGUG_04713	1856470	1853520	4929.XP_001485708.1	4929.XP_001482758.1	0	0	0.298	0	0	0	0.900	0.605	0.969
PGUG_00965	PGUG_02777	1858350	1855810	4929.XP_001487588.1	4929.XP_001485048.1	0	0	0	0	0.048	0	0.900	0.708	0.969
PGUG_02057	PGUG_01408	1857148	1856499	4929.XP_001486386.1	4929.XP_001485737.1	0	0	0	0	0.603	0.678	0	0.777	0.969
PGUG_02025	UTP10	1857116	1855581	4929.XP_001486354.1	4929.XP_001484819.1	0	0	0	0	0.962	0.068	0	0.217	0.969
PGUG_04294	PGUG_05282	1854327	1853024	4929.XP_001483565.1	4929.XP_001482262.1	0.175	0	0	0	0.818	0.665	0	0.458	0.969
PGUG_02290	PGUG_05726	1857381	1852725	4929.XP_001486619.1	4929.XP_001481963.1	0.052	0	0	0	0.247	0.094	0.900	0.606	0.969
PGUG_02674	PGUG_04041	1855707	1854074	4929.XP_001484945.1	4929.XP_001483312.1	0.126	0	0	0	0.115	0	0.900	0.650	0.969
DRS1	PGUG_04294	1855295	1854327	4929.XP_001484533.1	4929.XP_001483565.1	0.054	0	0	0	0.900	0.697	0	0.056	0.969
PGUG_03772	SPB1	1855153	1854816	4929.XP_001484391.1	4929.XP_001484054.1	0	0	0	0	0.956	0	0	0.312	0.968
PGUG_00228	PGUG_05240	1857613	1852982	4929.XP_001486851.1	4929.XP_001482220.1	0.215	0	0	0	0.176	0	0.900	0.567	0.968
PGUG_02526	PGUG_04670	1855559	1853477	4929.XP_001484797.1	4929.XP_001482715.1	0	0	0	0	0.204	0.711	0	0.875	0.968
EFT2	PGUG_05785	1855945	1852785	4929.XP_001485183.1	4929.XP_001482023.1	0.065	0	0	0	0.736	0.830	0	0.333	0.968
PGUG_03433	ACT1	1854814	1853342	4929.XP_001484052.1	4929.XP_001482580.1	0	0	0	0	0.051	0.713	0	0.892	0.968
PGUG_02674	HAM1	1855707	1855702	4929.XP_001484945.1	4929.XP_001484940.1	0.219	0	0	0	0.079	0	0.900	0.618	0.968
PGUG_00383	PGUG_01401	1857768	1856492	4929.XP_001487006.1	4929.XP_001485730.1	0.176	0	0	0	0.603	0.893	0	0.214	0.968
PGUG_02291	PGUG_01600	1857382	1856691	4929.XP_001486620.1	4929.XP_001485929.1	0	0	0	0	0.968	0	0	0	0.968
PGUG_00979	PGUG_04538	1858364	1854571	4929.XP_001487602.1	4929.XP_001483809.1	0	0	0	0	0.540	0.885	0	0.444	0.968
PGUG_02732	PGUG_04817	1855765	1853624	4929.XP_001485003.1	4929.XP_001482862.1	0	0	0	0	0.247	0.737	0	0.850	0.967
PGUG_00671	PGUG_03140	1858056	1856173	4929.XP_001487294.1	4929.XP_001485411.1	0.176	0.002	0	0	0.046	0	0.900	0.631	0.967
PGUG_01095	PGUG_02402	1858480	1855435	4929.XP_001487718.1	4929.XP_001484673.1	0.175	0	0	0	0.053	0	0.900	0.634	0.967
PGUG_01095	PGUG_02404	1858480	1855436	4929.XP_001487718.1	4929.XP_001484674.1	0.175	0	0	0	0.053	0	0.900	0.634	0.967
PGUG_00716	PGUG_04335	1858101	1854368	4929.XP_001487339.1	4929.XP_001483606.1	0.048	0	0	0	0.167	0.088	0.900	0.624	0.967
PGUG_00503	PGUG_02798	1857888	1855831	4929.XP_001487126.1	4929.XP_001485069.1	0.176	0	0	0	0.715	0.724	0	0.558	0.967
PGUG_00476	PGUG_01677	1857861	1856768	4929.XP_001487099.1	4929.XP_001486006.1	0.176	0	0	0	0.047	0	0.900	0.632	0.967
PGUG_04072	PGUG_05084	1854105	1853891	4929.XP_001483343.1	4929.XP_001483129.1	0.162	0	0	0	0.130	0	0.900	0.606	0.967
PGUG_01007	PGUG_04832	1858392	1853639	4929.XP_001487630.1	4929.XP_001482877.1	0	0	0	0	0.732	0.732	0	0.588	0.967
PGUG_00918	ADK1	1858303	1858262	4929.XP_001487541.1	4929.XP_001487500.1	0.054	0	0	0	0.096	0.128	0.900	0.627	0.967
PGUG_03816	PGUG_04832	1855197	1853639	4929.XP_001484435.1	4929.XP_001482877.1	0	0	0.310	0	0.719	0.727	0	0.459	0.967
PGUG_00961	PGUG_00756	1858346	1858141	4929.XP_001487584.1	4929.XP_001487379.1	0	0	0	0	0.733	0.835	0	0.324	0.967
PGUG_02025	PGUG_04294	1857116	1854327	4929.XP_001486354.1	4929.XP_001483565.1	0	0	0	0	0.758	0.682	0	0.608	0.967
PGUG_02715	PGUG_05009	1855748	1853816	4929.XP_001484986.1	4929.XP_001483054.1	0	0	0	0	0.059	0.723	0	0.886	0.967
PGUG_00142	PGUG_05584	1857527	1853326	4929.XP_001486765.1	4929.XP_001482564.1	0.219	0	0	0	0	0	0.900	0.618	0.967
PGUG_03724	PGUG_05295	1855105	1853037	4929.XP_001484343.1	4929.XP_001482275.1	0.219	0	0	0	0.053	0.279	0.800	0.745	0.967
SPB1	PGUG_05474	1854816	1853216	4929.XP_001484054.1	4929.XP_001482454.1	0	0	0	0	0.736	0.699	0	0.612	0.966
PGUG_01055	PGUG_03162	1858440	1856195	4929.XP_001487678.1	4929.XP_001485433.1	0	0	0	0	0.053	0.702	0	0.892	0.966
PGUG_03842	DBP10	1855223	1854247	4929.XP_001484461.1	4929.XP_001483485.1	0	0	0	0	0.959	0.155	0	0.119	0.966
PGUG_00142	PGUG_02911	1857527	1855944	4929.XP_001486765.1	4929.XP_001485182.1	0.219	0	0	0	0.208	0	0.900	0.519	0.966
PGUG_01147	PGUG_01797	1858532	1856888	4929.XP_001487770.1	4929.XP_001486126.1	0.098	0	0	0	0.256	0.260	0.900	0.422	0.966
PGUG_03145	PGUG_04001	1856178	1854034	4929.XP_001485416.1	4929.XP_001483272.1	0.176	0	0	0	0.178	0	0.900	0.559	0.966
PGUG_01829	PGUG_04538	1856920	1854571	4929.XP_001486158.1	4929.XP_001483809.1	0	0	0	0	0.127	0.887	0	0.687	0.966
PGUG_01467	PGUG_04243	1856558	1854276	4929.XP_001485796.1	4929.XP_001483514.1	0.054	0	0	0	0.739	0.070	0	0.872	0.966
PGUG_00503	PGUG_01877	1857888	1856967	4929.XP_001487126.1	4929.XP_001486205.1	0.176	0	0	0	0.716	0.724	0	0.549	0.966
PGUG_00866	PGUG_00031	1858251	1857416	4929.XP_001487489.1	4929.XP_001486654.1	0	0	0	0	0.433	0.801	0	0.731	0.966
PGUG_02781	PGUG_02608	1855814	1855641	4929.XP_001485052.1	4929.XP_001484879.1	0.090	0	0	0	0.569	0.673	0	0.770	0.966
PGUG_00965	PGUG_03973	1858350	1854006	4929.XP_001487588.1	4929.XP_001483244.1	0	0	0	0	0	0	0.900	0.676	0.966
PGUG_02911	PGUG_02305	1855944	1855338	4929.XP_001485182.1	4929.XP_001484576.1	0.176	0	0	0	0.647	0.268	0	0.861	0.966
PGUG_00657	PGUG_02333	1858042	1855366	4929.XP_001487280.1	4929.XP_001484604.1	0.053	0	0	0	0.719	0.727	0	0.596	0.966
MEU1	PGUG_05047	1854963	1853854	4929.XP_001484201.1	4929.XP_001483092.1	0.097	0	0	0	0.178	0	0.900	0.599	0.966
PGUG_01063	PGUG_02144	1858448	1857235	4929.XP_001487686.1	4929.XP_001486473.1	0	0	0	0	0.352	0.741	0	0.819	0.966
PGUG_04538	PGUG_04817	1854571	1853624	4929.XP_001483809.1	4929.XP_001482862.1	0	0	0	0	0.245	0.816	0	0.779	0.966
PGUG_02681	PGUG_03331	1855714	1854712	4929.XP_001484952.1	4929.XP_001483950.1	0.145	0	0	0	0.591	0.222	0	0.890	0.966
PGUG_01147	PGUG_03620	1858532	1855001	4929.XP_001487770.1	4929.XP_001484239.1	0.098	0	0	0	0.256	0.260	0.900	0.422	0.966
PGUG_02595	PGUG_05561	1855628	1853303	4929.XP_001484866.1	4929.XP_001482541.1	0	0	0	0	0.114	0.145	0.900	0.606	0.966
PGUG_00414	PGUG_05518	1857799	1853260	4929.XP_001487037.1	4929.XP_001482498.1	0.162	0	0	0	0.736	0.543	0	0.709	0.966
PGUG_02525	PGUG_04657	1855558	1853464	4929.XP_001484796.1	4929.XP_001482702.1	0.213	0	0	0	0	0	0.900	0.606	0.966
PGUG_03973	PGUG_05240	1854006	1852982	4929.XP_001483244.1	4929.XP_001482220.1	0.219	0	0	0	0.043	0	0.900	0.606	0.966
PGUG_04813	PGUG_05561	1853620	1853303	4929.XP_001482858.1	4929.XP_001482541.1	0	0	0.480	0.969	0	0.665	0.900	0.891	0.966
TIF6	PGUG_04074	1854852	1854106	4929.XP_001484090.1	4929.XP_001483344.1	0	0	0	0	0.194	0.769	0	0.834	0.966
DRS1	PGUG_04088	1855295	1854121	4929.XP_001484533.1	4929.XP_001483359.1	0	0	0	0	0.966	0	0	0	0.966
PGUG_02057	PGUG_05629	1857148	1853371	4929.XP_001486386.1	4929.XP_001482609.1	0	0	0	0	0.603	0.638	0	0.783	0.966
PGUG_04079	PGUG_04960	1854112	1853767	4929.XP_001483350.1	4929.XP_001483005.1	0	0	0	0	0.649	0.807	0	0.548	0.966
PGUG_00031	PGUG_05282	1857416	1853024	4929.XP_001486654.1	4929.XP_001482262.1	0	0	0	0	0.737	0.681	0	0.634	0.966
PGUG_00901	PGUG_02279	1858286	1857370	4929.XP_001487524.1	4929.XP_001486608.1	0	0	0	0	0.603	0.893	0	0.276	0.966
PGUG_00899	PGUG_01951	1858284	1857042	4929.XP_001487522.1	4929.XP_001486280.1	0	0	0	0	0.109	0.679	0	0.892	0.966
PGUG_01239	PGUG_02579	1856330	1855612	4929.XP_001485568.1	4929.XP_001484850.1	0	0	0	0	0.138	0	0.900	0.632	0.965
PGUG_00503	PGUG_05785	1857888	1852785	4929.XP_001487126.1	4929.XP_001482023.1	0.098	0	0	0	0.716	0.724	0	0.568	0.965
PGUG_03741	PGUG_04024	1855122	1854057	4929.XP_001484360.1	4929.XP_001483295.1	0.098	0	0	0	0.145	0	0.900	0.605	0.965
PGUG_00337	PGUG_04068	1857722	1854101	4929.XP_001486960.1	4929.XP_001483339.1	0.064	0	0	0	0	0.153	0.900	0.618	0.965
PGUG_03622	DBP2	1855002	1854064	4929.XP_001484240.1	4929.XP_001483302.1	0	0	0	0	0.951	0.281	0	0.102	0.965
EFT2	PGUG_04408	1855945	1854441	4929.XP_001485183.1	4929.XP_001483679.1	0	0	0	0	0.745	0.815	0	0.320	0.965
PGUG_00756	PGUG_01829	1858141	1856920	4929.XP_001487379.1	4929.XP_001486158.1	0	0	0	0	0.097	0.885	0	0.694	0.965
SPB4	PGUG_04088	1855458	1854121	4929.XP_001484696.1	4929.XP_001483359.1	0	0	0	0	0.963	0.043	0	0.100	0.965
PGUG_04771	PGUG_04713	1853578	1853520	4929.XP_001482816.1	4929.XP_001482758.1	0.076	0	0	0	0.107	0	0.900	0.634	0.965
PGUG_02603	PGUG_04828	1855636	1853635	4929.XP_001484874.1	4929.XP_001482873.1	0	0	0	0	0.062	0	0.900	0.659	0.965
PGUG_01408	PGUG_05629	1856499	1853371	4929.XP_001485737.1	4929.XP_001482609.1	0.054	0	0	0	0.613	0.545	0	0.819	0.965
PGUG_02836	PGUG_03738	1855869	1855119	4929.XP_001485107.1	4929.XP_001484357.1	0	0	0	0	0.053	0	0.900	0.664	0.965
PGUG_04347	MAP2	1854380	1852789	4929.XP_001483618.1	4929.XP_001482027.1	0	0	0	0	0.661	0.128	0	0.892	0.965
PGUG_00485	RPS0	1857870	1855403	4929.XP_001487108.1	4929.XP_001484641.1	0	0	0	0	0.690	0.893	0	0.050	0.965
PGUG_00294	PGUG_05295	1857679	1853037	4929.XP_001486917.1	4929.XP_001482275.1	0.217	0	0	0	0.211	0.165	0.800	0.717	0.965
PGUG_02291	PGUG_05099	1857382	1853906	4929.XP_001486620.1	4929.XP_001483144.1	0	0	0	0	0.956	0.249	0	0	0.965
PGUG_00102	PGUG_02805	1857487	1855838	4929.XP_001486725.1	4929.XP_001485076.1	0.080	0	0	0	0.121	0.084	0.900	0.611	0.965
PGUG_00730	PGUG_03416	1858115	1854797	4929.XP_001487353.1	4929.XP_001484035.1	0.219	0	0	0	0.639	0	0	0.888	0.965
PGUG_00716	PGUG_03763	1858101	1855144	4929.XP_001487339.1	4929.XP_001484382.1	0.079	0	0	0	0.106	0	0.900	0.635	0.965
PGUG_02291	PGUG_03842	1857382	1855223	4929.XP_001486620.1	4929.XP_001484461.1	0	0	0	0	0.952	0.261	0	0.114	0.965
PGUG_00501	PGUG_05919	1857886	1852673	4929.XP_001487124.1	4929.XP_001481911.1	0	0	0	0	0	0.717	0.800	0.447	0.965
PGUG_02603	PGUG_05333	1855636	1853075	4929.XP_001484874.1	4929.XP_001482313.1	0.126	0	0	0	0.138	0	0.900	0.601	0.965
PGUG_02229	PGUG_04266	1857320	1854300	4929.XP_001486558.1	4929.XP_001483538.1	0.065	0	0	0	0.096	0.088	0.900	0.618	0.965
PGUG_00337	PGUG_03738	1857722	1855119	4929.XP_001486960.1	4929.XP_001484357.1	0	0	0	0	0.057	0.153	0.900	0.606	0.964
PGUG_00816	PGUG_00565	1858201	1857950	4929.XP_001487439.1	4929.XP_001487188.1	0.219	0	0	0	0.252	0.739	0	0.792	0.964
PGUG_02360	PGUG_04024	1855393	1854057	4929.XP_001484631.1	4929.XP_001483295.1	0.097	0	0	0	0.047	0	0.900	0.636	0.964
PGUG_00860	PGUG_05238	1858245	1852980	4929.XP_001487483.1	4929.XP_001482218.1	0.045	0	0	0	0.737	0.444	0	0.773	0.964
PGUG_00503	PGUG_01891	1857888	1856982	4929.XP_001487126.1	4929.XP_001486220.1	0.098	0	0	0	0.716	0.724	0	0.555	0.964
PGUG_00485	PGUG_01951	1857870	1857042	4929.XP_001487108.1	4929.XP_001486280.1	0	0	0	0	0.684	0.893	0	0	0.964
PGUG_00031	PGUG_02025	1857416	1857116	4929.XP_001486654.1	4929.XP_001486354.1	0	0	0	0	0.955	0.068	0	0.218	0.964
PGUG_00866	PGUG_03307	1858251	1854688	4929.XP_001487489.1	4929.XP_001483926.1	0	0	0	0	0.737	0.801	0	0.384	0.964
SEC13	PGUG_03726	1855723	1855107	4929.XP_001484961.1	4929.XP_001484345.1	0	0	0	0.751	0.053	0.954	0	0.892	0.964
PGUG_02601	PGUG_03973	1855634	1854006	4929.XP_001484872.1	4929.XP_001483244.1	0	0	0	0	0	0	0.900	0.664	0.964
PGUG_00926	PGUG_00671	1858311	1858056	4929.XP_001487549.1	4929.XP_001487294.1	0.173	0	0	0	0.044	0	0.900	0.604	0.964
PGUG_03068	PGUG_05628	1856101	1853370	4929.XP_001485339.1	4929.XP_001482608.1	0	0	0	0	0.044	0	0.800	0.827	0.964
PGUG_03145	PGUG_02996	1856178	1856029	4929.XP_001485416.1	4929.XP_001485267.1	0.176	0	0	0	0.045	0	0.900	0.602	0.964
PGUG_00080	PGUG_04024	1857465	1854057	4929.XP_001486703.1	4929.XP_001483295.1	0.097	0	0	0	0.047	0	0.900	0.636	0.964
LIA1	PGUG_05006	1857822	1853813	4929.XP_001487060.1	4929.XP_001483051.1	0	0	0	0	0.964	0	0	0	0.964
PGUG_00503	PGUG_03990	1857888	1854023	4929.XP_001487126.1	4929.XP_001483261.1	0.098	0	0	0	0.716	0.724	0	0.551	0.964
PGUG_00031	PGUG_01600	1857416	1856691	4929.XP_001486654.1	4929.XP_001485929.1	0	0	0	0	0.745	0.824	0	0.277	0.964
PGUG_00901	PGUG_00363	1858286	1857748	4929.XP_001487524.1	4929.XP_001486986.1	0	0	0	0	0.891	0.486	0	0.413	0.964
PGUG_01600	PGUG_05474	1856691	1853216	4929.XP_001485929.1	4929.XP_001482454.1	0	0	0	0	0.603	0.880	0	0.319	0.964
PGUG_03114	PGUG_05826	1856147	1852825	4929.XP_001485385.1	4929.XP_001482063.1	0	0	0	0	0.095	0.665	0	0.889	0.963
PGUG_02539	PGUG_02333	1855572	1855366	4929.XP_001484810.1	4929.XP_001484604.1	0.076	0	0	0	0.722	0.727	0	0.544	0.963
PGUG_01891	PGUG_05290	1856982	1853032	4929.XP_001486220.1	4929.XP_001482270.1	0	0	0	0	0.603	0.893	0	0.204	0.963
PGUG_04960	PGUG_04817	1853767	1853624	4929.XP_001483005.1	4929.XP_001482862.1	0	0	0	0	0.212	0.812	0	0.776	0.963
EFT2	PGUG_05105	1855945	1853912	4929.XP_001485183.1	4929.XP_001483150.1	0.065	0	0	0	0.571	0.854	0	0.444	0.963
PGUG_00926	PGUG_05024	1858311	1853831	4929.XP_001487549.1	4929.XP_001483069.1	0	0	0	0	0.564	0	0.800	0.619	0.963
PGUG_02333	PGUG_04207	1855366	1854240	4929.XP_001484604.1	4929.XP_001483478.1	0	0	0	0	0.719	0.727	0	0.566	0.963
PGUG_01501	PGUG_04648	1856592	1853455	4929.XP_001485830.1	4929.XP_001482693.1	0	0	0	0.847	0.173	0.768	0.800	0.892	0.963
SPB1	PGUG_04294	1854816	1854327	4929.XP_001484054.1	4929.XP_001483565.1	0.062	0	0	0	0.952	0.184	0	0.121	0.963
SPB1	PGUG_03430	1854816	1854811	4929.XP_001484054.1	4929.XP_001484049.1	0	0	0	0	0.844	0.752	0	0.138	0.963
PGUG_00569	PGUG_05826	1857954	1852825	4929.XP_001487192.1	4929.XP_001482063.1	0	0	0	0	0.059	0.681	0	0.888	0.963
PGUG_03003	PGUG_02603	1856036	1855636	4929.XP_001485274.1	4929.XP_001484874.1	0.168	0	0	0	0.050	0.109	0.900	0.566	0.963
PGUG_02781	PGUG_02681	1855814	1855714	4929.XP_001485052.1	4929.XP_001484952.1	0.162	0	0	0	0.173	0.728	0	0.829	0.963
PGUG_02291	DBP10	1857382	1854247	4929.XP_001486620.1	4929.XP_001483485.1	0	0	0	0	0.931	0.248	0	0.359	0.963
PGUG_00926	PGUG_04807	1858311	1853614	4929.XP_001487549.1	4929.XP_001482852.1	0	0	0	0	0.564	0	0.800	0.619	0.963
PGUG_02577	PGUG_03730	1855610	1855111	4929.XP_001484848.1	4929.XP_001484349.1	0	0	0	0	0.122	0.266	0.900	0.487	0.962
PGUG_03730	PGUG_03485	1855111	1854866	4929.XP_001484349.1	4929.XP_001484104.1	0	0	0	0	0.122	0.266	0.900	0.487	0.962
PGUG_00939	PGUG_03123	1858324	1856156	4929.XP_001487562.1	4929.XP_001485394.1	0.176	0	0	0	0.684	0.573	0	0.705	0.962
PGUG_02391	PGUG_04307	1855424	1854340	4929.XP_001484662.1	4929.XP_001483578.1	0	0	0	0	0.053	0.665	0	0.892	0.962
PGUG_00503	RPS1	1857888	1853516	4929.XP_001487126.1	4929.XP_001482754.1	0	0	0	0	0.716	0.724	0	0.564	0.962
PGUG_01772	PGUG_01384	1856863	1856475	4929.XP_001486101.1	4929.XP_001485713.1	0	0	0	0	0.959	0	0	0.115	0.962
PGUG_03331	PGUG_03276	1854712	1854657	4929.XP_001483950.1	4929.XP_001483895.1	0	0	0	0	0.513	0	0.900	0.295	0.962
PGUG_05134	PGUG_04749	1853941	1853556	4929.XP_001483179.1	4929.XP_001482794.1	0	0	0	0	0.208	0.825	0	0.753	0.962
MET3	PGUG_04771	1853890	1853578	4929.XP_001483128.1	4929.XP_001482816.1	0	0	0	0	0.720	0	0	0.870	0.962
PGUG_00485	PGUG_05417	1857870	1853159	4929.XP_001487108.1	4929.XP_001482397.1	0	0	0	0	0.662	0.893	0	0.043	0.962
PGUG_00485	PGUG_02251	1857870	1857342	4929.XP_001487108.1	4929.XP_001486580.1	0	0	0	0	0.664	0.893	0	0	0.962
PGUG_02333	PGUG_04375	1855366	1854408	4929.XP_001484604.1	4929.XP_001483646.1	0	0	0	0	0.719	0.727	0	0.552	0.962
PGUG_02545	PGUG_04832	1855578	1853639	4929.XP_001484816.1	4929.XP_001482877.1	0	0	0	0	0.719	0.727	0	0.550	0.962
PGUG_00965	PGUG_00671	1858350	1858056	4929.XP_001487588.1	4929.XP_001487294.1	0	0	0	0	0.046	0	0.900	0.635	0.962
PGUG_00901	PGUG_02089	1858286	1857180	4929.XP_001487524.1	4929.XP_001486418.1	0	0	0	0	0.929	0.476	0	0	0.961
PGUG_02603	PGUG_04648	1855636	1853455	4929.XP_001484874.1	4929.XP_001482693.1	0.053	0	0	0	0.100	0	0.900	0.606	0.961
PGUG_00965	PGUG_05295	1858350	1853037	4929.XP_001487588.1	4929.XP_001482275.1	0	0	0	0	0.143	0	0.900	0.590	0.961
PGUG_01501	PGUG_02603	1856592	1855636	4929.XP_001485830.1	4929.XP_001484874.1	0.053	0	0	0	0.094	0	0.900	0.607	0.961
PGUG_00833	PGUG_02601	1858218	1855634	4929.XP_001487456.1	4929.XP_001484872.1	0	0	0	0	0.045	0.063	0.900	0.618	0.961
PGUG_01503	PGUG_05294	1856594	1853036	4929.XP_001485832.1	4929.XP_001482274.1	0	0	0	0	0.307	0.119	0.900	0.447	0.961
PGUG_01405	PGUG_03724	1856496	1855105	4929.XP_001485734.1	4929.XP_001484343.1	0	0	0	0	0.083	0	0.800	0.807	0.961
PGUG_00485	PGUG_00383	1857870	1857768	4929.XP_001487108.1	4929.XP_001487006.1	0	0	0	0	0.653	0.893	0	0	0.961
PGUG_00730	PGUG_00240	1858115	1857625	4929.XP_001487353.1	4929.XP_001486863.1	0.219	0	0	0	0.736	0.068	0	0.823	0.961
EFT2	PGUG_03990	1855945	1854023	4929.XP_001485183.1	4929.XP_001483261.1	0.065	0	0	0	0.737	0.832	0	0.172	0.961
PGUG_01430	PGUG_05629	1856521	1853371	4929.XP_001485759.1	4929.XP_001482609.1	0.089	0	0	0	0.641	0.536	0	0.779	0.961
PGUG_00657	EFT2	1858042	1855945	4929.XP_001487280.1	4929.XP_001485183.1	0.065	0	0	0	0.736	0.846	0	0.116	0.961
PGUG_00365	PGUG_04673	1857750	1853480	4929.XP_001486988.1	4929.XP_001482718.1	0	0	0	0	0.170	0.675	0.600	0.687	0.961
PGUG_00716	PGUG_01282	1858101	1856373	4929.XP_001487339.1	4929.XP_001485611.1	0.176	0	0	0	0.174	0.116	0.800	0.731	0.961
PGUG_02540	PGUG_05294	1855573	1853036	4929.XP_001484811.1	4929.XP_001482274.1	0	0	0	0	0.307	0.119	0.900	0.447	0.961
PGUG_02603	PGUG_04085	1855636	1854118	4929.XP_001484874.1	4929.XP_001483356.1	0.098	0	0	0	0.129	0.248	0.900	0.446	0.961
PGUG_04408	PGUG_04832	1854441	1853639	4929.XP_001483679.1	4929.XP_001482877.1	0	0	0	0	0.719	0.727	0	0.542	0.961
PGUG_00363	PGUG_05290	1857748	1853032	4929.XP_001486986.1	4929.XP_001482270.1	0	0	0	0	0.649	0.893	0	0.051	0.961
PGUG_02386	PGUG_04742	1855419	1853549	4929.XP_001484657.1	4929.XP_001482787.1	0	0	0.217	0	0.045	0	0.800	0.773	0.961
PGUG_01401	PGUG_04408	1856492	1854441	4929.XP_001485730.1	4929.XP_001483679.1	0	0	0	0	0.651	0.893	0	0	0.961
PGUG_02798	PGUG_02333	1855831	1855366	4929.XP_001485069.1	4929.XP_001484604.1	0	0	0	0	0.719	0.727	0	0.530	0.960
PGUG_00894	PGUG_04223	1858279	1854256	4929.XP_001487517.1	4929.XP_001483494.1	0.083	0	0	0	0.048	0	0.900	0.605	0.960
PGUG_01007	PGUG_02333	1858392	1855366	4929.XP_001487630.1	4929.XP_001484604.1	0	0	0	0	0.719	0.727	0	0.529	0.960
PGUG_05006	PGUG_05282	1853813	1853024	4929.XP_001483051.1	4929.XP_001482262.1	0	0	0	0	0.959	0	0	0.087	0.960
PGUG_05099	PGUG_05282	1853906	1853024	4929.XP_001483144.1	4929.XP_001482262.1	0	0	0	0	0.960	0.064	0	0	0.960
PGUG_03043	PGUG_05630	1856076	1853372	4929.XP_001485314.1	4929.XP_001482610.1	0.064	0	0	0	0.684	0.679	0	0.632	0.960
PGUG_04223	PGUG_05558	1854256	1853300	4929.XP_001483494.1	4929.XP_001482538.1	0.083	0	0	0	0.048	0	0.900	0.605	0.960
PGUG_00719	PGUG_00503	1858104	1857888	4929.XP_001487342.1	4929.XP_001487126.1	0	0	0	0	0.708	0.724	0	0.550	0.960
PGUG_03738	PGUG_05623	1855119	1853365	4929.XP_001484357.1	4929.XP_001482603.1	0.079	0	0	0	0	0	0.900	0.606	0.960
PGUG_04375	PGUG_04832	1854408	1853639	4929.XP_001483646.1	4929.XP_001482877.1	0.176	0	0	0	0.719	0.727	0	0.443	0.960
DRS1	PGUG_05006	1855295	1853813	4929.XP_001484533.1	4929.XP_001483051.1	0	0.001	0	0	0.956	0.130	0	0	0.960
PGUG_03061	PGUG_03738	1856094	1855119	4929.XP_001485332.1	4929.XP_001484357.1	0	0	0	0	0.043	0	0.900	0.616	0.960
PGUG_00671	PGUG_02601	1858056	1855634	4929.XP_001487294.1	4929.XP_001484872.1	0	0	0	0	0.046	0	0.900	0.616	0.960
PGUG_02333	PGUG_03816	1855366	1855197	4929.XP_001484604.1	4929.XP_001484435.1	0	0	0	0	0.719	0.727	0	0.524	0.960
BNA5	BNA7	1854425	1853786	4929.XP_001483663.1	4929.XP_001483024.1	0	0	0	0	0	0	0.900	0.624	0.960
PGUG_00716	PGUG_03808	1858101	1855189	4929.XP_001487339.1	4929.XP_001484427.1	0.219	0	0	0	0.737	0.111	0	0.808	0.960
PGUG_00779	PGUG_04691	1858164	1853498	4929.XP_001487402.1	4929.XP_001482736.1	0	0	0	0	0.081	0.675	0	0.878	0.960
PGUG_00207	PGUG_01763	1857592	1856854	4929.XP_001486830.1	4929.XP_001486092.1	0.386	0	0	0	0.737	0	0	0.777	0.960
PGUG_00793	PGUG_04875	1858178	1853682	4929.XP_001487416.1	4929.XP_001482920.1	0.048	0.686	0	0	0.172	0.523	0	0.720	0.960
PGUG_02911	PGUG_04085	1855944	1854118	4929.XP_001485182.1	4929.XP_001483356.1	0.176	0	0	0	0.210	0	0.900	0.446	0.959
PGUG_02383	PGUG_04243	1855416	1854276	4929.XP_001484654.1	4929.XP_001483514.1	0.194	0	0	0	0.603	0	0	0.885	0.959
PGUG_03140	PGUG_02911	1856173	1855944	4929.XP_001485411.1	4929.XP_001485182.1	0.219	0	0.319	0	0.687	0.137	0	0.763	0.959
PGUG_02641	PGUG_03290	1855674	1854671	4929.XP_001484912.1	4929.XP_001483909.1	0	0	0	0	0.045	0	0.900	0.607	0.959
PGUG_02595	PGUG_04813	1855628	1853620	4929.XP_001484866.1	4929.XP_001482858.1	0	0	0	0	0.114	0.209	0.900	0.495	0.959
UTP10	PGUG_04088	1855581	1854121	4929.XP_001484819.1	4929.XP_001483359.1	0	0	0	0	0.959	0	0	0	0.959
PGUG_02641	PGUG_03274	1855674	1854655	4929.XP_001484912.1	4929.XP_001483893.1	0	0	0	0	0.045	0	0.900	0.607	0.959
UTP10	DRS1	1855581	1855295	4929.XP_001484819.1	4929.XP_001484533.1	0	0	0	0	0.958	0.068	0	0.050	0.959
PGUG_01556	PGUG_02879	1856647	1855912	4929.XP_001485885.1	4929.XP_001485150.1	0	0	0	0	0.045	0.893	0	0.634	0.959
PGUG_01063	PGUG_04809	1858448	1853616	4929.XP_001487686.1	4929.XP_001482854.1	0	0	0	0	0.045	0.893	0	0.633	0.959
PGUG_03622	PGUG_03430	1855002	1854811	4929.XP_001484240.1	4929.XP_001484049.1	0	0	0	0	0.956	0.087	0	0.066	0.959
PGUG_04230	PGUG_04018	1854263	1854051	4929.XP_001483501.1	4929.XP_001483289.1	0.052	0	0	0	0.095	0.684	0	0.869	0.959
EFT2	PGUG_02624	1855945	1855657	4929.XP_001485183.1	4929.XP_001484895.1	0.089	0	0	0	0.736	0.826	0	0.127	0.958
PGUG_05474	PGUG_05417	1853216	1853159	4929.XP_001482454.1	4929.XP_001482397.1	0	0	0.223	0	0.730	0.815	0	0.051	0.958
PGUG_04648	PGUG_05333	1853455	1853075	4929.XP_001482693.1	4929.XP_001482313.1	0.054	0	0	0	0.095	0	0.900	0.570	0.958
PGUG_02333	PGUG_05785	1855366	1852785	4929.XP_001484604.1	4929.XP_001482023.1	0.054	0	0	0	0.719	0.727	0	0.492	0.958
PGUG_01379	PGUG_03057	1856470	1856090	4929.XP_001485708.1	4929.XP_001485328.1	0	0	0	0	0.052	0.128	0.800	0.779	0.958
PGUG_01677	PGUG_03480	1856768	1854861	4929.XP_001486006.1	4929.XP_001484099.1	0.176	0	0	0	0.175	0	0.900	0.457	0.958
PGUG_01503	PGUG_03757	1856594	1855138	4929.XP_001485832.1	4929.XP_001484376.1	0.054	0	0	0	0.085	0.254	0.900	0.451	0.958
PGUG_01282	RBK1	1856373	1855802	4929.XP_001485611.1	4929.XP_001485040.1	0.049	0	0	0	0.057	0	0.900	0.594	0.958
PGUG_00296	PGUG_05787	1857681	1852786	4929.XP_001486919.1	4929.XP_001482024.1	0	0	0	0	0.237	0.768	0	0.784	0.958
PGUG_04739	PGUG_05290	1853546	1853032	4929.XP_001482784.1	4929.XP_001482270.1	0	0	0	0	0.603	0.807	0	0.500	0.958
PGUG_03757	PGUG_04335	1855138	1854368	4929.XP_001484376.1	4929.XP_001483606.1	0	0	0	0	0.115	0	0.900	0.564	0.958
PGUG_00965	PGUG_04679	1858350	1853486	4929.XP_001487588.1	4929.XP_001482724.1	0	0	0	0	0.172	0.048	0.900	0.538	0.958
PGUG_01379	PGUG_03124	1856470	1856157	4929.XP_001485708.1	4929.XP_001485395.1	0	0	0	0	0.097	0.057	0.800	0.783	0.958
PGUG_00164	PGUG_02996	1857549	1856029	4929.XP_001486787.1	4929.XP_001485267.1	0	0	0	0	0	0	0.900	0.603	0.958
PGUG_02333	PGUG_04067	1855366	1854100	4929.XP_001484604.1	4929.XP_001483338.1	0.062	0	0	0	0.721	0.727	0	0.485	0.958
PGUG_02540	PGUG_03757	1855573	1855138	4929.XP_001484811.1	4929.XP_001484376.1	0.054	0	0	0	0.085	0.254	0.900	0.451	0.958
PGUG_02777	PGUG_02601	1855810	1855634	4929.XP_001485048.1	4929.XP_001484872.1	0	0	0	0	0.043	0	0.900	0.603	0.958
PGUG_01951	PGUG_05410	1857042	1853152	4929.XP_001486280.1	4929.XP_001482390.1	0	0	0	0	0.617	0.893	0	0	0.957
PGUG_00691	PGUG_02395	1858075	1855428	4929.XP_001487313.1	4929.XP_001484666.1	0.095	0	0	0	0.608	0	0	0.891	0.957
PGUG_03082	HCR1	1856115	1856003	4929.XP_001485353.1	4929.XP_001485241.1	0	0	0	0	0.140	0.267	0.800	0.703	0.957
PGUG_03994	ACT1	1854027	1853342	4929.XP_001483265.1	4929.XP_001482580.1	0	0	0	0	0.043	0.739	0	0.844	0.957
PGUG_01482	PGUG_03380	1856573	1854761	4929.XP_001485811.1	4929.XP_001483999.1	0.176	0.104	0	0	0.085	0	0.900	0.469	0.957
PGUG_03985	PGUG_05558	1854018	1853300	4929.XP_001483256.1	4929.XP_001482538.1	0.077	0	0	0	0.048	0.252	0.900	0.459	0.957
PGUG_00716	PGUG_03724	1858101	1855105	4929.XP_001487339.1	4929.XP_001484343.1	0.219	0	0	0	0.098	0	0.800	0.731	0.957
PGUG_05030	PGUG_05560	1853837	1853302	4929.XP_001483075.1	4929.XP_001482540.1	0.219	0	0	0	0.161	0.507	0	0.885	0.957
PGUG_04067	PGUG_04832	1854100	1853639	4929.XP_001483338.1	4929.XP_001482877.1	0.176	0	0	0	0.736	0.727	0	0.370	0.957
PGUG_01613	PGUG_05238	1856704	1852980	4929.XP_001485942.1	4929.XP_001482218.1	0.045	0	0	0	0.304	0.751	0	0.773	0.957
PGUG_00383	EFT2	1857768	1855945	4929.XP_001487006.1	4929.XP_001485183.1	0.065	0	0	0	0.732	0.831	0	0.116	0.957
PGUG_00294	PGUG_04679	1857679	1853486	4929.XP_001486917.1	4929.XP_001482724.1	0.054	0	0	0	0.079	0.092	0.900	0.545	0.957
PGUG_02610	PGUG_05422	1855643	1853164	4929.XP_001484881.1	4929.XP_001482402.1	0	0	0	0	0.845	0.537	0	0.452	0.957
PGUG_02052	PGUG_05628	1857143	1853370	4929.XP_001486381.1	4929.XP_001482608.1	0.218	0	0	0	0.736	0	0	0.811	0.957
PGUG_00503	PGUG_04316	1857888	1854349	4929.XP_001487126.1	4929.XP_001483587.1	0	0	0	0	0.119	0.954	0	0	0.957
PGUG_04024	PGUG_04804	1854057	1853611	4929.XP_001483295.1	4929.XP_001482849.1	0.219	0	0	0	0.128	0	0.900	0.444	0.957
PGUG_03973	PGUG_04804	1854006	1853611	4929.XP_001483244.1	4929.XP_001482849.1	0	0	0	0	0.737	0	0	0.845	0.957
PGUG_01501	PGUG_05333	1856592	1853075	4929.XP_001485830.1	4929.XP_001482313.1	0.054	0	0	0	0.058	0	0.900	0.570	0.956
PGUG_00657	PGUG_00503	1858042	1857888	4929.XP_001487280.1	4929.XP_001487126.1	0.098	0	0	0	0.715	0.724	0	0.454	0.956
PGUG_00503	PGUG_02089	1857888	1857180	4929.XP_001487126.1	4929.XP_001486418.1	0	0	0	0	0.714	0.724	0	0.493	0.956
PGUG_00142	PGUG_05333	1857527	1853075	4929.XP_001486765.1	4929.XP_001482313.1	0.215	0	0	0	0.097	0.065	0.900	0.444	0.956
PGUG_03809	PGUG_03470	1855190	1854851	4929.XP_001484428.1	4929.XP_001484089.1	0	0	0	0	0.808	0	0	0.783	0.956
PGUG_00719	EFT2	1858104	1855945	4929.XP_001487342.1	4929.XP_001485183.1	0	0	0	0	0.835	0.746	0	0	0.956
PGUG_04294	PGUG_04074	1854327	1854106	4929.XP_001483565.1	4929.XP_001483344.1	0	0	0	0	0.950	0.124	0	0.078	0.956
EFT2	PGUG_02798	1855945	1855831	4929.XP_001485183.1	4929.XP_001485069.1	0.089	0	0	0	0.603	0.828	0	0.381	0.956
PGUG_01465	PGUG_04832	1856556	1853639	4929.XP_001485794.1	4929.XP_001482877.1	0.098	0	0.397	0	0.719	0.727	0	0.121	0.956
PGUG_00503	PGUG_02658	1857888	1855691	4929.XP_001487126.1	4929.XP_001484929.1	0.098	0	0	0	0.716	0.724	0	0.458	0.956
PGUG_00503	PGUG_02539	1857888	1855572	4929.XP_001487126.1	4929.XP_001484810.1	0.098	0	0	0	0.716	0.724	0	0.454	0.956
MEU1	MRI1	1854963	1853738	4929.XP_001484201.1	4929.XP_001482976.1	0.176	0	0.249	0	0.117	0	0.900	0.319	0.956
PGUG_00892	PGUG_05238	1858277	1852980	4929.XP_001487515.1	4929.XP_001482218.1	0	0	0	0	0.108	0.736	0	0.832	0.956
PGUG_03140	PGUG_03817	1856173	1855198	4929.XP_001485411.1	4929.XP_001484436.1	0.219	0	0.239	0	0.669	0.164	0	0.778	0.956
PGUG_05629	PGUG_05518	1853371	1853260	4929.XP_001482609.1	4929.XP_001482498.1	0.049	0	0	0	0.664	0.537	0	0.735	0.955
PGUG_01951	PGUG_01483	1857042	1856574	4929.XP_001486280.1	4929.XP_001485812.1	0	0	0	0	0.599	0.893	0	0	0.955
PGUG_01867	PGUG_02981	1856958	1856014	4929.XP_001486196.1	4929.XP_001485252.1	0	0	0	0	0.246	0.044	0.900	0.452	0.955
PGUG_02333	PGUG_03619	1855366	1855000	4929.XP_001484604.1	4929.XP_001484238.1	0.064	0	0	0	0.719	0.727	0	0.454	0.955
PGUG_01390	PGUG_05030	1856481	1853837	4929.XP_001485719.1	4929.XP_001483075.1	0.219	0	0.255	0	0.225	0.260	0	0.888	0.955
PGUG_03541	MET3	1854922	1853890	4929.XP_001484160.1	4929.XP_001483128.1	0.219	0	0	0	0.053	0	0.900	0.471	0.955
PGUG_02545	PGUG_02333	1855578	1855366	4929.XP_001484816.1	4929.XP_001484604.1	0.076	0	0	0	0.719	0.727	0	0.447	0.955
PGUG_02291	PGUG_03430	1857382	1854811	4929.XP_001486620.1	4929.XP_001484049.1	0	0	0	0	0.832	0.660	0	0.278	0.955
PGUG_00503	PGUG_05491	1857888	1853233	4929.XP_001487126.1	4929.XP_001482471.1	0.098	0	0	0	0.715	0.724	0	0.447	0.955
RIB5	FMN1	1857891	1857669	4929.XP_001487129.1	4929.XP_001486907.1	0.216	0	0	0	0.052	0.065	0.900	0.458	0.955
PGUG_03430	PGUG_04088	1854811	1854121	4929.XP_001484049.1	4929.XP_001483359.1	0	0	0	0	0.744	0.763	0	0.320	0.955
PGUG_02951	PGUG_04734	1855984	1853541	4929.XP_001485222.1	4929.XP_001482779.1	0	0	0	0	0.194	0.768	0	0.780	0.955
PGUG_00866	PGUG_04294	1858251	1854327	4929.XP_001487489.1	4929.XP_001483565.1	0.076	0	0	0	0.768	0.271	0	0.750	0.955
PGUG_01282	PGUG_05295	1856373	1853037	4929.XP_001485611.1	4929.XP_001482275.1	0.170	0	0	0	0.139	0	0.900	0.454	0.955
PGUG_01465	PGUG_02333	1856556	1855366	4929.XP_001485794.1	4929.XP_001484604.1	0.072	0	0.214	0	0.719	0.727	0	0.330	0.955
PGUG_03816	PGUG_05290	1855197	1853032	4929.XP_001484435.1	4929.XP_001482270.1	0	0	0	0	0.603	0.893	0	0	0.955
ADK1	PGUG_02843	1858262	1855876	4929.XP_001487500.1	4929.XP_001485114.1	0	0	0	0	0.053	0	0.800	0.782	0.955
PGUG_02028	PGUG_01483	1857119	1856574	4929.XP_001486357.1	4929.XP_001485812.1	0	0	0	0	0.603	0.893	0	0	0.955
PGUG_00228	PGUG_01405	1857613	1856496	4929.XP_001486851.1	4929.XP_001485734.1	0.219	0	0	0	0.094	0	0.900	0.443	0.955
PGUG_03990	PGUG_05290	1854023	1853032	4929.XP_001483261.1	4929.XP_001482270.1	0	0	0	0	0.603	0.893	0	0	0.955
PGUG_00719	PGUG_04832	1858104	1853639	4929.XP_001487342.1	4929.XP_001482877.1	0	0	0	0	0.719	0.727	0	0.450	0.954
PGUG_02333	PGUG_04408	1855366	1854441	4929.XP_001484604.1	4929.XP_001483679.1	0	0	0	0	0.719	0.727	0	0.452	0.954
PGUG_00055	PGUG_03145	1857440	1856178	4929.XP_001486678.1	4929.XP_001485416.1	0.206	0	0	0	0.209	0	0.900	0.368	0.954
PGUG_04294	PGUG_05006	1854327	1853813	4929.XP_001483565.1	4929.XP_001483051.1	0	0	0	0	0.954	0	0	0	0.954
PGUG_01951	PGUG_05290	1857042	1853032	4929.XP_001486280.1	4929.XP_001482270.1	0.175	0	0	0	0.420	0.893	0	0.215	0.954
PGUG_01568	UTP10	1856659	1855581	4929.XP_001485897.1	4929.XP_001484819.1	0	0	0	0	0.954	0	0	0	0.954
PGUG_01483	PGUG_04408	1856574	1854441	4929.XP_001485812.1	4929.XP_001483679.1	0	0	0	0	0.593	0.893	0	0	0.954
PGUG_01877	PGUG_04832	1856967	1853639	4929.XP_001486205.1	4929.XP_001482877.1	0.176	0	0	0	0.719	0.727	0	0.365	0.954
PGUG_03984	PGUG_05558	1854017	1853300	4929.XP_001483255.1	4929.XP_001482538.1	0.096	0	0	0	0.045	0.054	0.900	0.528	0.954
PGUG_04935	PGUG_04934	1853742	1853741	4929.XP_001482980.1	4929.XP_001482979.1	0	0.601	0.476	0	0	0	0.800	0	0.954
PGUG_02601	PGUG_04679	1855634	1853486	4929.XP_001484872.1	4929.XP_001482724.1	0	0	0	0	0.108	0.043	0.900	0.532	0.954
SPB1	PGUG_05006	1854816	1853813	4929.XP_001484054.1	4929.XP_001483051.1	0	0	0	0	0.954	0	0	0	0.954
PGUG_05333	PGUG_05238	1853075	1852980	4929.XP_001482313.1	4929.XP_001482218.1	0	0	0	0	0.911	0.109	0	0.469	0.954
PGUG_00901	LIA1	1858286	1857822	4929.XP_001487524.1	4929.XP_001487060.1	0.097	0	0	0	0.096	0.558	0	0.888	0.954
PGUG_02911	PGUG_05584	1855944	1853326	4929.XP_001485182.1	4929.XP_001482564.1	0	0	0	0	0.043	0.095	0.900	0.540	0.954
PGUG_00503	PGUG_04375	1857888	1854408	4929.XP_001487126.1	4929.XP_001483646.1	0	0	0	0	0.714	0.724	0	0.466	0.954
PGUG_04832	RPS1	1853639	1853516	4929.XP_001482877.1	4929.XP_001482754.1	0	0	0	0	0.719	0.732	0	0.447	0.954
PGUG_01401	PGUG_04673	1856492	1853480	4929.XP_001485730.1	4929.XP_001482718.1	0.176	0	0	0	0.520	0.734	0	0.620	0.954
PGUG_00657	PGUG_04832	1858042	1853639	4929.XP_001487280.1	4929.XP_001482877.1	0	0	0	0	0.719	0.727	0	0.458	0.954
PGUG_02584	ACT1	1855617	1853342	4929.XP_001484855.1	4929.XP_001482580.1	0	0	0	0	0.054	0.807	0	0.771	0.954
PGUG_01005	PGUG_01527	1858390	1856618	4929.XP_001487628.1	4929.XP_001485856.1	0	0	0	0	0	0	0.900	0.563	0.954
PGUG_00894	PGUG_03984	1858279	1854017	4929.XP_001487517.1	4929.XP_001483255.1	0.096	0	0	0	0.045	0.054	0.900	0.528	0.954
PGUG_00503	PGUG_02624	1857888	1855657	4929.XP_001487126.1	4929.XP_001484895.1	0.176	0	0	0	0.715	0.724	0	0.379	0.954
PGUG_00719	PGUG_02333	1858104	1855366	4929.XP_001487342.1	4929.XP_001484604.1	0	0	0	0	0.719	0.727	0	0.446	0.953
PGUG_00202	PGUG_02542	1857587	1855575	4929.XP_001486825.1	4929.XP_001484813.1	0	0	0	0	0.206	0.661	0	0.842	0.953
PGUG_03558	PGUG_05422	1854939	1853164	4929.XP_001484177.1	4929.XP_001482402.1	0	0	0	0	0.464	0.724	0	0.709	0.953
PGUG_00503	PGUG_04207	1857888	1854240	4929.XP_001487126.1	4929.XP_001483478.1	0	0	0	0	0.716	0.724	0	0.452	0.953
PGUG_03430	PGUG_04074	1854811	1854106	4929.XP_001484049.1	4929.XP_001483344.1	0	0	0	0	0.741	0.248	0	0.780	0.953
PGUG_00939	PGUG_02911	1858324	1855944	4929.XP_001487562.1	4929.XP_001485182.1	0.176	0	0	0	0.179	0.451	0	0.889	0.953
PGUG_02119	PGUG_01829	1857210	1856920	4929.XP_001486448.1	4929.XP_001486158.1	0	0	0	0	0.096	0.879	0	0.606	0.953
PGUG_01311	PGUG_05868	1856402	1852867	4929.XP_001485640.1	4929.XP_001482105.1	0	0	0	0	0.107	0.724	0	0.826	0.953
PGUG_02206	PGUG_03069	1857297	1856102	4929.XP_001486535.1	4929.XP_001485340.1	0.051	0	0	0	0.053	0	0.900	0.542	0.953
PGUG_03061	PGUG_02836	1856094	1855869	4929.XP_001485332.1	4929.XP_001485107.1	0	0	0	0	0	0	0.800	0.778	0.953
PGUG_00716	PGUG_01405	1858101	1856496	4929.XP_001487339.1	4929.XP_001485734.1	0.199	0	0	0	0.754	0	0	0.782	0.953
PGUG_03772	PGUG_03430	1855153	1854811	4929.XP_001484391.1	4929.XP_001484049.1	0	0	0	0	0.747	0.693	0	0.448	0.953
PGUG_02601	PGUG_03724	1855634	1855105	4929.XP_001484872.1	4929.XP_001484343.1	0	0	0	0	0.058	0	0.800	0.775	0.953
PGUG_00296	PGUG_00237	1857681	1857622	4929.XP_001486919.1	4929.XP_001486860.1	0	0	0	0	0.238	0.743	0	0.781	0.953
PGUG_03558	PGUG_05111	1854939	1853918	4929.XP_001484177.1	4929.XP_001483156.1	0	0	0	0	0.352	0.755	0	0.731	0.953
PGUG_02862	PIF1	1855895	1855685	4929.XP_001485133.1	4929.XP_001484923.1	0.062	0	0	0	0.152	0.536	0	0.888	0.953
PGUG_00485	PGUG_02028	1857870	1857119	4929.XP_001487108.1	4929.XP_001486357.1	0	0	0	0	0.579	0.893	0	0	0.953
PGUG_04127	PGUG_05518	1854160	1853260	4929.XP_001483398.1	4929.XP_001482498.1	0.051	0	0	0	0.617	0	0	0.879	0.952
PGUG_00337	PGUG_03129	1857722	1856162	4929.XP_001486960.1	4929.XP_001485400.1	0	0	0	0	0	0	0.900	0.549	0.952
PGUG_02333	RPS1	1855366	1853516	4929.XP_001484604.1	4929.XP_001482754.1	0	0	0	0	0.719	0.727	0	0.431	0.952
DBP10	PGUG_04074	1854247	1854106	4929.XP_001483485.1	4929.XP_001483344.1	0	0	0	0	0.942	0.067	0	0.200	0.952
PGUG_01951	EFT2	1857042	1855945	4929.XP_001486280.1	4929.XP_001485183.1	0.065	0	0	0	0.739	0.810	0	0.101	0.952
PGUG_00503	PGUG_01951	1857888	1857042	4929.XP_001487126.1	4929.XP_001486280.1	0.098	0	0	0	0.716	0.724	0	0.406	0.952
PGUG_00142	PGUG_04648	1857527	1853455	4929.XP_001486765.1	4929.XP_001482693.1	0.098	0	0	0	0.154	0	0.900	0.452	0.952
PGUG_00512	PGUG_05006	1857897	1853813	4929.XP_001487135.1	4929.XP_001483051.1	0	0	0	0	0.733	0	0	0.829	0.952
PGUG_00081	PGUG_05561	1857466	1853303	4929.XP_001486704.1	4929.XP_001482541.1	0.053	0	0	0	0.166	0.086	0.900	0.445	0.952
PGUG_00252	PGUG_03430	1857637	1854811	4929.XP_001486875.1	4929.XP_001484049.1	0.060	0	0	0	0.692	0.633	0	0.606	0.952
PGUG_00894	PGUG_03985	1858279	1854018	4929.XP_001487517.1	4929.XP_001483256.1	0.077	0	0	0	0.048	0.156	0.900	0.459	0.952
PGUG_01403	PGUG_04266	1856494	1854300	4929.XP_001485732.1	4929.XP_001483538.1	0	0	0	0	0.210	0	0.900	0.445	0.952
PGUG_00390	PGUG_02229	1857775	1857320	4929.XP_001487013.1	4929.XP_001486558.1	0.175	0	0	0	0.087	0	0.900	0.446	0.952
TIF1	EFT2	1857938	1855945	4929.XP_001487176.1	4929.XP_001485183.1	0	0	0	0	0.736	0.252	0	0.776	0.951
PGUG_00142	PGUG_01501	1857527	1856592	4929.XP_001486765.1	4929.XP_001485830.1	0.098	0	0	0	0.133	0	0.900	0.452	0.951
PGUG_04074	PGUG_05099	1854106	1853906	4929.XP_001483344.1	4929.XP_001483144.1	0	0	0	0	0.930	0.128	0	0.265	0.951
HTA1	PGUG_04809	1858004	1853616	4929.XP_001487242.1	4929.XP_001482854.1	0	0	0	0	0.557	0.727	0	0.631	0.951
PGUG_00365	PGUG_05410	1857750	1853152	4929.XP_001486988.1	4929.XP_001482390.1	0	0	0	0	0.178	0.665	0.600	0.614	0.951
PGUG_01171	TIF6	1858556	1854852	4929.XP_001487794.1	4929.XP_001484090.1	0	0	0.301	0	0.139	0.819	0	0.606	0.951
PGUG_00550	PGUG_05238	1857935	1852980	4929.XP_001487173.1	4929.XP_001482218.1	0.195	0	0	0	0.929	0	0	0.218	0.951
PGUG_00916	PGUG_05718	1858301	1852717	4929.XP_001487539.1	4929.XP_001481955.1	0	0	0	0	0.053	0.672	0	0.856	0.951
PGUG_02057	PGUG_01438	1857148	1856529	4929.XP_001486386.1	4929.XP_001485767.1	0.131	0	0	0	0.634	0.717	0	0.526	0.951
PGUG_03558	PGUG_05919	1854939	1852673	4929.XP_001484177.1	4929.XP_001481911.1	0.219	0	0	0	0	0.708	0	0.802	0.950
PGUG_00240	PGUG_03982	1857625	1854015	4929.XP_001486863.1	4929.XP_001483253.1	0.176	0	0	0	0.659	0.114	0	0.825	0.950
PGUG_02016	PGUG_05017	1857107	1853824	4929.XP_001486345.1	4929.XP_001483062.1	0	0	0	0	0.130	0.759	0	0.782	0.950
PGUG_02766	PGUG_03398	1855799	1854779	4929.XP_001485037.1	4929.XP_001484017.1	0.167	0	0	0	0	0	0.900	0.451	0.950
PGUG_00363	TEF1	1857748	1853951	4929.XP_001486986.1	4929.XP_001483189.1	0	0	0	0	0.693	0.727	0	0.454	0.950
PGUG_01239	PGUG_04804	1856330	1853611	4929.XP_001485568.1	4929.XP_001482849.1	0	0	0	0	0.666	0	0	0.859	0.950
PGUG_01503	PGUG_01239	1856594	1856330	4929.XP_001485832.1	4929.XP_001485568.1	0	0	0	0	0.175	0	0.900	0.450	0.950
PGUG_04085	PGUG_05333	1854118	1853075	4929.XP_001483356.1	4929.XP_001482313.1	0.172	0	0	0	0.045	0	0.900	0.451	0.950
PGUG_03575	PGUG_05419	1854956	1853161	4929.XP_001484194.1	4929.XP_001482399.1	0	0	0	0	0.128	0.817	0	0.709	0.949
PGUG_02539	PGUG_05006	1855572	1853813	4929.XP_001484810.1	4929.XP_001483051.1	0	0	0	0	0.143	0.559	0	0.877	0.949
PGUG_00316	PGUG_05422	1857701	1853164	4929.XP_001486939.1	4929.XP_001482402.1	0	0	0	0	0.905	0.138	0	0.435	0.949
PGUG_00918	PGUG_03074	1858303	1856107	4929.XP_001487541.1	4929.XP_001485345.1	0.163	0	0	0	0.045	0	0.900	0.444	0.949
PGUG_01877	PGUG_02333	1856967	1855366	4929.XP_001486205.1	4929.XP_001484604.1	0.092	0	0	0	0.721	0.727	0	0.353	0.949
PGUG_01401	PGUG_05417	1856492	1853159	4929.XP_001485730.1	4929.XP_001482397.1	0.176	0	0	0	0.354	0.893	0	0.218	0.949
PGUG_01489	PGUG_04813	1856580	1853620	4929.XP_001485818.1	4929.XP_001482858.1	0.083	0	0	0	0.128	0	0.900	0.443	0.949
PGUG_00150	PGUG_02787	1857535	1855820	4929.XP_001486773.1	4929.XP_001485058.1	0.162	0	0	0	0.655	0.049	0.800	0.218	0.949
PGUG_00892	PGUG_02715	1858277	1855748	4929.XP_001487515.1	4929.XP_001484986.1	0	0	0	0	0.046	0.559	0	0.890	0.949
PGUG_01600	PGUG_03307	1856691	1854688	4929.XP_001485929.1	4929.XP_001483926.1	0	0	0	0	0.558	0.809	0	0.445	0.949
PGUG_01505	PGUG_04759	1856596	1853566	4929.XP_001485834.1	4929.XP_001482804.1	0	0	0	0	0.552	0	0	0.892	0.949
PGUG_01483	PGUG_05417	1856574	1853159	4929.XP_001485812.1	4929.XP_001482397.1	0	0	0	0	0.550	0.893	0	0	0.949
PGUG_01489	PGUG_05561	1856580	1853303	4929.XP_001485818.1	4929.XP_001482541.1	0.083	0	0	0	0.128	0	0.900	0.443	0.949
PGUG_00406	PGUG_05630	1857791	1853372	4929.XP_001487029.1	4929.XP_001482610.1	0.089	0.029	0	0	0.254	0.700	0	0.780	0.949
PGUG_02911	PGUG_02603	1855944	1855636	4929.XP_001485182.1	4929.XP_001484874.1	0.176	0	0	0	0.216	0	0.900	0.316	0.949
DRS1	PGUG_05017	1855295	1853824	4929.XP_001484533.1	4929.XP_001483062.1	0	0	0	0	0.919	0.093	0	0.368	0.949
PGUG_04266	PGUG_05358	1854300	1853100	4929.XP_001483538.1	4929.XP_001482338.1	0	0	0	0	0.165	0	0.900	0.448	0.949
PGUG_02797	PGUG_02333	1855830	1855366	4929.XP_001485068.1	4929.XP_001484604.1	0.076	0	0	0	0.719	0.727	0	0.373	0.949
PGUG_00081	PGUG_05814	1857466	1852813	4929.XP_001486704.1	4929.XP_001482051.1	0.048	0	0	0	0.505	0	0.900	0.048	0.949
PGUG_04352	PGUG_04173	1854385	1854206	4929.XP_001483623.1	4929.XP_001483444.1	0	0	0	0	0.054	0.729	0	0.816	0.948
PGUG_03541	PGUG_03356	1854922	1854737	4929.XP_001484160.1	4929.XP_001483975.1	0.219	0	0	0	0.092	0	0.800	0.681	0.948
PGUG_00503	PGUG_02251	1857888	1857342	4929.XP_001487126.1	4929.XP_001486580.1	0.076	0	0	0	0.715	0.724	0	0.379	0.948
PGUG_04960	PGUG_05746	1853767	1852745	4929.XP_001483005.1	4929.XP_001481983.1	0	0	0	0	0.599	0.808	0	0.384	0.948
PGUG_04391	PGUG_05240	1854424	1852982	4929.XP_001483662.1	4929.XP_001482220.1	0.054	0	0	0	0.355	0.050	0.800	0.626	0.948
PGUG_02601	PGUG_05240	1855634	1852982	4929.XP_001484872.1	4929.XP_001482220.1	0	0	0	0	0.058	0	0.800	0.751	0.948
PGUG_01944	PGUG_03973	1857035	1854006	4929.XP_001486273.1	4929.XP_001483244.1	0	0	0	0	0.094	0	0.900	0.473	0.948
PGUG_00503	PGUG_02545	1857888	1855578	4929.XP_001487126.1	4929.XP_001484816.1	0.098	0	0	0	0.716	0.724	0	0.360	0.948
PGUG_00442	PGUG_04520	1857827	1854553	4929.XP_001487065.1	4929.XP_001483791.1	0	0	0	0	0.729	0.762	0	0.254	0.947
PGUG_03817	PGUG_04946	1855198	1853753	4929.XP_001484436.1	4929.XP_001482991.1	0.207	0	0	0	0.078	0	0.900	0.372	0.947
PGUG_05560	PGUG_05535	1853302	1853277	4929.XP_001482540.1	4929.XP_001482515.1	0.219	0	0	0	0.061	0	0.900	0.372	0.947
PGUG_04934	PGUG_04774	1853741	1853581	4929.XP_001482979.1	4929.XP_001482819.1	0	0	0	0	0.696	0.451	0	0.709	0.947
PGUG_00503	PGUG_04408	1857888	1854441	4929.XP_001487126.1	4929.XP_001483679.1	0	0	0	0	0.716	0.724	0	0.383	0.947
PGUG_02542	PGUG_02541	1855575	1855574	4929.XP_001484813.1	4929.XP_001484812.1	0	0	0	0	0.124	0.741	0	0.787	0.947
PGUG_00081	PGUG_03175	1857466	1856208	4929.XP_001486704.1	4929.XP_001485446.1	0	0	0	0	0.046	0.111	0.900	0.450	0.947
PGUG_02333	PGUG_04476	1855366	1854509	4929.XP_001484604.1	4929.XP_001483747.1	0	0	0	0	0.719	0.727	0	0.368	0.947
PGUG_04935	PGUG_04774	1853742	1853581	4929.XP_001482980.1	4929.XP_001482819.1	0	0	0	0	0.696	0.451	0	0.709	0.947
PGUG_01002	PGUG_02101	1858387	1857192	4929.XP_001487625.1	4929.XP_001486430.1	0.095	0	0	0	0.097	0	0.900	0.430	0.947
PGUG_00307	PGUG_05294	1857692	1853036	4929.XP_001486930.1	4929.XP_001482274.1	0	0	0	0	0.108	0	0.800	0.731	0.947
PGUG_01683	PGUG_01408	1856774	1856499	4929.XP_001486012.1	4929.XP_001485737.1	0.064	0	0	0	0.720	0.269	0	0.759	0.947
PAB1	PGUG_05718	1854355	1852717	4929.XP_001483593.1	4929.XP_001481955.1	0	0	0	0	0.074	0.532	0	0.889	0.947
PGUG_00638	PGUG_00081	1858023	1857466	4929.XP_001487261.1	4929.XP_001486704.1	0	0	0	0	0.046	0.111	0.900	0.450	0.947
PGUG_00671	PGUG_02134	1858056	1857225	4929.XP_001487294.1	4929.XP_001486463.1	0	0	0	0	0.119	0	0.900	0.456	0.947
PGUG_01877	PGUG_01483	1856967	1856574	4929.XP_001486205.1	4929.XP_001485812.1	0	0	0	0	0.737	0.807	0	0.044	0.947
PGUG_03437	MET3	1854818	1853890	4929.XP_001484056.1	4929.XP_001483128.1	0	0	0	0	0	0.501	0.900	0	0.947
PGUG_04321	PGUG_04266	1854354	1854300	4929.XP_001483592.1	4929.XP_001483538.1	0	0	0	0	0.138	0	0.900	0.424	0.946
PGUG_01147	PGUG_04828	1858532	1853635	4929.XP_001487770.1	4929.XP_001482873.1	0.429	0	0	0	0.247	0	0	0.886	0.946
PGUG_00901	PGUG_03816	1858286	1855197	4929.XP_001487524.1	4929.XP_001484435.1	0	0	0	0	0.929	0.279	0	0	0.946
PGUG_01951	PGUG_02333	1857042	1855366	4929.XP_001486280.1	4929.XP_001484604.1	0.076	0	0	0	0.719	0.727	0	0.332	0.946
PGUG_01007	PGUG_00503	1858392	1857888	4929.XP_001487630.1	4929.XP_001487126.1	0	0	0	0	0.716	0.724	0	0.371	0.946
PGUG_01364	PGUG_02400	1856455	1855434	4929.XP_001485693.1	4929.XP_001484672.1	0.219	0	0	0	0.053	0	0.900	0.364	0.946
PGUG_01877	PGUG_01401	1856967	1856492	4929.XP_001486205.1	4929.XP_001485730.1	0.219	0	0	0	0.248	0.893	0	0.255	0.946
HAM1	PGUG_04001	1855702	1854034	4929.XP_001484940.1	4929.XP_001483272.1	0.169	0	0	0	0.054	0.272	0.900	0.215	0.946
HTB1	PGUG_04809	1854823	1853616	4929.XP_001484061.1	4929.XP_001482854.1	0	0.002	0	0	0.513	0.727	0	0.632	0.946
PGUG_00918	PGUG_02674	1858303	1855707	4929.XP_001487541.1	4929.XP_001484945.1	0.063	0	0	0	0.055	0.067	0.900	0.457	0.946
PGUG_02732	PGUG_04079	1855765	1854112	4929.XP_001485003.1	4929.XP_001483350.1	0	0	0	0	0.709	0.747	0	0.336	0.946
PGUG_00503	RPS0	1857888	1855403	4929.XP_001487126.1	4929.XP_001484641.1	0.095	0	0	0	0.716	0.724	0	0.336	0.946
PGUG_01802	PGUG_05578	1856893	1853320	4929.XP_001486131.1	4929.XP_001482558.1	0	0	0	0	0.139	0.733	0	0.780	0.945
PGUG_00503	PGUG_00379	1857888	1857765	4929.XP_001487126.1	4929.XP_001487003.1	0.089	0	0	0	0.716	0.724	0	0.321	0.945
PGUG_00939	PGUG_05628	1858324	1853370	4929.XP_001487562.1	4929.XP_001482608.1	0.173	0	0	0	0.053	0	0.900	0.385	0.945
TEF1	RPS1	1853951	1853516	4929.XP_001483189.1	4929.XP_001482754.1	0	0	0	0	0.679	0.727	0	0.430	0.945
PGUG_02996	PGUG_02674	1856029	1855707	4929.XP_001485267.1	4929.XP_001484945.1	0.056	0	0	0	0	0.255	0.900	0.312	0.945
ADI1	MRI1	1855353	1853738	4929.XP_001484591.1	4929.XP_001482976.1	0.219	0	0.318	0	0.083	0.129	0	0.892	0.945
PGUG_02105	PGUG_01824	1857196	1856915	4929.XP_001486434.1	4929.XP_001486153.1	0.162	0	0	0.561	0.240	0.068	0.900	0.447	0.945
PGUG_01912	PGUG_01911	1857003	1857002	4929.XP_001486241.1	4929.XP_001486240.1	0	0.900	0.479	0	0	0	0	0	0.945
PGUG_02057	PGUG_01683	1857148	1856774	4929.XP_001486386.1	4929.XP_001486012.1	0	0	0	0	0.734	0.067	0	0.797	0.945
PGUG_00965	PGUG_00833	1858350	1858218	4929.XP_001487588.1	4929.XP_001487456.1	0	0	0	0	0.045	0.066	0.900	0.457	0.945
PGUG_00918	HAM1	1858303	1855702	4929.XP_001487541.1	4929.XP_001484940.1	0.181	0	0	0	0.097	0.084	0.900	0.320	0.945
PGUG_03763	PGUG_03757	1855144	1855138	4929.XP_001484382.1	4929.XP_001484376.1	0.042	0	0	0	0.089	0	0.900	0.445	0.945
PGUG_00307	PGUG_01489	1857692	1856580	4929.XP_001486930.1	4929.XP_001485818.1	0.054	0	0	0	0.057	0.056	0.900	0.456	0.945
PGUG_01171	PGUG_00503	1858556	1857888	4929.XP_001487794.1	4929.XP_001487126.1	0.076	0	0	0	0.716	0.724	0	0.333	0.945
PGUG_01180	PGUG_02603	1858565	1855636	4929.XP_001487803.1	4929.XP_001484874.1	0.096	0	0	0	0.050	0	0.900	0.445	0.945
PGUG_00379	PGUG_02333	1857765	1855366	4929.XP_001487003.1	4929.XP_001484604.1	0.060	0	0	0	0.719	0.727	0	0.332	0.945
EFT2	PGUG_02797	1855945	1855830	4929.XP_001485183.1	4929.XP_001485068.1	0	0	0	0	0.684	0.832	0	0.049	0.945
PGUG_02624	PGUG_04324	1855657	1854357	4929.XP_001484895.1	4929.XP_001483595.1	0	0	0	0	0.527	0.882	0	0.098	0.945
PGUG_00947	PGUG_05305	1858332	1853047	4929.XP_001487570.1	4929.XP_001482285.1	0	0	0	0	0.095	0.547	0	0.876	0.944
PGUG_00345	SPB1	1857730	1854816	4929.XP_001486968.1	4929.XP_001484054.1	0.065	0	0	0	0.737	0.264	0	0.731	0.944
HCR1	PGUG_04324	1856003	1854357	4929.XP_001485241.1	4929.XP_001483595.1	0	0	0	0	0.224	0.733	0	0.753	0.944
PGUG_00465	PGUG_01802	1857850	1856893	4929.XP_001487088.1	4929.XP_001486131.1	0	0	0	0	0.135	0.737	0	0.777	0.944
PGUG_03415	PGUG_04243	1854796	1854276	4929.XP_001484034.1	4929.XP_001483514.1	0.077	0	0	0	0.683	0.085	0	0.816	0.944
PGUG_01390	PGUG_05535	1856481	1853277	4929.XP_001485719.1	4929.XP_001482515.1	0.188	0	0	0	0	0	0.900	0.372	0.944
PGUG_00032	ACT1	1857417	1853342	4929.XP_001486655.1	4929.XP_001482580.1	0	0	0	0	0.054	0.569	0	0.874	0.944
PGUG_02173	PGUG_01824	1857264	1856915	4929.XP_001486502.1	4929.XP_001486153.1	0.162	0.003	0	0	0.240	0.068	0.900	0.214	0.944
RPS0	PGUG_02333	1855403	1855366	4929.XP_001484641.1	4929.XP_001484604.1	0.076	0	0	0	0.719	0.727	0	0.305	0.944
PGUG_02545	TIF6	1855578	1854852	4929.XP_001484816.1	4929.XP_001484090.1	0	0	0.207	0	0.147	0.807	0	0.627	0.944
SPB4	PGUG_05099	1855458	1853906	4929.XP_001484696.1	4929.XP_001483144.1	0	0	0	0	0.927	0.268	0	0	0.944
PGUG_03140	PGUG_02477	1856173	1855510	4929.XP_001485411.1	4929.XP_001484748.1	0.064	0	0	0	0.097	0.115	0.900	0.368	0.944
PGUG_03060	PGUG_04562	1856093	1854595	4929.XP_001485331.1	4929.XP_001483833.1	0.060	0	0	0	0	0	0.900	0.461	0.944
PGUG_02333	PGUG_05491	1855366	1853233	4929.XP_001484604.1	4929.XP_001482471.1	0.076	0	0	0	0.719	0.727	0	0.304	0.944
PGUG_01829	PGUG_04960	1856920	1853767	4929.XP_001486158.1	4929.XP_001483005.1	0	0	0	0	0.124	0.746	0	0.770	0.944
PGUG_01797	PGUG_02458	1856888	1855491	4929.XP_001486126.1	4929.XP_001484729.1	0.080	0	0	0	0.098	0.090	0.900	0.368	0.943
PGUG_02458	PGUG_03620	1855491	1855001	4929.XP_001484729.1	4929.XP_001484239.1	0.080	0	0	0	0.098	0.090	0.900	0.368	0.943
PGUG_02333	PGUG_03638	1855366	1855018	4929.XP_001484604.1	4929.XP_001484256.1	0.053	0	0	0	0.719	0.727	0	0.308	0.943
PGUG_02028	PGUG_04832	1857119	1853639	4929.XP_001486357.1	4929.XP_001482877.1	0	0	0	0	0.719	0.732	0	0.304	0.943
PGUG_01598	EFT2	1856689	1855945	4929.XP_001485927.1	4929.XP_001485183.1	0.045	0	0	0	0.553	0.083	0	0.872	0.943
PGUG_01057	PGUG_04122	1858442	1854155	4929.XP_001487680.1	4929.XP_001483393.1	0	0	0	0	0.094	0.813	0	0.694	0.943
PGUG_03033	PGUG_04839	1856066	1853646	4929.XP_001485304.1	4929.XP_001482884.1	0	0	0	0	0.078	0.665	0	0.833	0.943
PGUG_04088	PGUG_05017	1854121	1853824	4929.XP_001483359.1	4929.XP_001483062.1	0	0	0	0	0.927	0.052	0	0.253	0.943
PGUG_00514	PGUG_01364	1857899	1856455	4929.XP_001487137.1	4929.XP_001485693.1	0.219	0	0.417	0	0.593	0	0	0.731	0.943
RBK1	PGUG_05295	1855802	1853037	4929.XP_001485040.1	4929.XP_001482275.1	0	0	0	0	0.043	0.066	0.900	0.445	0.943
PGUG_00939	PGUG_03140	1858324	1856173	4929.XP_001487562.1	4929.XP_001485411.1	0.176	0	0	0	0.603	0.109	0	0.830	0.943
PGUG_00406	PGUG_01914	1857791	1857005	4929.XP_001487029.1	4929.XP_001486243.1	0.053	0	0	0	0.129	0.727	0	0.777	0.943
PGUG_01408	PGUG_04310	1856499	1854343	4929.XP_001485737.1	4929.XP_001483581.1	0	0	0	0	0.738	0.088	0	0.782	0.943
PGUG_00240	PGUG_02272	1857625	1857363	4929.XP_001486863.1	4929.XP_001486601.1	0	0	0	0	0.119	0.107	0.900	0.370	0.943
PGUG_01035	PGUG_02603	1858420	1855636	4929.XP_001487658.1	4929.XP_001484874.1	0.042	0	0	0	0.043	0	0.900	0.454	0.943
PGUG_01988	PGUG_03110	1857079	1856143	4929.XP_001486317.1	4929.XP_001485381.1	0	0	0	0	0	0.882	0	0.539	0.943
PGUG_00470	EFT2	1857855	1855945	4929.XP_001487093.1	4929.XP_001485183.1	0.045	0	0	0	0.553	0.083	0	0.872	0.943
PGUG_01867	PGUG_02918	1856958	1855951	4929.XP_001486196.1	4929.XP_001485189.1	0.063	0	0	0	0.211	0	0.900	0.323	0.943
PGUG_01891	PGUG_02333	1856982	1855366	4929.XP_001486220.1	4929.XP_001484604.1	0.054	0	0	0	0.719	0.727	0	0.303	0.942
PGUG_01430	PGUG_01408	1856521	1856499	4929.XP_001485759.1	4929.XP_001485737.1	0.055	0	0	0	0.267	0.669	0	0.780	0.942
PGUG_01035	PGUG_02101	1858420	1857192	4929.XP_001487658.1	4929.XP_001486430.1	0	0	0	0	0.047	0	0.900	0.448	0.942
PGUG_02134	PGUG_02601	1857225	1855634	4929.XP_001486463.1	4929.XP_001484872.1	0	0	0	0	0.043	0	0.900	0.446	0.942
PGUG_00779	PGUG_03800	1858164	1855181	4929.XP_001487402.1	4929.XP_001484419.1	0	0	0	0	0.066	0.737	0	0.783	0.942
PGUG_00414	PGUG_01914	1857799	1857005	4929.XP_001487037.1	4929.XP_001486243.1	0.053	0	0	0	0.352	0.696	0	0.729	0.942
PGUG_02042	PGUG_05513	1857133	1853255	4929.XP_001486371.1	4929.XP_001482493.1	0	0	0	0	0.045	0	0.900	0.445	0.942
PGUG_03817	PGUG_04001	1855198	1854034	4929.XP_001484436.1	4929.XP_001483272.1	0.176	0	0	0	0.200	0	0.900	0.237	0.942
PGUG_02805	PGUG_05294	1855838	1853036	4929.XP_001485076.1	4929.XP_001482274.1	0	0	0	0	0.574	0.066	0.800	0.366	0.942
HAM1	PGUG_04041	1855702	1854074	4929.XP_001484940.1	4929.XP_001483312.1	0.163	0	0	0	0.054	0	0.900	0.363	0.942
PGUG_00337	PGUG_03186	1857722	1856219	4929.XP_001486960.1	4929.XP_001485457.1	0	0	0	0	0	0	0.900	0.445	0.942
PGUG_03738	PGUG_05428	1855119	1853170	4929.XP_001484357.1	4929.XP_001482408.1	0	0	0	0	0.085	0.095	0.900	0.385	0.942
PGUG_00406	PGUG_02395	1857791	1855428	4929.XP_001487029.1	4929.XP_001484666.1	0.089	0	0	0	0.734	0	0	0.780	0.942
PGUG_02996	PGUG_02836	1856029	1855869	4929.XP_001485267.1	4929.XP_001485107.1	0	0	0	0	0	0	0.900	0.445	0.942
PGUG_00142	PGUG_04085	1857527	1854118	4929.XP_001486765.1	4929.XP_001483356.1	0.176	0	0	0.625	0.179	0	0.900	0.597	0.942
PGUG_05630	PGUG_05518	1853372	1853260	4929.XP_001482610.1	4929.XP_001482498.1	0	0	0	0	0.731	0.350	0	0.697	0.942
PGUG_02981	PGUG_05238	1856014	1852980	4929.XP_001485252.1	4929.XP_001482218.1	0	0	0	0	0.924	0	0	0.275	0.942
PGUG_00965	PGUG_02134	1858350	1857225	4929.XP_001487588.1	4929.XP_001486463.1	0	0	0	0	0.043	0	0.900	0.446	0.942
PGUG_00031	SPB1	1857416	1854816	4929.XP_001486654.1	4929.XP_001484054.1	0	0	0	0	0.940	0	0	0.082	0.942
PGUG_02279	PGUG_01449	1857370	1856540	4929.XP_001486608.1	4929.XP_001485778.1	0	0	0	0	0.497	0.724	0	0.614	0.941
PGUG_03596	PGUG_04538	1854977	1854571	4929.XP_001484215.1	4929.XP_001483809.1	0	0	0	0	0.355	0.844	0	0.469	0.941
PGUG_00965	PGUG_03724	1858350	1855105	4929.XP_001487588.1	4929.XP_001484343.1	0	0	0	0	0.058	0	0.800	0.712	0.941
PGUG_01449	PGUG_02541	1856540	1855574	4929.XP_001485778.1	4929.XP_001484812.1	0	0	0	0	0.095	0.734	0	0.776	0.941
PGUG_00691	PGUG_03043	1858075	1856076	4929.XP_001487313.1	4929.XP_001485314.1	0.060	0	0	0	0.603	0	0	0.856	0.941
PGUG_00383	PGUG_04832	1857768	1853639	4929.XP_001487006.1	4929.XP_001482877.1	0	0	0	0	0.719	0.727	0	0.304	0.941
PGUG_00691	PGUG_01683	1858075	1856774	4929.XP_001487313.1	4929.XP_001486012.1	0.044	0	0	0	0.736	0.133	0	0.763	0.941
PGUG_01364	PGUG_04828	1856455	1853635	4929.XP_001485693.1	4929.XP_001482873.1	0.429	0	0	0	0.126	0	0	0.892	0.941
PGUG_00081	PGUG_04813	1857466	1853620	4929.XP_001486704.1	4929.XP_001482858.1	0.053	0	0	0	0.166	0.086	0.900	0.306	0.940
PGUG_04670	PGUG_05605	1853477	1853347	4929.XP_001482715.1	4929.XP_001482585.1	0	0	0	0	0.539	0.692	0	0.617	0.940
PGUG_01891	PGUG_04832	1856982	1853639	4929.XP_001486220.1	4929.XP_001482877.1	0.098	0	0	0	0.719	0.727	0	0.238	0.940
PGUG_03483	PGUG_05250	1854864	1852992	4929.XP_001484102.1	4929.XP_001482230.1	0	0	0	0	0.045	0.665	0.800	0.176	0.940
RKI1	PGUG_05295	1857118	1853037	4929.XP_001486356.1	4929.XP_001482275.1	0.176	0	0	0	0.054	0	0.900	0.327	0.940
PGUG_00111	PGUG_00081	1857496	1857466	4929.XP_001486734.1	4929.XP_001486704.1	0	0	0	0	0.365	0.124	0.900	0.055	0.940
PGUG_02057	PGUG_03636	1857148	1855017	4929.XP_001486386.1	4929.XP_001484255.1	0.047	0	0	0	0.737	0	0	0.780	0.940
PGUG_01408	PGUG_03043	1856499	1856076	4929.XP_001485737.1	4929.XP_001485314.1	0.052	0	0	0	0.246	0.670	0	0.778	0.940
PGUG_01505	PGUG_03626	1856596	1855007	4929.XP_001485834.1	4929.XP_001484245.1	0.329	0	0	0	0.243	0	0	0.892	0.940
PGUG_00918	PGUG_00550	1858303	1857935	4929.XP_001487541.1	4929.XP_001487173.1	0.051	0	0	0	0.126	0	0.900	0.372	0.940
PGUG_03700	PGUG_04324	1855081	1854357	4929.XP_001484319.1	4929.XP_001483595.1	0	0	0	0	0.131	0.887	0	0.444	0.940
PGUG_02101	PGUG_04648	1857192	1853455	4929.XP_001486430.1	4929.XP_001482693.1	0.098	0	0	0	0.651	0.067	0	0.820	0.940
PGUG_00961	PGUG_04538	1858346	1854571	4929.XP_001487584.1	4929.XP_001483809.1	0	0	0	0	0.590	0.830	0	0.215	0.940
PGUG_01877	TUF1	1856967	1853536	4929.XP_001486205.1	4929.XP_001482774.1	0.219	0	0	0	0.603	0.689	0	0.447	0.939
PGUG_02222	PGUG_04817	1857313	1853624	4929.XP_001486551.1	4929.XP_001482862.1	0	0	0	0	0.061	0.735	0	0.778	0.939
PGUG_02476	PGUG_04428	1855509	1854461	4929.XP_001484747.1	4929.XP_001483699.1	0	0	0	0	0.049	0.665	0	0.826	0.939
PGUG_02057	PGUG_01914	1857148	1857005	4929.XP_001486386.1	4929.XP_001486243.1	0	0	0	0	0.603	0.724	0	0.492	0.939
PGUG_01317	PGUG_01282	1856408	1856373	4929.XP_001485646.1	4929.XP_001485611.1	0.098	0	0	0	0.061	0.258	0.800	0.590	0.939
PGUG_02251	EFT2	1857342	1855945	4929.XP_001486580.1	4929.XP_001485183.1	0.054	0	0	0	0.625	0.841	0	0.055	0.939
PGUG_01683	PGUG_05629	1856774	1853371	4929.XP_001486012.1	4929.XP_001482609.1	0.053	0	0	0	0.737	0	0	0.778	0.939
PGUG_03003	PGUG_04024	1856036	1854057	4929.XP_001485274.1	4929.XP_001483295.1	0.219	0	0	0	0.045	0.095	0.900	0.239	0.939
PGUG_00939	PGUG_03757	1858324	1855138	4929.XP_001487562.1	4929.XP_001484376.1	0	0	0	0	0	0	0.800	0.709	0.939
PGUG_04935	PGUG_05604	1853742	1853346	4929.XP_001482980.1	4929.XP_001482584.1	0	0.756	0.477	0	0.208	0.263	0	0.312	0.939
ALA1	PGUG_02057	1857608	1857148	4929.XP_001486846.1	4929.XP_001486386.1	0.064	0	0	0	0.603	0.359	0	0.775	0.939
PGUG_01007	PGUG_05290	1858392	1853032	4929.XP_001487630.1	4929.XP_001482270.1	0	0	0	0	0.450	0.893	0	0.049	0.939
PGUG_00307	PGUG_04804	1857692	1853611	4929.XP_001486930.1	4929.XP_001482849.1	0.219	0	0	0	0.235	0	0	0.906	0.939
PGUG_01944	PGUG_04679	1857035	1853486	4929.XP_001486273.1	4929.XP_001482724.1	0	0	0	0	0.097	0.068	0.900	0.364	0.939
PGUG_04255	PGUG_04254	1854289	1854288	4929.XP_001483527.1	4929.XP_001483526.1	0	0.900	0.417	0	0	0	0	0	0.939
PGUG_03114	PGUG_05868	1856147	1852867	4929.XP_001485385.1	4929.XP_001482105.1	0	0	0	0	0.064	0.724	0	0.783	0.939
PGUG_01282	PGUG_04596	1856373	1854629	4929.XP_001485611.1	4929.XP_001483867.1	0.098	0	0	0	0.061	0.258	0.800	0.590	0.939
PGUG_03331	PGUG_04562	1854712	1854595	4929.XP_001483950.1	4929.XP_001483833.1	0.054	0	0	0	0	0	0.900	0.408	0.939
PGUG_01430	PGUG_04127	1856521	1854160	4929.XP_001485759.1	4929.XP_001483398.1	0	0	0	0	0.737	0.124	0	0.757	0.939
PGUG_02240	PGUG_03175	1857331	1856208	4929.XP_001486569.1	4929.XP_001485446.1	0	0.002	0	0	0.097	0	0.900	0.376	0.938
PGUG_01171	PGUG_03256	1858556	1856289	4929.XP_001487794.1	4929.XP_001485527.1	0	0	0	0	0.929	0.050	0	0.160	0.938
PGUG_04085	PGUG_04648	1854118	1853455	4929.XP_001483356.1	4929.XP_001482693.1	0.080	0	0	0	0.045	0	0.900	0.382	0.938
PGUG_00638	PGUG_01281	1858023	1856372	4929.XP_001487261.1	4929.XP_001485610.1	0	0.002	0	0	0.097	0	0.900	0.376	0.938
PGUG_03990	PGUG_04832	1854023	1853639	4929.XP_001483261.1	4929.XP_001482877.1	0.098	0	0	0	0.719	0.727	0	0.216	0.938
PGUG_04353	PGUG_04809	1854386	1853616	4929.XP_001483624.1	4929.XP_001482854.1	0	0	0	0	0.042	0.893	0	0.444	0.938
PGUG_02539	PGUG_04832	1855572	1853639	4929.XP_001484810.1	4929.XP_001482877.1	0.098	0	0	0	0.736	0.727	0	0.165	0.938
PGUG_02333	PGUG_04739	1855366	1853546	4929.XP_001484604.1	4929.XP_001482784.1	0	0	0	0	0.719	0.727	0	0.260	0.938
PGUG_00414	PGUG_02829	1857799	1855862	4929.XP_001487037.1	4929.XP_001485100.1	0.145	0	0	0	0.208	0.279	0	0.889	0.938
PGUG_03724	PGUG_05240	1855105	1852982	4929.XP_001484343.1	4929.XP_001482220.1	0	0	0	0	0.051	0	0.800	0.703	0.938
PGUG_01379	PGUG_01325	1856470	1856416	4929.XP_001485708.1	4929.XP_001485654.1	0.076	0	0	0	0.128	0.055	0.900	0.313	0.938
PGUG_02062	PGUG_03389	1857153	1854770	4929.XP_001486391.1	4929.XP_001484008.1	0	0	0	0	0.134	0.660	0	0.809	0.938
PGUG_04207	PGUG_04832	1854240	1853639	4929.XP_001483478.1	4929.XP_001482877.1	0	0	0	0	0.719	0.727	0	0.259	0.938
PGUG_04832	PGUG_05417	1853639	1853159	4929.XP_001482877.1	4929.XP_001482397.1	0	0	0	0	0.736	0.734	0	0.189	0.938
EFT2	PGUG_05491	1855945	1853233	4929.XP_001485183.1	4929.XP_001482471.1	0.065	0	0.233	0	0.345	0.846	0	0.279	0.938
PGUG_01281	PGUG_03175	1856372	1856208	4929.XP_001485610.1	4929.XP_001485446.1	0	0.002	0	0	0.097	0	0.900	0.376	0.938
HAM1	PGUG_03817	1855702	1855198	4929.XP_001484940.1	4929.XP_001484436.1	0.049	0	0	0	0.053	0	0.900	0.397	0.938
PGUG_00476	PGUG_04828	1857861	1853635	4929.XP_001487099.1	4929.XP_001482873.1	0.429	0	0	0	0.080	0	0	0.892	0.938
PGUG_04085	PGUG_05584	1854118	1853326	4929.XP_001483356.1	4929.XP_001482564.1	0.176	0	0	0	0.045	0.089	0.900	0.280	0.938
PGUG_01683	PGUG_03043	1856774	1856076	4929.XP_001486012.1	4929.XP_001485314.1	0	0	0	0	0.736	0.146	0	0.749	0.938
PGUG_00638	PGUG_02240	1858023	1857331	4929.XP_001487261.1	4929.XP_001486569.1	0	0.002	0	0	0.097	0	0.900	0.376	0.938
PGUG_02624	PGUG_02333	1855657	1855366	4929.XP_001484895.1	4929.XP_001484604.1	0.095	0	0	0	0.719	0.727	0	0.215	0.938
PGUG_00979	PGUG_00756	1858364	1858141	4929.XP_001487602.1	4929.XP_001487379.1	0	0	0	0	0.609	0.844	0	0.059	0.937
PGUG_00406	PGUG_02829	1857791	1855862	4929.XP_001487029.1	4929.XP_001485100.1	0.145	0	0	0	0.208	0.279	0	0.887	0.937
PGUG_00503	PGUG_02744	1857888	1855777	4929.XP_001487126.1	4929.XP_001485015.1	0.095	0	0	0	0.716	0.724	0	0.217	0.937
RPS0	PGUG_04832	1855403	1853639	4929.XP_001484641.1	4929.XP_001482877.1	0	0	0	0	0.730	0.727	0	0.216	0.937
PGUG_00252	PGUG_04088	1857637	1854121	4929.XP_001486875.1	4929.XP_001483359.1	0	0	0	0	0.647	0.707	0	0.447	0.937
PGUG_02261	PGUG_02477	1857352	1855510	4929.XP_001486590.1	4929.XP_001484748.1	0.054	0	0	0	0.049	0.068	0.900	0.368	0.937
PGUG_00514	PGUG_04828	1857899	1853635	4929.XP_001487137.1	4929.XP_001482873.1	0.429	0	0.322	0	0.247	0	0	0.811	0.937
PGUG_03596	PGUG_04817	1854977	1853624	4929.XP_001484215.1	4929.XP_001482862.1	0	0	0	0	0.736	0.754	0	0.119	0.937
PGUG_01379	MET3	1856470	1853890	4929.XP_001485708.1	4929.XP_001483128.1	0	0	0	0	0.480	0	0	0.885	0.937
PGUG_01877	PGUG_01576	1856967	1856667	4929.XP_001486205.1	4929.XP_001485905.1	0.176	0	0.251	0	0.600	0.719	0	0.237	0.937
PGUG_01401	PGUG_05491	1856492	1853233	4929.XP_001485730.1	4929.XP_001482471.1	0.176	0	0	0	0.246	0.893	0	0.177	0.937
PGUG_00901	PGUG_04067	1858286	1854100	4929.XP_001487524.1	4929.XP_001483338.1	0	0	0	0	0.737	0.694	0	0.287	0.937
PGUG_02981	PGUG_02674	1856014	1855707	4929.XP_001485252.1	4929.XP_001484945.1	0	0	0	0	0.046	0	0.900	0.398	0.937
PGUG_01133	PGUG_05422	1858518	1853164	4929.XP_001487756.1	4929.XP_001482402.1	0	0	0	0	0.736	0.257	0	0.708	0.937
PGUG_01737	PGUG_01253	1856828	1856344	4929.XP_001486066.1	4929.XP_001485582.1	0	0	0	0	0.046	0.661	0	0.821	0.937
PGUG_00979	PGUG_04960	1858364	1853767	4929.XP_001487602.1	4929.XP_001483005.1	0	0	0	0	0.634	0.809	0	0.161	0.936
PGUG_04173	PGUG_04754	1854206	1853561	4929.XP_001483444.1	4929.XP_001482799.1	0	0	0	0	0	0.728	0	0.775	0.936
PGUG_01282	PGUG_04679	1856373	1853486	4929.XP_001485611.1	4929.XP_001482724.1	0.062	0	0	0	0.101	0	0.900	0.333	0.936
PGUG_00081	PGUG_04681	1857466	1853488	4929.XP_001486704.1	4929.XP_001482726.1	0	0	0	0	0.045	0.257	0.900	0.215	0.936
EFT2	PGUG_03700	1855945	1855081	4929.XP_001485183.1	4929.XP_001484319.1	0	0	0	0	0.640	0.830	0	0.049	0.936
PGUG_01401	PGUG_05887	1856492	1852886	4929.XP_001485730.1	4929.XP_001482124.1	0	0	0	0	0.211	0.728	0	0.729	0.936
PGUG_00901	PGUG_00379	1858286	1857765	4929.XP_001487524.1	4929.XP_001487003.1	0	0	0	0	0.736	0.661	0	0.351	0.936
PGUG_01430	PGUG_03636	1856521	1855017	4929.XP_001485759.1	4929.XP_001484255.1	0.166	0	0	0	0.734	0.136	0	0.709	0.936
PGUG_01083	PGUG_00671	1858468	1858056	4929.XP_001487706.1	4929.XP_001487294.1	0.176	0	0	0	0.087	0	0.900	0.260	0.936
PGUG_02089	EFT2	1857180	1855945	4929.XP_001486418.1	4929.XP_001485183.1	0	0	0	0	0.569	0.841	0	0.147	0.936
PGUG_01384	PGUG_05422	1856475	1853164	4929.XP_001485713.1	4929.XP_001482402.1	0	0	0	0	0.843	0.143	0	0.563	0.936
PGUG_04230	PGUG_05826	1854263	1852825	4929.XP_001483501.1	4929.XP_001482063.1	0.052	0	0	0	0.091	0.762	0	0.727	0.936
PGUG_00150	PGUG_01489	1857535	1856580	4929.XP_001486773.1	4929.XP_001485818.1	0.049	0	0	0	0.113	0	0.900	0.331	0.936
PGUG_01850	PGUG_05581	1856941	1853323	4929.XP_001486179.1	4929.XP_001482561.1	0	0	0.480	0.931	0	0.665	0.800	0.882	0.936
PGUG_02333	PGUG_03990	1855366	1854023	4929.XP_001484604.1	4929.XP_001483261.1	0.064	0	0	0	0.719	0.727	0	0.217	0.936
PGUG_00503	PGUG_02797	1857888	1855830	4929.XP_001487126.1	4929.XP_001485068.1	0	0	0	0	0.715	0.724	0	0.259	0.936
PGUG_00918	PGUG_02981	1858303	1856014	4929.XP_001487541.1	4929.XP_001485252.1	0	0	0	0	0.133	0	0.900	0.324	0.936
TRM8	PGUG_03244	1858213	1856277	4929.XP_001487451.1	4929.XP_001485515.1	0	0	0	0	0.718	0	0	0.779	0.935
PGUG_02744	PGUG_02333	1855777	1855366	4929.XP_001485015.1	4929.XP_001484604.1	0.053	0	0	0	0.719	0.727	0	0.215	0.935
PGUG_02658	PGUG_02333	1855691	1855366	4929.XP_001484929.1	4929.XP_001484604.1	0.054	0	0	0	0.719	0.727	0	0.215	0.935
PGUG_03797	PGUG_03738	1855179	1855119	4929.XP_001484417.1	4929.XP_001484357.1	0.049	0	0	0	0	0	0.900	0.380	0.935
PGUG_00503	PGUG_04739	1857888	1853546	4929.XP_001487126.1	4929.XP_001482784.1	0	0	0	0	0.716	0.724	0	0.242	0.935
PGUG_02624	PGUG_04832	1855657	1853639	4929.XP_001484895.1	4929.XP_001482877.1	0.176	0	0	0	0.719	0.727	0	0.100	0.935
PGUG_01171	PGUG_02333	1858556	1855366	4929.XP_001487794.1	4929.XP_001484604.1	0.054	0	0	0	0.719	0.727	0	0.217	0.935
PGUG_00866	UTP10	1858251	1855581	4929.XP_001487489.1	4929.XP_001484819.1	0	0	0	0	0.251	0.801	0	0.605	0.935
PGUG_01005	PGUG_04562	1858390	1854595	4929.XP_001487628.1	4929.XP_001483833.1	0	0	0	0	0.045	0	0.900	0.378	0.935
PGUG_02836	PGUG_05768	1855869	1852767	4929.XP_001485107.1	4929.XP_001482005.1	0	0	0	0	0	0	0.900	0.381	0.935
PGUG_03430	PGUG_04294	1854811	1854327	4929.XP_001484049.1	4929.XP_001483565.1	0.054	0	0	0	0.929	0	0	0.114	0.935
PGUG_02657	PGUG_03558	1855690	1854939	4929.XP_001484928.1	4929.XP_001484177.1	0	0	0	0	0.043	0.696	0	0.797	0.935
PGUG_01408	PGUG_02829	1856499	1855862	4929.XP_001485737.1	4929.XP_001485100.1	0.051	0	0	0	0.470	0.269	0	0.842	0.934
PGUG_01875	PGUG_02305	1856966	1855338	4929.XP_001486204.1	4929.XP_001484576.1	0.176	0	0	0	0.515	0.268	0	0.802	0.934
PGUG_02126	URE2	1857217	1856536	4929.XP_001486455.1	4929.XP_001485774.1	0	0	0	0	0.252	0.250	0	0.892	0.934
PGUG_01405	PGUG_05295	1856496	1853037	4929.XP_001485734.1	4929.XP_001482275.1	0	0	0	0	0.737	0.117	0	0.740	0.934
PGUG_01951	PGUG_01401	1857042	1856492	4929.XP_001486280.1	4929.XP_001485730.1	0.176	0	0	0	0.209	0.893	0	0.171	0.934
PGUG_02251	PGUG_02333	1857342	1855366	4929.XP_001486580.1	4929.XP_001484604.1	0	0	0	0	0.719	0.727	0	0.216	0.934
PGUG_02797	PGUG_04832	1855830	1853639	4929.XP_001485068.1	4929.XP_001482877.1	0	0	0	0	0.719	0.727	0	0.215	0.934
PGUG_00901	PGUG_01877	1858286	1856967	4929.XP_001487524.1	4929.XP_001486205.1	0	0	0	0	0.708	0.693	0	0.330	0.934
PGUG_03057	PGUG_04713	1856090	1853520	4929.XP_001485328.1	4929.XP_001482758.1	0	0	0	0	0.052	0.088	0.900	0.336	0.934
PGUG_02052	PGUG_01417	1857143	1856508	4929.XP_001486381.1	4929.XP_001485746.1	0.066	0	0	0	0	0	0.900	0.351	0.934
PGUG_00716	HAM1	1858101	1855702	4929.XP_001487339.1	4929.XP_001484940.1	0	0	0	0	0.055	0	0.900	0.359	0.934
PGUG_00716	PGUG_02674	1858101	1855707	4929.XP_001487339.1	4929.XP_001484945.1	0.218	0	0	0	0.046	0.047	0.900	0.217	0.934
PGUG_02658	PGUG_04832	1855691	1853639	4929.XP_001484929.1	4929.XP_001482877.1	0.098	0	0	0	0.719	0.727	0	0.156	0.933
PGUG_00965	PGUG_05240	1858350	1852982	4929.XP_001487588.1	4929.XP_001482220.1	0	0	0	0	0.054	0	0.800	0.675	0.933
PGUG_01171	PGUG_04832	1858556	1853639	4929.XP_001487794.1	4929.XP_001482877.1	0	0	0	0	0.719	0.726	0	0.201	0.933
PGUG_02025	SPB1	1857116	1854816	4929.XP_001486354.1	4929.XP_001484054.1	0	0	0	0	0.924	0.068	0	0.143	0.933
PGUG_02395	PGUG_03636	1855428	1855017	4929.XP_001484666.1	4929.XP_001484255.1	0	0	0	0	0.694	0.095	0	0.780	0.933
PGUG_04266	PGUG_04227	1854300	1854260	4929.XP_001483538.1	4929.XP_001483498.1	0	0	0	0	0.101	0	0.900	0.323	0.933
PGUG_00638	PGUG_03763	1858023	1855144	4929.XP_001487261.1	4929.XP_001484382.1	0	0	0	0	0.043	0.043	0.900	0.357	0.933
PGUG_00081	PGUG_02240	1857466	1857331	4929.XP_001486704.1	4929.XP_001486569.1	0.053	0	0	0	0.053	0.062	0.900	0.336	0.933
PGUG_00503	PGUG_03619	1857888	1855000	4929.XP_001487126.1	4929.XP_001484238.1	0.098	0	0	0	0.716	0.724	0	0.165	0.933
PGUG_01482	PGUG_05333	1856573	1853075	4929.XP_001485811.1	4929.XP_001482313.1	0	0	0	0	0.082	0	0.800	0.666	0.933
PGUG_00442	PGUG_04079	1857827	1854112	4929.XP_001487065.1	4929.XP_001483350.1	0	0	0	0	0.626	0.764	0	0.311	0.933
ALA1	PGUG_01430	1857608	1856521	4929.XP_001486846.1	4929.XP_001485759.1	0.098	0	0	0	0.737	0.350	0	0.621	0.933
PGUG_00503	PGUG_01465	1857888	1856556	4929.XP_001487126.1	4929.XP_001485794.1	0.098	0	0	0	0.716	0.724	0	0.165	0.933
PGUG_04520	PGUG_04817	1854553	1853624	4929.XP_001483791.1	4929.XP_001482862.1	0	0	0	0	0.724	0.759	0	0.081	0.933
PGUG_00190	PGUG_02716	1857575	1855749	4929.XP_001486813.1	4929.XP_001484987.1	0	0	0.480	0.965	0.047	0.665	0.800	0.890	0.933
PGUG_01501	PGUG_04085	1856592	1854118	4929.XP_001485830.1	4929.XP_001483356.1	0.080	0	0	0	0.045	0	0.900	0.334	0.933
PGUG_02450	PGUG_04809	1855483	1853616	4929.XP_001484721.1	4929.XP_001482854.1	0	0	0	0	0.054	0.760	0	0.731	0.933
PGUG_00438	PGUG_03430	1857823	1854811	4929.XP_001487061.1	4929.XP_001484049.1	0	0	0	0	0.933	0	0	0.051	0.933
PGUG_03175	PGUG_03763	1856208	1855144	4929.XP_001485446.1	4929.XP_001484382.1	0	0	0	0	0.043	0.043	0.900	0.357	0.933
PGUG_00014	PGUG_04024	1857399	1854057	4929.XP_001486637.1	4929.XP_001483295.1	0.054	0	0	0	0.244	0	0.900	0.178	0.933
PGUG_01951	PGUG_04832	1857042	1853639	4929.XP_001486280.1	4929.XP_001482877.1	0	0	0	0	0.722	0.727	0	0.199	0.933
PGUG_00081	PGUG_01281	1857466	1856372	4929.XP_001486704.1	4929.XP_001485610.1	0.053	0	0	0	0.053	0.062	0.900	0.336	0.933
PGUG_02539	PGUG_05887	1855572	1852886	4929.XP_001484810.1	4929.XP_001482124.1	0	0	0	0	0.195	0.661	0	0.776	0.933
PGUG_01002	PGUG_03124	1858387	1856157	4929.XP_001487625.1	4929.XP_001485395.1	0	0	0	0	0.212	0.066	0.800	0.602	0.933
PGUG_01875	PGUG_03817	1856966	1855198	4929.XP_001486204.1	4929.XP_001484436.1	0.219	0	0	0	0.736	0.065	0	0.690	0.932
PGUG_01766	PGUG_01765	1856857	1856856	4929.XP_001486095.1	4929.XP_001486094.1	0	0.675	0	0	0	0	0.800	0	0.932
PGUG_01438	PGUG_02743	1856529	1855776	4929.XP_001485767.1	4929.XP_001485014.1	0.176	0	0	0	0.719	0	0	0.731	0.932
PGUG_03003	PGUG_04828	1856036	1853635	4929.XP_001485274.1	4929.XP_001482873.1	0.184	0	0	0	0.046	0	0.900	0.234	0.932
PGUG_00965	PGUG_02601	1858350	1855634	4929.XP_001487588.1	4929.XP_001484872.1	0	0	0.479	0.866	0.249	0.501	0.800	0.890	0.932
PGUG_04213	PGUG_05305	1854246	1853047	4929.XP_001483484.1	4929.XP_001482285.1	0	0	0	0	0.054	0.708	0	0.776	0.932
PGUG_02836	PGUG_04068	1855869	1854101	4929.XP_001485107.1	4929.XP_001483339.1	0	0	0	0	0	0	0.900	0.351	0.932
PGUG_05111	PGUG_05422	1853918	1853164	4929.XP_001483156.1	4929.XP_001482402.1	0	0	0	0	0.669	0.664	0	0.445	0.932
PGUG_03244	SPB1	1856277	1854816	4929.XP_001485515.1	4929.XP_001484054.1	0	0	0	0	0.766	0.133	0	0.693	0.932
PGUG_03256	PGUG_03816	1856289	1855197	4929.XP_001485527.1	4929.XP_001484435.1	0	0	0	0	0.929	0	0	0.086	0.932
PGUG_00055	PGUG_05294	1857440	1853036	4929.XP_001486678.1	4929.XP_001482274.1	0	0	0	0	0.124	0	0.900	0.288	0.932
ALA1	PGUG_03043	1857608	1856076	4929.XP_001486846.1	4929.XP_001485314.1	0.077	0	0	0	0.736	0	0	0.747	0.932
PGUG_02996	PGUG_04041	1856029	1854074	4929.XP_001485267.1	4929.XP_001483312.1	0.054	0	0	0	0.192	0	0.900	0.215	0.931
PGUG_02777	PGUG_05731	1855810	1852730	4929.XP_001485048.1	4929.XP_001481968.1	0.097	0	0	0	0	0	0.900	0.304	0.931
PGUG_01683	PGUG_01430	1856774	1856521	4929.XP_001486012.1	4929.XP_001485759.1	0.049	0	0	0	0.603	0.363	0	0.749	0.931
PGUG_01384	PGUG_05700	1856475	1852698	4929.XP_001485713.1	4929.XP_001481936.1	0	0	0	0	0.737	0.114	0	0.731	0.931
PGUG_03973	PGUG_04679	1854006	1853486	4929.XP_001483244.1	4929.XP_001482724.1	0.176	0	0	0	0.045	0.070	0.800	0.606	0.931
PGUG_00503	PGUG_03700	1857888	1855081	4929.XP_001487126.1	4929.XP_001484319.1	0	0	0	0	0.709	0.724	0	0.218	0.931
TIF6	PGUG_04067	1854852	1854100	4929.XP_001484090.1	4929.XP_001483338.1	0	0	0	0	0.240	0.783	0	0.617	0.931
PGUG_04476	PGUG_05697	1854509	1852696	4929.XP_001483747.1	4929.XP_001481934.1	0	0	0	0	0.096	0.893	0	0.351	0.931
PGUG_00252	PGUG_04074	1857637	1854106	4929.XP_001486875.1	4929.XP_001483344.1	0	0	0	0	0.687	0.451	0	0.633	0.931
PGUG_01914	PGUG_01430	1857005	1856521	4929.XP_001486243.1	4929.XP_001485759.1	0.089	0	0	0	0.288	0.678	0	0.709	0.931
PGUG_00604	PGUG_03331	1857989	1854712	4929.XP_001487227.1	4929.XP_001483950.1	0	0	0	0	0.107	0	0.900	0.295	0.931
PGUG_00638	PGUG_02909	1858023	1855942	4929.XP_001487261.1	4929.XP_001485180.1	0	0	0	0	0.045	0	0.900	0.332	0.930
SPB4	DRS1	1855458	1855295	4929.XP_001484696.1	4929.XP_001484533.1	0	0	0.478	0.674	0.831	0.066	0.360	0.794	0.930
PGUG_00716	PGUG_00638	1858101	1858023	4929.XP_001487339.1	4929.XP_001487261.1	0	0	0	0	0.179	0	0.900	0.216	0.930
RPS1	PGUG_05474	1853516	1853216	4929.XP_001482754.1	4929.XP_001482454.1	0	0	0	0	0.715	0.760	0	0.066	0.930
PGUG_02732	PGUG_05746	1855765	1852745	4929.XP_001485003.1	4929.XP_001481983.1	0	0	0	0	0.674	0.750	0	0.216	0.930
PGUG_04670	PGUG_05604	1853477	1853346	4929.XP_001482715.1	4929.XP_001482584.1	0	0	0	0	0.539	0.692	0	0.553	0.930
PGUG_02261	PGUG_02229	1857352	1857320	4929.XP_001486590.1	4929.XP_001486558.1	0.054	0	0	0	0.042	0.057	0.900	0.315	0.930
PGUG_02074	PGUG_02862	1857165	1855895	4929.XP_001486403.1	4929.XP_001485133.1	0	0	0	0	0.079	0.726	0	0.747	0.930
PGUG_04814	PGUG_04670	1853621	1853477	4929.XP_001482859.1	4929.XP_001482715.1	0	0	0	0	0.539	0.692	0	0.553	0.930
PGUG_01568	PGUG_05305	1856659	1853047	4929.XP_001485897.1	4929.XP_001482285.1	0	0	0	0	0.162	0.338	0	0.885	0.930
EFT2	PGUG_04207	1855945	1854240	4929.XP_001485183.1	4929.XP_001483478.1	0	0	0	0	0.573	0.840	0	0.071	0.930
PGUG_01417	PGUG_03068	1856508	1856101	4929.XP_001485746.1	4929.XP_001485339.1	0	0	0	0	0	0	0.900	0.335	0.930
PGUG_00294	PGUG_04596	1857679	1854629	4929.XP_001486917.1	4929.XP_001483867.1	0.095	0	0	0	0.097	0	0.800	0.625	0.930
PGUG_02229	RBK1	1857320	1855802	4929.XP_001486558.1	4929.XP_001485040.1	0.048	0	0	0	0.071	0	0.900	0.305	0.930
PGUG_04832	PGUG_05491	1853639	1853233	4929.XP_001482877.1	4929.XP_001482471.1	0	0	0	0	0.719	0.733	0	0.143	0.930
PGUG_00345	PGUG_03244	1857730	1856277	4929.XP_001486968.1	4929.XP_001485515.1	0	0	0	0	0.598	0.123	0	0.820	0.930
PGUG_00716	PGUG_03175	1858101	1856208	4929.XP_001487339.1	4929.XP_001485446.1	0	0	0	0	0.179	0	0.900	0.216	0.930
PGUG_00926	PGUG_04335	1858311	1854368	4929.XP_001487549.1	4929.XP_001483606.1	0.084	0	0	0	0.128	0	0.800	0.614	0.930
PGUG_00081	PGUG_02909	1857466	1855942	4929.XP_001486704.1	4929.XP_001485180.1	0.054	0	0	0	0.107	0.114	0.900	0.218	0.930
PGUG_03175	PGUG_02909	1856208	1855942	4929.XP_001485446.1	4929.XP_001485180.1	0	0	0	0	0.045	0	0.900	0.332	0.930
PGUG_03430	PGUG_05474	1854811	1853216	4929.XP_001484049.1	4929.XP_001482454.1	0	0	0	0	0.920	0.150	0	0.066	0.930
PGUG_00294	PGUG_01317	1857679	1856408	4929.XP_001486917.1	4929.XP_001485646.1	0.095	0	0	0	0.097	0	0.800	0.625	0.930
PGUG_04123	PGUG_05245	1854156	1852987	4929.XP_001483394.1	4929.XP_001482225.1	0	0	0	0	0.170	0.715	0	0.731	0.930
PGUG_03823	ACT1	1855204	1853342	4929.XP_001484442.1	4929.XP_001482580.1	0	0	0	0	0.058	0.745	0	0.730	0.929
PGUG_00951	PGUG_00294	1858336	1857679	4929.XP_001487574.1	4929.XP_001486917.1	0.219	0	0	0	0.092	0.194	0	0.891	0.929
PGUG_03638	PGUG_04832	1855018	1853639	4929.XP_001484256.1	4929.XP_001482877.1	0.091	0	0	0	0.719	0.727	0	0.106	0.929
PGUG_02798	PGUG_04832	1855831	1853639	4929.XP_001485069.1	4929.XP_001482877.1	0	0	0	0	0.719	0.727	0	0.157	0.929
PGUG_01891	PGUG_03256	1856982	1856289	4929.XP_001486220.1	4929.XP_001485527.1	0	0	0	0	0.929	0	0	0	0.929
PGUG_01002	PGUG_01379	1858387	1856470	4929.XP_001487625.1	4929.XP_001485708.1	0	0	0.437	0.724	0.045	0	0.900	0.731	0.929
PGUG_03741	PGUG_04804	1855122	1853611	4929.XP_001484360.1	4929.XP_001482849.1	0.096	0	0	0	0	0.055	0.900	0.269	0.929
PGUG_01483	PGUG_02545	1856574	1855578	4929.XP_001485812.1	4929.XP_001484816.1	0	0	0	0	0.832	0.596	0	0	0.929
PGUG_00565	PGUG_00420	1857950	1857805	4929.XP_001487188.1	4929.XP_001487043.1	0	0	0	0	0.109	0.672	0	0.777	0.929
PGUG_01683	PGUG_02395	1856774	1855428	4929.XP_001486012.1	4929.XP_001484666.1	0.049	0	0	0	0.680	0.080	0	0.778	0.929
PGUG_01877	PGUG_03256	1856967	1856289	4929.XP_001486205.1	4929.XP_001485527.1	0	0	0	0	0.929	0	0	0	0.929
PGUG_02078	PGUG_04759	1857169	1853566	4929.XP_001486407.1	4929.XP_001482804.1	0	0	0	0	0.177	0	0.900	0.216	0.929
PGUG_03816	TEF1	1855197	1853951	4929.XP_001484435.1	4929.XP_001483189.1	0	0	0.235	0	0.684	0.727	0	0.063	0.929
PGUG_03698	PGUG_04785	1855080	1853592	4929.XP_001484318.1	4929.XP_001482830.1	0	0	0	0	0.047	0.736	0	0.742	0.929
PGUG_03114	PGUG_02526	1856147	1855559	4929.XP_001485385.1	4929.XP_001484797.1	0	0	0	0	0.069	0.741	0	0.731	0.929
PGUG_03082	PGUG_05887	1856115	1852886	4929.XP_001485353.1	4929.XP_001482124.1	0	0	0	0	0.249	0.261	0	0.884	0.929
PGUG_00918	PGUG_02843	1858303	1855876	4929.XP_001487541.1	4929.XP_001485114.1	0	0	0	0	0.045	0	0.900	0.323	0.929
PGUG_00031	PGUG_03772	1857416	1855153	4929.XP_001486654.1	4929.XP_001484391.1	0	0	0	0	0.928	0	0	0.063	0.929
PGUG_03256	RPS1	1856289	1853516	4929.XP_001485527.1	4929.XP_001482754.1	0	0	0	0	0.929	0	0	0	0.929
PGUG_03256	PGUG_04067	1856289	1854100	4929.XP_001485527.1	4929.XP_001483338.1	0	0	0	0	0.929	0.050	0	0	0.929
PGUG_02333	PGUG_05105	1855366	1853912	4929.XP_001484604.1	4929.XP_001483150.1	0.066	0	0	0	0.719	0.727	0	0.135	0.929
PGUG_03256	PGUG_02744	1856289	1855777	4929.XP_001485527.1	4929.XP_001485015.1	0	0	0	0	0.929	0	0	0	0.929
PGUG_01282	PGUG_05084	1856373	1853891	4929.XP_001485611.1	4929.XP_001483129.1	0.174	0	0	0	0.461	0.252	0	0.812	0.929
PGUG_02251	PGUG_03256	1857342	1856289	4929.XP_001486580.1	4929.XP_001485527.1	0	0	0	0	0.929	0	0	0.048	0.929
PGUG_02134	PGUG_03973	1857225	1854006	4929.XP_001486463.1	4929.XP_001483244.1	0	0	0	0	0.050	0	0.900	0.304	0.928
PGUG_02539	TIF6	1855572	1854852	4929.XP_001484810.1	4929.XP_001484090.1	0	0	0.224	0	0.137	0.815	0	0.493	0.928
PGUG_01317	PGUG_03724	1856408	1855105	4929.XP_001485646.1	4929.XP_001484343.1	0.147	0	0	0	0.063	0.045	0.800	0.603	0.928
PGUG_02579	PGUG_02577	1855612	1855610	4929.XP_001484850.1	4929.XP_001484848.1	0	0	0	0	0.125	0.088	0.900	0.215	0.928
PGUG_02577	PGUG_02540	1855610	1855573	4929.XP_001484848.1	4929.XP_001484811.1	0	0	0	0	0.125	0.088	0.900	0.215	0.928
PGUG_03724	PGUG_04596	1855105	1854629	4929.XP_001484343.1	4929.XP_001483867.1	0.147	0	0	0	0.063	0.045	0.800	0.603	0.928
PGUG_01503	PGUG_02577	1856594	1855610	4929.XP_001485832.1	4929.XP_001484848.1	0	0	0	0	0.125	0.088	0.900	0.215	0.928
PGUG_02404	PGUG_02402	1855436	1855435	4929.XP_001484674.1	4929.XP_001484673.1	0	0.656	0	0	0	0	0.800	0	0.928
PGUG_04832	PGUG_05785	1853639	1852785	4929.XP_001482877.1	4929.XP_001482023.1	0	0	0	0	0.719	0.727	0	0.145	0.928
PGUG_00465	PGUG_03307	1857850	1854688	4929.XP_001487088.1	4929.XP_001483926.1	0	0	0	0	0.574	0.094	0	0.829	0.928
PGUG_01489	PGUG_02595	1856580	1855628	4929.XP_001485818.1	4929.XP_001484866.1	0.162	0	0	0	0.052	0	0.900	0.203	0.928
PGUG_03700	PGUG_04832	1855081	1853639	4929.XP_001484319.1	4929.XP_001482877.1	0	0	0	0	0.719	0.727	0	0.142	0.928
PGUG_01483	PGUG_05410	1856574	1853152	4929.XP_001485812.1	4929.XP_001482390.1	0	0	0	0	0.728	0.747	0	0	0.928
PGUG_01503	PGUG_03485	1856594	1854866	4929.XP_001485832.1	4929.XP_001484104.1	0	0	0	0	0.125	0.088	0.900	0.215	0.928
PGUG_01829	PGUG_04817	1856920	1853624	4929.XP_001486158.1	4929.XP_001482862.1	0	0	0	0	0.109	0.674	0	0.774	0.928
PGUG_00503	PGUG_03638	1857888	1855018	4929.XP_001487126.1	4929.XP_001484256.1	0.095	0	0	0	0.715	0.724	0	0.112	0.928
PGUG_02579	PGUG_03485	1855612	1854866	4929.XP_001484850.1	4929.XP_001484104.1	0	0	0	0	0.125	0.088	0.900	0.215	0.928
TRM8	PGUG_04212	1858213	1854245	4929.XP_001487451.1	4929.XP_001483483.1	0.093	0	0	0	0.643	0	0	0.796	0.928
PGUG_04024	PGUG_04828	1854057	1853635	4929.XP_001483295.1	4929.XP_001482873.1	0	0	0	0	0	0	0.900	0.318	0.928
PGUG_03738	PGUG_04068	1855119	1854101	4929.XP_001484357.1	4929.XP_001483339.1	0	0	0	0	0	0	0.900	0.318	0.928
PGUG_02540	PGUG_03485	1855573	1854866	4929.XP_001484811.1	4929.XP_001484104.1	0	0	0	0	0.125	0.088	0.900	0.215	0.928
PGUG_04294	PGUG_05099	1854327	1853906	4929.XP_001483565.1	4929.XP_001483144.1	0	0	0	0	0.737	0.738	0	0	0.928
PGUG_00055	PGUG_01417	1857440	1856508	4929.XP_001486678.1	4929.XP_001485746.1	0.080	0	0	0	0.109	0.052	0.900	0.217	0.928
PGUG_01325	PGUG_04713	1856416	1853520	4929.XP_001485654.1	4929.XP_001482758.1	0.076	0	0	0	0.080	0.055	0.900	0.245	0.928
PGUG_00485	PGUG_05491	1857870	1853233	4929.XP_001487108.1	4929.XP_001482471.1	0	0	0	0	0.357	0.893	0	0	0.928
PGUG_03256	EFT2	1856289	1855945	4929.XP_001485527.1	4929.XP_001485183.1	0	0	0	0	0.913	0	0	0.216	0.928
PGUG_01083	PGUG_02042	1858468	1857133	4929.XP_001487706.1	4929.XP_001486371.1	0.086	0	0	0	0.045	0	0.900	0.280	0.928
PGUG_00657	EGD2	1858042	1855473	4929.XP_001487280.1	4929.XP_001484711.1	0.049	0	0	0	0.927	0	0	0	0.927
PGUG_03256	PGUG_04739	1856289	1853546	4929.XP_001485527.1	4929.XP_001482784.1	0	0	0	0	0.927	0	0	0	0.927
PGUG_01877	PGUG_04324	1856967	1854357	4929.XP_001486205.1	4929.XP_001483595.1	0	0	0	0	0.245	0.893	0	0.175	0.927
PGUG_01002	PGUG_02458	1858387	1855491	4929.XP_001487625.1	4929.XP_001484729.1	0.049	0	0	0	0.054	0.134	0.900	0.215	0.927
PGUG_00488	PGUG_05219	1857873	1852961	4929.XP_001487111.1	4929.XP_001482199.1	0.219	0.810	0.423	0	0.248	0	0	0	0.927
PGUG_03124	PGUG_04562	1856157	1854595	4929.XP_001485395.1	4929.XP_001483833.1	0	0	0	0	0.045	0	0.900	0.304	0.927
PGUG_00899	PGUG_05718	1858284	1852717	4929.XP_001487522.1	4929.XP_001481955.1	0	0	0	0	0.210	0.268	0	0.885	0.927
PGUG_01282	PGUG_02477	1856373	1855510	4929.XP_001485611.1	4929.XP_001484748.1	0.052	0	0	0	0.053	0	0.900	0.289	0.927
RPS0	PGUG_05290	1855403	1853032	4929.XP_001484641.1	4929.XP_001482270.1	0	0	0	0	0.349	0.893	0	0	0.927
PGUG_01401	PGUG_04476	1856492	1854509	4929.XP_001485730.1	4929.XP_001483747.1	0	0	0	0	0.351	0.893	0	0	0.927
PGUG_01057	PGUG_05137	1858442	1853944	4929.XP_001487680.1	4929.XP_001483182.1	0	0	0	0	0.130	0.667	0	0.771	0.927
PGUG_03356	PGUG_04771	1854737	1853578	4929.XP_001483975.1	4929.XP_001482816.1	0	0	0	0	0.685	0	0	0.779	0.927
[truncated: 3,912 more rows]
