# Supplementary material for: In silico Prediction of Protein–Protein Interaction Network Induced by Manganese II in Meyerozyma guilliermondii
Source: Front Microbiol. 2020 Feb 19;11:236. doi: 10.3389/fmicb.2020.00236 (PMC7042463; doi:10.3389/fmicb.2020.00236)
Supplement: Supplementary file 2 [file Table_2.xlsx]

## Sheet: Plan1
Table S2. Functional enrichments in network
#pathway ID	pathway description	observed gene count	false discovery rate (FDR)	Matching proteins in network (IDs)	matching proteins in your network (labels)
pgu01100	Metabolic pathways	21	0.0030	XP_001482100.1,XP_001482343.1,XP_001482538.1,XP_001482540.1,XP_001482603.1,XP_001482608.1,XP_001483045.1,XP_001483272.1,XP_001483839.1,XP_001484360.1,XP_001484478.1,XP_001484894.1,XP_001485013.1,XP_001485076.1,XP_001485708.1,XP_001485713.1,XP_001486045.1,XP_001486381.1,XP_001486703.1,XP_001487399.1,XP_001487756.1	PGUG_00080,PGUG_00776,PGUG_01133,PGUG_01379,PGUG_01384,PGUG_01716,PGUG_02052,PGUG_02623,PGUG_02742,PGUG_02805,PGUG_03741,PGUG_03859,PGUG_04001,PGUG_04568,PGUG_05000,PGUG_05363,PGUG_05558,PGUG_05560,PGUG_05623,PGUG_05628,PGUG_05863
pgu00480	Glutathione metabolism	4	0.0161	XP_001483895.1,XP_001485076.1,XP_001485856.1,XP_001487227.1	PGUG_00604,PGUG_01527,PGUG_02805,PGUG_03276
pgu01110	Biosynthesis of secondary metabolites	11	0.0161	XP_001482100.1,XP_001482540.1,XP_001482608.1,XP_001483272.1,XP_001484360.1,XP_001485013.1,XP_001485076.1,XP_001485708.1,XP_001486381.1,XP_001486703.1,XP_001487399.1	PGUG_00080,PGUG_00776,PGUG_01379,PGUG_02052,PGUG_02742,PGUG_02805,PGUG_03741,PGUG_04001,PGUG_05560,PGUG_05628,PGUG_05863
pgu01130	Biosynthesis of antibiotics	9	0.0161	XP_001482100.1,XP_001482608.1,XP_001483045.1,XP_001485076.1,XP_001485708.1,XP_001486045.1,XP_001486381.1,XP_001486703.1,XP_001487399.1	PGUG_00080,PGUG_00776,PGUG_01379,PGUG_01716,PGUG_02052,PGUG_02805,PGUG_05000,PGUG_05628,PGUG_05863
pgu01230	Biosynthesis of amino acids	6	0.0224	XP_001482608.1,XP_001485076.1,XP_001485708.1,XP_001486045.1,XP_001486381.1,XP_001486703.1	PGUG_00080,PGUG_01379,PGUG_01716,PGUG_02052,PGUG_02805,PGUG_05628
pgu00640	Propanoate metabolism	3	0.0285	XP_001481951.1,XP_001486383.1,XP_001487399.1	PGUG_00776,PGUG_02054,PGUG_05714
pgu04213	Longevity regulating pathway - multiple species	3	0.0472	XP_001482603.1,XP_001484089.1,XP_001486795.1	PGUG_00172,PGUG_03470,PGUG_05623
